# Supplementary material for: Revised Korean Society of Infectious Diseases/National Evidence-based Healthcarea Collaborating Agency Guidelines on the Treatment of Patients with COVID-19
Source: PubMed Central journal article supplement — Infect Chemother. 2021 Mar 24;53(1):166–219. doi: 10.3947/ic.2021.0303 (PMC8032920; doi:10.3947/ic.2021.0303), 2021-03-24
Supplement: ic-53-166-s001.pdf [file ic-53-166-s001.pdf]

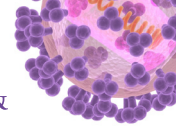

## Special Article

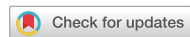

# 대한 감염학회/한국 보건 의료 연구원 코로나 19 환자 약물 치료 지침

김선빈 <sup>ID 1,\*</sup>, 류승은 <sup>ID 2,\*</sup>, 허경민 <sup>ID 3</sup>, 주은정 <sup>ID 4</sup>, 김윤정 <sup>ID 5</sup>, 최원석 <sup>ID 1</sup>, 김예진 <sup>ID 6</sup>,  
 윤영경 <sup>ID 1</sup>, 허중연 <sup>ID 7</sup>, 서유빈 <sup>ID 8</sup>, 정수진 <sup>ID 9</sup>, 박동아 <sup>ID 2</sup>, 유수연 <sup>ID 2</sup>, 이현정 <sup>ID 2</sup>,  
 김지민 <sup>ID 2</sup>, 김연 <sup>ID 2</sup>, 박정은 <sup>ID 2</sup>, 백경란 <sup>ID 3</sup>, 최미영 <sup>ID 2</sup>, 염준섭 <sup>ID 9</sup>, 대한감염학회

<sup>1</sup>고려대학교 의과대학 감염내과

<sup>2</sup>한국보건 의료 연구원

<sup>3</sup>성균관대학교 의과대학 삼성 서울병원 감염내과

<sup>4</sup>성균관대학교 의과대학 강북 삼성병원 감염내과

<sup>5</sup>가톨릭대학교 의과대학 인천 성모 병원 감염내과

<sup>6</sup>성균관대학교 의과대학 삼성 서울병원 소아청소년과

<sup>7</sup>아주대학교 의과대학 감염내과

<sup>8</sup>한림대학교 의과대학 강남 성심병원 감염내과

<sup>9</sup>연세대학교 의과대학 감염내과

## OPEN ACCESS

Received: Feb 23, 2021

### Corresponding Author:

Joon-Sup Yeom, MD, DTM&H, PhD

Department of Internal Medicine, Yonsei  
 University College of Medicine, Yonsei-ro 50-1,  
 Seodaemun-gu, Seoul, Republic of Korea.  
 E-mail: joonsup.yeom@yuhs.ac

Miyoung Choi, MPH, PhD

Division of Healthcare Technology Assessment  
 Research, National Evidence-based  
 Healthcare Collaborating Agency, Seoul,  
 Korea.  
 E-mail: mychoi@neca.re.kr

\*Sun Bean Kim and Seungeun Ryoo

contributed equally to this study as 1st author.

Copyright © 2021 by The Korean Society  
 of Infectious Diseases, Korean Society for  
 Antimicrobial Therapy, and The Korean Society  
 for AIDS

This is an Open Access article distributed  
 under the terms of the Creative Commons  
 Attribution Non-Commercial License (<https://creativecommons.org/licenses/by-nc/4.0/>)  
 which permits unrestricted non-commercial  
 use, distribution, and reproduction in any  
 medium, provided the original work is properly  
 cited.

### ORCID iDs

Sun Bean Kim <sup>ID</sup>  
<https://orcid.org/0000-0002-9983-4392>  
 Seungeun Ryoo <sup>ID</sup>  
<https://orcid.org/0000-0002-0604-5141>  
 Kyungmin Huh <sup>ID</sup>  
<https://orcid.org/0000-0002-5140-3964>  
 Eun-Jeong Joo <sup>ID</sup>  
<https://orcid.org/0000-0003-4741-4406>  
 Youn Jeong Kim <sup>ID</sup>  
<https://orcid.org/0000-0001-5870-1801>

<https://icjournal.org>

## ABSTRACT

확산을 막기 위한 전 세계적인 노력에도 불구하고 코로나 19 범유행으로 인해 200만 명 이상의 사망자가 발생하였다. 코로나 19 치료 약제를 찾기 위해 현재 수많은 임상 연구가 진행 중이며, 매일 새로운 연구 결과들이 발표되고 있다. 이 중 몇 가지 약제들은 효과가 입증되어 코로나 19 치료제로 사용되고 있다. 따라서 최신의 근거를 바탕으로 치료 약제를 권고하기 위해 근거 기반 방법론을 개발하고 새로운 근거를 지속적으로 확인하며 그에 따라 권고문을 업데이트 하는 것이 매우 중요하다. 이 글에서는 최신 근거를 기반으로 한 코로나 19 약물 치료에 관한 지침을 소개하고자 한다.

**Keywords:** COVID-19; clinical practice guidelines; Korea

## 지침의 사용 안내

본 권고안은 현재 국내 실정을 고려한 코로나바이러스 감염증-19 (COVID-19, 이하 코로나 19) 환자의 약물적 치료에 대한 기본적인 원칙을 제시하는 것으로서, 모든 대상자에 대해서 본 지침을 일률적으로 적용하는 것보다는 기본적으로 참고하되 각 환자의 여러 상황들을 고려한 의사의 최종적인 판단에 의한 진료가 중요하다. 또한 본 권고안은 개인적인 진료 및 교육 목적으로 활용될 수 있지만 상업적인 목적이거나 진료 심사 목적 등으로 사용될 수 없으며, 어떠한 형태로든 다른 목적으로 사용하고자 하는 경우에는 지침 개발위원회에 서면 요구서를 제출하여 서면 동의를 받아야 한다.

## I. 머리말

### 1. 배경 및 목적

코로나19는 2020년 현재 전세계적으로 가장 많이 확산된 감염병으로서 각국의 방역 노력에도 불구하고 확실한 치료제가 개발되지 않았고, 백신은 개발 초기의 단계에 있다. 한국은 성

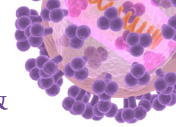

Won Suk Choi 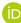  
<https://orcid.org/0000-0001-5874-4764>  
 Yae-Jean Kim 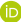  
<https://orcid.org/0000-0002-8367-3424>  
 Young Kyung Yoon 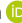  
<https://orcid.org/0000-0001-8435-935X>  
 Jung Yeon Heo 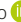  
<https://orcid.org/0000-0002-6548-1939>  
 Yu Bin Seo 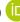  
<https://orcid.org/0000-0001-5183-1996>  
 Su Jin Jeong 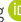  
<https://orcid.org/0000-0003-4025-4542>  
 Dong-ah Park 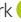  
<https://orcid.org/0000-0001-7225-3152>  
 Su-Yeon Yu 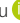  
<https://orcid.org/0000-0001-5488-5068>  
 Hyeon-Jeong Lee 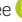  
<https://orcid.org/0000-0002-0822-2420>  
 Jimin Kim 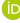  
<https://orcid.org/0000-0001-7375-4274>  
 Yan Jin 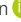  
<https://orcid.org/0000-0002-2266-1040>  
 Jungeun Park 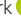  
<https://orcid.org/0000-0002-1129-5495>  
 Kyong Ran Peck 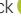  
<https://orcid.org/0000-0002-7464-9780>  
 Miyoung Choi 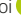  
<https://orcid.org/0000-0002-2424-9965>  
 Joon Sup Yeom 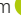  
<https://orcid.org/0000-0001-8940-7170>

#### Funding

This research was supported by the National Evidence-based Collaborating Agency (NECA-P-20-002) and KSID (Korean Society of Infection Disease).

#### Conflict of Interest

No conflict of interest.

#### Author Contributions

Conceptualization: SBK, WSC, JSY, KRP, MYC, DAP. Data curation: MYC, DAP, SY, HJL, JMK, YJ, JEP, SER. Formal analysis: SY, HJL, JMK, YJ, JEP, SER. Funding acquisition: MYC. Investigation: MYC, DAP, SY, HJL, JMK, YJ, JEP, SER, SBK, KMH, JYH, JEJ, YJK, WSC, YJK, YKY, SJJ, KRP, JSY. Methodology: MYC, DAP, SY, HJL, JMK, YJ, JEP, SER. Project administration: SBK, KMH, JYH, JEJ, YJK, WSC, YJK, YKY, SJJ. Resources: YBS, MYC, DAP. Software: SBK, KMH, JYH, JEJ, YJK, WSC, YJK, YKY, SJJ. Supervision: YJK, JSY, KRP, MYC. Validation: YJK, JSY, KRP, MYC. Visualization: MYC, DAP, SY, HJL, JMK, YJ, JEP, SER. Writing - original draft: SBK, KMH, JYH, JEJ, YJK, WSC, YJK, YKY, SJJ, MYC. Writing - review & editing: SBK, KMH, JYH, JEJ, YJK, WSC, YJK, YKY, SJJ, MYC, SER, KRP, JSY.

공적인 방역을 통해 국민의 건강을 보호해왔으나, 실제 임상 현장에서는 입원환자들의 폐렴 및 기타 장기 감염 관련 치료와 관련된 신속하고 근거에 기반한 임상진료지침 개발 요구가 높다. 현재 전세계에서 백신 개발 및 치료제 개발을 위한 임상연구가 활발하게 이루어지고 있어, 코로나 감염 확산 초기에 비해 많은 임상적 결과에 대한 논문들이 매일 발표되고 있다. 따라서 방법론적인 측면에서는 근거에 기반하여 신속하게 개발해야 할 뿐만 아니라 지속적인 추가 근거의 확인과 권고문 업데이트가 필요한 상황이다. 다양한 임상 양상과 치사율을 보이는 코로나19와 관련하여 현재로서 지지 치료 외에 확립된 항바이러스제 표준 치료방법은 없으나, 최신 근거들을 바탕으로 하여 도움이 될 수 있는 항바이러스제 및 기타 약물 치료에 대해 이 지침을 통해 소개하고자 한다.

## 2. 연구 목적

코로나19로 입원하는 환자들의 치료를 담당하는 의료진을 위해 최신의 치료방법에 대한 근거들을 검토하여 국내 상황에 맞는 근거기반 치료 임상진료지침을 신속하게 개발하는 것이다. 또한, 본 지침은 가이드라인 개발 방법론 측면에서는 코로나19와 같은 긴급한 상황 속에서 신속하면서도 최신의 근거를 기반으로 하는 가이드라인 개발 방법론을 탐색하여 적용하고자 한다.

## 3. 연구 방법

본 지침은 가이드라인 개발 방법론 측면에서는 짧은 기간 내 신속한 권고안 개발을 위해 주요 국가 및 기관의 최신 가이드라인을 검토하여 활용하는 수용 개작 방법을 기반으로 한다. 또한 최신 근거를 지속적으로 반영하는 살아있는 가이드라인(living guideline) 개발 방법론을 적용하고자 하였다. 가이드라인 개발 과정은 다음과 같다

### [1] 진료 지침의 검색

검색원 선정 및 검색전략 구성 그리고 실제 문헌검색과 업데이트 전체 과정을 문헌정보검색 전문가와 함께 논의하여 진행하였다. 2020년 6월 이후 발표된 논문들을 포함하는 진료지침들 혹은 지속적인 갱신을 하고 있는 living guideline들을 수용 개작 대상으로 하기로 하였으며, 이번 지침에서는 2020년 12월 9일까지 검색한 문헌에 한정하였다.

### [2] 검색원

문헌 검색데이터베이스는 국외 PubMed와 EMBASE를 검색하였고 주요 진료지침 가이드라인 데이터베이스와 website를 검색하였다. 특히 진료지침 개발에 소요되는 시간을 고려했을 때, 출판 문헌으로 나온 guideline 보다는 website가 실시간 근거 업데이트가 잘되고 있어 신뢰할 수 있는 주요 정부 기구와 기관 및 학회 사이트를 직접 검색하는 것이 중요하다고 판단하였다.

### [3] 검색 전략

PubMed와 EMBASE를 기반으로 질환 및 치료제 검색용어 선정 및 진료지침 검색을 위한 필터를 적용하였다. 검색어는 'coronavirus', 'novel coronavirus', 'novel coronavirus 2019', '2019 nCoV', 'COVID-19', 'Wuhan coronavirus', 'Wuhan pneumonia', 'SARS-CoV-2', 'severe acute respiratory syndrome', 'treatment', 'therapy', 'antiviral' 그리고 각 임상질문의 주요 치료제 용어를 기반으로 통제어와 자연어를 조합하여 사용하였다.

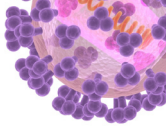

#### [4] 진료 지침 선택 기준

2020년 6월 이후에 나온 연구들이 코로나19 치료경험에 대해 질적으로나 양적으로 신뢰할 만한 정보를 담고 있어 가능한 최근 guideline이면서 방법론적 질이 높은 진료지침을 선택하기로 하였다. 주요 국가 및 기구에서 개발된 지침이면서 선정된 임상질문에 대한 권고를 포함하며 자주 업데이트 되고 있는 지침을 선정 대상으로 하였다.

#### [5] 진료 지침의 질 평가

진료지침의 질 평가는 AGREE 2 도구를 이용해서 3인씩 평가하였다[1]. 평가자 간 변이를 줄이기 위하여 대한의학회에서 개발한 K-AGREE 평가서식을 활용하였다. AGREE 평가 시, 평가 결과의 재현성과 명확성을 확보하기 위하여 점수를 부여하는 데 근거가 된 내용을 코멘트란에 기입하였으며, 평가자들의 평가 결과를 공유하며, 필요 시 오류나 실수에 의한 잘못된 평가 결과를 수정할 수 있는 재검토 과정을 거쳤다. 진료지침의 질 평가 이후 AGREE 3개 영역에서 70점 이상을 받은 진료지침을 최종적으로 활용하기로 하였다.

#### [6] 최신 근거의 검색 및 선택

기존 진료지침의 근거표에서 선택된 근거문헌을 검토하여 수용하며, 추가 문헌의 검색원로는 PubMed, EMBASE, Cochrane CDSR, 국내 DB는 KMBASE를 이용해 검색하였다. 코로나19의 근거문헌 출판이 신속하게 진행되는 점을 고려하여 preprint DB 중 MedRxiv, bioRxiv를 이용하기로 하였으나 실제 일차 검색 후 결과를 보았을 때, 충분한 양의 문헌이 출판되고 있어 MedRxiv, BioRxiv는 검색결과를 검토는 하였으나 포함시키지 않기로 했다. 검색어는 진료지침의 검색전략을 활용하되 치료제별로 검색어를 선별하여 검색전략을 마련하였다.

지속적 근거 업데이트 관리를 위해 문헌 선별과정에는 유료 체계적문헌고찰 반자동화 소프트웨어인 Covidence를 구매하여 활용하였다.

지침 선별기준과 마찬가지로 2020년 6월 이후부터 2020년 12월 9일까지 발간된 코로나19 치료제에 대한 연구로서 임상질문에서 포함하고 있는 치료법을 중재로 포함하고 있는 인간대상 연구를 포함하기로 하였다. 연구설계의 경우는 무작위 배정 임상시험연구 또는 comparative design의 관찰연구를 포함하되 임상질문별로 근거의 양을 확인한 후 결정하기로 했다.

#### [7] 선택한 일차문헌의 비뚤림 위험 평가

기존 진료지침의 근거표에서 비뚤림위험이 평가된 근거문헌은 기준에 맞는지 검토하여 가능한 비뚤림위험 평가 결과를 수용하였다. 추가 검색된 근거의 질평가는 연구디자인에 따라 맞는 도구를 선택하고, 문헌당 2명의 연구자가 독립적으로 평가하며 의견 불일치시 합의하고 합의가 안될 경우는 제3의 의견을 받아 합의에 이르게 했다.

### 4. 연구 결과

#### [1] 진료 지침의 선정 및 평가

진료지침 검색과정에서 수기검색에서 총 11개 진료지침 중 7개에 대해 AGREE 평가를 시행하였고, 추가로 검색된 5개 진료지침 중 1편은 수기검색에서 찾은 지침과 겹쳐 4개 더 AGREE 평가를 시행했다. AGREE 평가 주요 영역 3개에서 70점 이상이면서 최신성을 고려했을 때, 4편의 진료지침이 최종 선택되었다. 다만 평가된 11편의 진료지침의 권고비교표를 작성해



표 1. 중등도 분류 체계 및 정의

| 중등도 분류            | National Institutes of Health (미국)                                                                                                                                                                                                                                                                                                                                           |
|-------------------|------------------------------------------------------------------------------------------------------------------------------------------------------------------------------------------------------------------------------------------------------------------------------------------------------------------------------------------------------------------------------|
| 1. 무증상            | 코로나19 검사에 대해 양성 반응은 보이지만 일치하는 증상이 없음<br>Individuals who test positive for SARS-CoV-2 using a virologic test (i.e., a nucleic acid amplification test or an antigen test), but who have no symptoms that are consistent with COVID-19.                                                                                                                                        |
| 2. 경증 (Mild)      | 코로나19의 다양한 징후와 증상을 가지고 있지만 호흡곤란, 기타 흉부촬영 검사상 이상 소견 없음<br>Individuals who have any of the various signs and symptoms of COVID-19 (e.g., fever, cough, sore throat, malaise, headache, muscle pain, nausea, vomiting, diarrhea, loss of taste and smell) but who do not have shortness of breath, dyspnea, or abnormal chest imaging.                                          |
| 3. 중등도 (Moderate) | 임상적인 평가 또는 영상검사상에서 호흡기질환 소견이면서 산소포화도 94% 이상<br>Individuals who show evidence of lower respiratory disease during clinical assessment or imaging and who have saturation of oxygen (SpO <sub>2</sub> ) ≥94% on room air at sea level.                                                                                                                                         |
| 4. 중증 (Severe)    | 산소포화도 94%미만, (PaO <sub>2</sub> /FiO <sub>2</sub> ) <300 mmHg, 호흡빈도 분당 30회 초과 또는 폐실질 침투 50% 초과<br>Individuals who have SpO <sub>2</sub> <94% on room air at sea level, a ratio of arterial partial pressure of oxygen to fraction of inspired oxygen (PaO <sub>2</sub> /FiO <sub>2</sub> ) <300 mmHg, respiratory frequency >30 breaths per minute, or lung infiltrates >50%. |
| 5. 심각 (Critical)  | 호흡부전, 패혈성 쇼크 그리고/또는 다발성 기관 장애<br>Individuals who have respiratory failure, septic shock, and/or multiple organ dysfunction.                                                                                                                                                                                                                                                  |

출처: 미국 국립 보건원, SARS-CoV-2 감염의 임상 스펙트럼 [2]

서, 다른 나라 권고 동향을 참고하는데 활용하였다. 환자 중증도에 대한 분류는 각 국가 중증도 분류 비교 후 미국 NIH (National Institutes of Health) 의 분류 체계를 수용하였다(표 1)[2].

## [2] 근거표 작성 및 최신성 검토

선정한 진료지침에서 선택배제 기준에 따라 선정 문헌을 포함한 근거표를 작성하였다. 질평가는 기존 가이드라인의 질 평가 결과를 재검토하여 수용하고, 적절하지 않은 경우는 재평가하였다. 11월 9일과 12월 9일에 검색한 문헌을 검토하여 근거표에 추가하였다.

## [3] 권고문 도출 과정

임상질문 담당 실무위원들이 근거요약과 권고 고려사항에 대한 검토를 마치고 권고문 초안을 작성하였고, 전체 회의에서 최종 권고문과 근거수준(표 2), 권고등급(표 3)을 결정하였다 [3, 4]. 이후 자문위원과 검토위원의 외부검토를 서면으로 받고 재논의 후 최종 권고문을 완성하였다 (표 4).

표 2. GRADE 근거수준과 의미

| 근거수준             | 정의                                                                      |
|------------------|-------------------------------------------------------------------------|
| 높음 (high)        | 효과의 추정치가 실제 효과에 가깝다는 것을 매우 확신할 수 있다.                                    |
| 중등도 (moderate)   | 효과의 추정치에 대한 확신을 중등도로 할 수 있다. 효과의 추정치는 실제 효과에 근접할 것으로 보이지만 상당히 다를 수도 있다. |
| 낮음 (low)         | 효과의 추정치에 대한 확신이 제한적이다. 실제 효과는 효과 추정치와 상당히 다를 수 있다.                      |
| 매우 낮음 (very low) | 효과의 추정치에 대한 확신이 거의 없다. 실제 효과는 효과의 추정치와 상당히 다를 것이다.                      |

표 3. GRADE 권고등급과 의미

| 권고등급                              | 정의                                                                                                                                                       |
|-----------------------------------|----------------------------------------------------------------------------------------------------------------------------------------------------------|
| 근거 기반 권고                          |                                                                                                                                                          |
| A 강하게 권고함 (Strong for recommend)  | 해당 치료의 이득과 위해, 근거수준, 가치와 선호도, 자원을 고려했을 때 대부분의 임상상황에서 강하게 권고한다.                                                                                           |
| B 조건부 권고함 (Conditional recommend) | 해당 치료의 사용은 임상상황 또는 환자/사회적 가치에 따라 달라질 수 있어, 선택적으로 사용하거나 조건부로 선택할 것을 제안한다.                                                                                 |
| C 시행을 권고하지 않음 (Against recommend) | 해당 치료의 위해가 이득보다 더 클 수 있고, 임상적 상황 또는 환자/사회적 가치를 고려하여, 시행을 권고하지 않는다.                                                                                       |
| I 권고 불류(Inconclusive)             | 해당 치료의 이득과 위해, 근거수준, 가치와 선호도, 자원을 고려했을 때 근거수준이 너무 낮거나, 이득/위해 저울질이 심각하게 불확실, 또는 변이가 커서 중재 시행여부를 결정하지 않는다. 이는 치료의 사용을 권하거나 반대할 수 없다는 의미로서, 임상적 판단을 따르도록 한다 |
| E 전문가 합의 권고 (Expert consensus)    | 임상적 근거문헌은 부족하나 해당 치료의 이득과 위해, 근거수준, 가치와 선호도, 자원을 고려했을 때 임상적 경험과 전문가의 합의에 따라 사용을 권고한다.                                                                    |



표 4. 권고문 요약

| 임상질문                    | 권고문                                                                                                                                                                                                                                                                      | 근거수준       | 권고등급   |
|-------------------------|--------------------------------------------------------------------------------------------------------------------------------------------------------------------------------------------------------------------------------------------------------------------------|------------|--------|
| CQ1. Remdesivir         | 1-1. 산소치료가 필요하지만 인공호흡기나 ECMO치료까지 필요하지 않는 코로나19 환자에게 렘데시비르 (Remdesivir)를 사용할 수 있다.                                                                                                                                                                                        | 중등도        | B      |
| CQ2. HCQ ± azithromycin | 1-2. 1번에 해당되지 않는 코로나19 환자들에게 렘데시비르의 투여에 대한 권고를 보류한다.<br>코로나19 환자에게 하이드록시클로로퀸(Hydroxychloroquine, HCQ) 단독 투여나 아지스로마이신(azithromycin, AZM)과의 병합 투여를 모두 권고하지 않는다.                                                                                                            | 중등도<br>높음  | I<br>C |
| CQ3. LPV/r              | 코로나19 환자에게 로피나비르/리토나비르 lopinavir/ritonavir, LPV/r)의 투여를 권고하지 않는다.                                                                                                                                                                                                        | 높음         | C      |
| CQ4. 기타 항바이러스제          | 코로나19 환자에게 파비피라비르(favipiravir), 리바비린(ribavirin), 우미페노비르(umifenovir), 발록사비르(baloxavir marboxil) 등 기타 바이러스 억제 효과가 있다고 알려진 약제 투여는 임상시험 외에는 권고하지 않는다.                                                                                                                        | 낮음         | C      |
| CQ5. 스테로이드              | 5-1. 중증(severe) 또는 심각한(critical) 코로나19 환자에게 스테로이드(Steroid) 투여를 권고한다.<br>임상적 고려사항: 스테로이드는 하루 덱사메타손 6 mg을 7 - 10일간 투여하며, 다른 스테로이드를 같은 역가로 대체 투여 할 수 있다. (하이드로코티손 150 - 200 mg, 프레드니손 40 mg, 메틸프레드니솔론 32 mg)<br>5-2. 중증이 아닌 코로나19 환자 (non-severe)에 대해서는 스테로이드 투여를 권고하지 않는다. | 중등도        | A<br>C |
| CQ6. 인터루킨-6 억제제         | 6-1. 중증 코로나19 환자에게 인터루킨-6 (Interleukin-6, IL-6) 억제제는 임상 시험 범위 내에서 사용할 수 있다.<br>6-2. 경증 코로나19 환자에게 인터루킨-6 억제제 투여를 권고하지 않는다.                                                                                                                                               | 중등도<br>중등도 | B<br>C |
| CQ7. 인터루킨-1 억제제         | 코로나19 환자에게 인터루킨-1(Interleukin-1, IL-1) 억제제 투여에 대한 권고를 보류한다.                                                                                                                                                                                                              | 낮음         | I      |
| CQ8. Interferon         | 코로나19 환자에게 인터페론(Interferon)은 임상 시험 범위 내에서 사용할 수 있다.                                                                                                                                                                                                                      | 낮음         | B      |
| CQ9. 회복기 혈장             | 코로나19 환자에게 회복기 혈장 치료에 대한 권고를 보류한다.                                                                                                                                                                                                                                       | 낮음         | I      |
| CQ10. Conventional IVIG | 코로나19 환자에게 일반적인 정맥용 면역글로불린 (conventional intravenous immunoglobulin, IVIG) 투여는 권고하지 않는다. 다만 합병증 치료에서 적응증이 될 때에는 면역글로불린 사용을 배제하지 말아야 한다.                                                                                                                                  | 낮음         | C      |

### CQ1 렘데시비르 (Remdesivir)

#### ○ 문장형 임상질문

1. 코로나 19 입원 환자에게 임상적 중증도에 관계없이 렘데시비르 투여를 권고하는가?
2. 코로나 19 입원 환자에서 산소치료가 요구되는 경우, 렘데시비르 투여가 표준치료 또는 무처치 대조군에 비하여 치료 효과가 있는가?

#### ○ PICO 요소

| P         | I     | C               | O                                                                                                                                                                                                                                                                                                      | 비고                       |
|-----------|-------|-----------------|--------------------------------------------------------------------------------------------------------------------------------------------------------------------------------------------------------------------------------------------------------------------------------------------------------|--------------------------|
| 코로나 19 환자 | 렘데시비르 | 표준치료 또는 무처치 대조군 | <ul style="list-style-type: none"> <li>· 임상호전까지의 시간 (time to clinical improvement)</li> <li>· 사망 (mortality)</li> <li>· 중증 경과(mechanical ventilation)</li> <li>· 입원 기간 (duration of hospitalization)</li> <li>· 인공호흡기 사용 (invasive intubation)</li> <li>· 인공호흡 기간 (duration of ventilation)</li> </ul> | 무작위배정 임상시험, 체계 분석, 메타 분석 |

#### ○ 권고문

- 1-1. 산소치료가 필요하지만 인공호흡기 또는 ECMO를 사용하지 않는 코로나19 환자에게 렘데시비르를 사용할 수 있다. (근거수준: Moderate, 권고등급: B)
- 1-2. 1번에 해당되지 않는 코로나19 환자들에게 렘데시비르의 투여에 대한 권고를 보류한다. (근거수준: Moderate, 권고등급: I (권고보류))

#### ○ 렘데시비르 관련 기본 정보

렘데시비르 (remdesivir, GS-5734)는 광범위 항바이러스 뉴클레오타이드 (아데노신) 유사체 monophosphoramidate 전구약물로, 다양한 리보핵산(ribonucleic acid, RNA) 바이러스의 RNA 의존형 중합효소 억제제(RNA dependent RNA polymerase inhibitor)로서 작용한다 [5]. 시험관 내 실험에서 다양한 RNA 바이러스(Ebola virus, Marburg, MERS-CoV [6], SARS-CoV [6], 기타 coronavirus, respiratory syncytial virus, Nipah virus, Hendra virus)에 강력한 항바이러스



효과를 보이는 것으로 알려졌다. Rhesus macaque 모형을 이용한 생체 내 실험에서는 MERS-CoV 접종(inneculation) 24시간 전에 예방요법으로 렘데시비르를 투여하였을 때 MERS-CoV 감염 예방 효과를 보였으며, 바이러스 접종 후 12시간에 치료요법으로 렘데시비르 투여 시 임상적 호전과 함께 바이러스 증식 억제, 폐세포 병변 감소 등이 관찰되었다 [7]. 사람에서 임상 1상의 안전성과 약동학 자료가 보고되었고, 19일된 신생아에서도 투여된 바 있으며 [8], 에볼라 바이러스 감염된 환자 대상 연구에서 175명에게 투여한 임상경험이 보고되었다 [9].

기존의 시험관 내 항바이러스제 실험 결과와 타임상 시험에 확인된 렘데시비르 안전성에 대한 자료를 바탕으로, 2020년 1월 26일에 SARS-CoV-2 치료 약물로는 최초로 코로나19 폐렴 환자에서 동정적 사용 목적(compassionate use)으로 렘데시비르가 투여되었고, 특별한 부작용 없이 치료 성공한 사례가 보고되었다 [10].

COVID-19 임상시험으로 경증/중등증 및 중증의 COVID-19 시험대상자에서의 NIAID (National Institute of Allergy and Infectious Diseases) ACTT-1 (Adaptive COVID-19 Treatment Trial) 임상시험(NCT04280705)이 2월 21일부터 시작되었고 [10], 임상회복까지의 시간을 단축시킨다는 중간 결과가 발표되면서 5월 1일에 미국 식품의약품안전처(Food and Drug Administration, FDA)는 렘데시비르(상품명: veklury)를 코로나19 치료제로 긴급 사용 승인하였다. ACTT-1 시험결과가 정식 보고된 이후인 10월 22일에는 코로나19 치료제로는 최초로 렘데시비르가 정식 승인되었다. 11월 2일 세계보건기구 (World Health Organization, WHO)에서는 SOLIDARITY 연구결과로[11] 렘데시비르가 코로나19 환자의 사망을 유의하게 감소시키지 못한다는 발표하며, 입원환자의 치료약제로서 렘데시비르를 사용하지 않도록 조권부 권고로 지침을 수정 갱신[12]하면서, 렘데시비르 효용성에 대해서는 여전히 논란으로 남아있다.

#### ○ 근거 요약 (Evidence summary)

렘데시비르에 대한 권고를 포함한 가이드라인은 4개로 최종 선택되었고 (WHO living guideline, Nov 2; Australian Clinical Practice Guideline (ACPG), as of Dec 3 v.30.0 ; National Institute of Health (NIH) as of Dec 3; and Infectious Diseases Society of America (IDSA) updated Nov 11), 상기 가이드라인에 포함된 연구는 4편의 무작위 배정 임상시험(randomized controlled trial, RCT) 연구였다.

최종 근거표에 포함된 연구는 총 5편이고, 무작위 배정 임상연구 4편과, 상기 4편의 무작위 배정 임상연구를 체계 검토 및 메타분석(systematic review and network meta-analysis)한 1편으로 구성되며, 3편의 연구[Wang [13], Biegel [10], Spinner [14]]에서 일차 지표로 임상적 호전(clinical improvement)을 비교하였고, SOLIDARITY 연구[11]에서는 병원 사망률을 일차변수로 평가하였다.

렘데시비르의 효용성을 처음 보고한 ACTT-1 임상시험[10]은 1,062명의 대상자가 등록되었으며, 이 중 159명은 경증/중등증 대상자, 903명(85.0%)은 중증 대상자에 해당하였다. 회복까지의 시간을 비교한 일차 평가변수의 분석에서 회복까지의 시간 중앙값은 위약군의 15일과 비교해 렘데시비르군에서 10일이었고 (회복률 비율 1.49; 95% CI, 1.12 - 1.49,  $P < 0.001$ ), 등록 시 중증 대상자(957명)에서, 회복까지의 시간 중앙값은 위약군에서 18일과 비교해 렘데시비르군에서 11일이었다(회복률 비율 1.31 [95% CI, 1.12 - 1.52];  $P < 0.001$ ). 다만 등록 시 인공호흡기



혹은 ECMO 치료를 받았던 환자에서는 두 군 간의 차이는 없었다. 15일째 사망률은 위약군의 11.9%와 비교해 렘데시비르군에서 6.7%였고(위험비, 0.55; 95% CI, 0.36 - 0.83)], 29일째 사망률은 렘데시비르 11.4% 대 위약군 15.2%로 보고되었다(위험비, 0.73; 95% CI, 0.52 - 1.03). 사망률은 등록시 중증도에 따라 차이를 보였는데, 산소치료가 요구되는 환자에서 렘데시비르를 투여할 경우 가장 큰 사망률 감소가 확인되었다.

중국에서 진행된 임상시험[13]은 237명의 중증 코로나19 감염자를 대상으로 진행되었고, 그 중 158명이 렘데시비르를, 79명이 위약을 투여 받았다. 일차 평가 변수로 28일 이내의 임상회복까지의 시간을 비교하였고, 임상적 호전은 6점 순위척도에서 2점 감소나 퇴원으로 정의하였다. ITT (intention to treat) 분석에서 임상회복까지의 시간은 렘데시비르군 21일(중앙값, IQR 13.0 - 28.0), 위약군 23일(IQR 15.0 - 28.0)로 두 군 간의 차이가 없었다(HR 1.23; 95% CI, 0.87 - 1.75). 비록 통계적인 차이가 없었지만, 증상 발현 후 10일 이내에 렘데시비르를 투여할 경우 회복까지의 시간이 18일(중앙값, IQR 12.0 - 28.0)로 위약군 23일(IQR, 15.0 - 28.0)보다 다소 회복이 빠른 경향이 관찰되었다(HR 1.52 [95% CI, 0.95 - 2.43]).

중등증(moderate) 폐렴 환자를 대상으로 진행한 임상시험[14]에서는, 총 596명의 환자가 등록되었고, 197명은 10일간 렘데시비르를 투여 받았고, 199명은 5일간 렘데시비르를, 200명은 위약을 투여 받았다. 일차평가지표로 등록 11일째 7점의 순위 척도로 평가한 임상 상태로 정의했으며, 5일 렘데시비르 치료 군이 위약군과 비교해서 11일째 임상 상태가 의미 있게 호전된 것으로 확인되었다(OR, 1.65; 95% CI, 1.09 - 2.48;  $P = 0.02$ ). 28일째 사망률은 5일 렘데시비르 치료군 1% (95% CI, 0.0 - 2.6), 10일 치료군 2% (95% CI, 0.0 - 3.6%), 위약군 2% (95% CI, 0.1 - 4.1%)로 통계학적으로 차이가 없었다.

WHO가 항바이러스 약물 재창출(repurposed antiviral drugs) 사업의 일환으로 진행된 WHO SOLIDARITY trial consortium 중간 결과를 10월 5일 MedRxiv version으로 게재하고, 12월 2월에는 중간결과를 정식 발표하였다[11]. 30개국, 405개의 병원이 참여, 11,266명의 성인이 무작위 배정되었고, 렘데시비르 군( $n = 2,743$ )과 비투약군( $n = 2,708$ )의 임상결과를 비교하였다. 28일째 병원 사망 위험을 비교해보면, 렘데시비르 치료 군의 사망 위험도 값이 0.95(0.81 - 1.11,  $P = 0.50$ ; 301/2,743 vs. 303/2,708)로, 표준 치료 군과 비교해서 사망률에 차이가 없는 것으로 분석되었다.

앞서의 4개의 무작위 배정 임상연구를 자료를 바탕으로 11월 2일에 WHO에서는 체계 검토 및 메타분석 결과를 발표[12]하였고, 렘데시비르 투여가 사망, 인공호흡기 사용, 약물 중단에 이르는 심각한 이상반응, 7일째 바이러스 제거율, 급성 신손상 발생, 임상호전까지의 시간, 재원 기간 및 인공호흡기 사용기간에 효과가 없다고 보고하였고, 따라서 코로나19의 중증도와 관계없이 렘데시비르 투여를 조건부 권고 반대의 의견을 제시하였다. 다만 증거의 확실성(certainty of the evidence)은 낮거나, 매우 낮았다.

## ○ 권고 고려사항

### 1. 근거수준

렘데시비르의 치료 효과에 대해 연구한 4편의 무작위 배정 임상연구에서 환자 기저 상태 차이와 대조군의 특징이 연구에 명확히 기술되어 있고, 그 근거 수준은 높다. 다만 무작위 배정 임상연구 3편은 일차평가변수로 임상회복까지의 시간을, 나머지 1편의 무작위 배정 임상연구



구와 체계 분석 연구 1편은 사망률을 일차평가변수로 활용하여 연구 간 평가 변수의 차이가 존재하고, 다양한 중증도의 환자가 등록되어서, 평가 지표와 환자 중증도에 따라서, 렘데시비르의 치료 효과가 연구 간 차이를 보이고 있다. 주요 무작위 배정 임상연구의 비뚤림위험 평가에서 missing data 등 일부 요소에서 약간의 우려가 있어 근거수준은 1등급 낮은 '중등도 (Moderate)'으로 평가하였다.

## 2. 이득과 위해

무작위 배정 임상연구에서 렘데시비르 투여군에서 회복까지의 기간을 단축시킨다는 보고와, 회복시간 단축이나 사망에 효과가 없었다는 보고가 있어서 결과가 일관되지 않았다. 지금까지의 근거를 바탕으로 판단할 때 모든 중증도의 환자에서 사망을 줄여줄 가능성은 낮겠으나, 일부 중증의 환자에서 임상 회복까지의 기간의 단축시킬 가능성이 있겠다.

모든 연구에서 항바이러스제에 의한 중증 부작용이나 이로 인한 약물 중단 빈도는 대조군과 유의한 차이가 없었다.

## 3. 환자의 가치와 선호도

한국에서 코로나 19 환자를 대상으로 치료 약제 선택에 대한 가치와 선호도를 조사한 연구는 없다. 하지만, 국내 식품의약품안전처에서 렘데시비르를 품목 허가하였고, 중증 환자에 한해서 국가에서 렘데시비르를 무상으로 공급하고 있고, 아직 렘데시비르 대체할만한 항바이러스 약제가 없다는 점을 고려하면, 환자의 선호도는 높을 것으로 예상된다.

## 4. 자원(비용 포함)

중증 환자에 한해서 렘데시비르는 국가에서 무상으로 공급하고 있다.

## 5. 국내 수용성과 적용성(Acceptability and Applicability)

### 1) 다른 국가 임상진료지침과의 권고 비교

WHO 가이드라인에서는 코로나19 입원 환자에서 중증도에 관계없이 렘데시비르 사용하지 않도록 조건부로 권고하는 지침을 발표(conditional recommendation against the use of remdesivir)했으나 권고수준과 등급에 대해서는 언급하지 않았다. 호주 가이드라인에서는 산소 치료가 요구되지만 인공호흡기를 달지 않는 입원 환자에서 조건부로 권고(conditional)하였고, 권고등급은 2로 제시하였다.

미국 NIH에서는 경증/중등증 환자에서 렘데시비르를 사용하지 않도록 권고(AI)하였다. 산소치료가 요구되지만 고유량산소, 비침습적/침습적 인공호흡기 사용, ECMO가 요구되지 않는 환자에 한해서 5일간 렘데시비르를 투약할 것을 권고 (AI)하고, 환자가 고유량 산소 혹은 비침습적/침습적 인공호흡기 사용, ECMO가 필요한 상황일 때는, 렘데시비르 사용이 도움이 된다는 임상적 근거가 없기 때문에, 투여 혹은 비투여를 권고하지 않았다. 미국 IDSA 가이드라인에서는 중증의 입원 환자에서 다른 항바이러스 치료제 보다는 렘데시비르 사용을 제안하였고 (조건부 권고, 중등 근거; conditional recommendation, moderate certainty of evidence), 산소치료가 필요하지만 인공호흡기 또는 ECMO를 사용하지 않는 환자에서 렘데시비르를 10일보다는 5일 투여할 것을 권고하였다. (조건부 권고, 낮은 근거; conditional recommendation, low certainty of evidence).

## 2) 국내 수용성과 적용성 평가

NECA 임상진료지침 핸드북(2015)에서 개발된 국내 수용성과 적용성 평가도구를 활용하여 이들 5개 진료 지침에 대한 국내 수용성 및 적용성 평가를 수행하였다.

## 6. 기타 고려사항

국내 식품의약품안전처는 6월 3일 렘데시비르에 대한 특례 수입을 결정, 7월 1일부터 국내 중증 코로나19 환자를 대상으로 렘데시비르 투약이 시작되었고, 7월 24일에 식품의약품안전처는 베클루리주(성분명 렘데시비르) 품목 허가하였다. 그러나, 이는 긴급한 코로나19 상황을 감안한 국내 렘데시비르의 안정적인 수급을 위한 조치일 뿐, 당시에는 국내 렘데시비르 투약 환자를 분석한 임상 자료는 없었다. 하지만 최근에 국내에서 수행된 다기관 후향적 연구에서 렘데시비르 투약군에서 인공호흡기 요구도를 낮추고, 바이러스 농도 감소에 효과를 보여 중증 코로나19 환자에서 이득이 있다는 것을 확인하였다[15].

## CQ2 하이드록시클로로퀸 (Hydroxychloroquine) ± 아지스로마이신 (azithromycin)

### ○ 문장형 임상질문

코로나19 환자에게 하이드록시클로로퀸 혹은 하이드록시클로로퀸과 아지스로마이신 병합 투여가 표준치료 또는 무처치 대조군에 비하여 치료효과 및 안전성이 있는가?

### ○ PICO 요소

| P               | I                                   | C                  | O                                                                                                                                                                                                                                                                             | 비고                                 |
|-----------------|-------------------------------------|--------------------|-------------------------------------------------------------------------------------------------------------------------------------------------------------------------------------------------------------------------------------------------------------------------------|------------------------------------|
| 코로나 19<br>입원 환자 | 하이드록시클로로퀸<br>하이드록시클로로퀸 +<br>아지스로마이신 | 표준치료 또는<br>무처치 대조군 | <ul style="list-style-type: none"> <li>· 사망</li> <li>· 기계환기/ECMO 치료</li> <li>· 기계환기/ECMO 치료 기간</li> <li>· 중환자실 치료</li> <li>· 중환자실 재실 기간</li> <li>· 중증 경과 (산소 투여, HFNC, MV, ECMO)</li> <li>· 입원 기간</li> <li>· 임상 증상 호전까지의 기간</li> <li>· 바이러스 음전</li> <li>· 약물 유해 작용</li> </ul> | 무작위 배정<br>임상연구,<br>비교군이 있는<br>관찰연구 |

### ○ 권고문

코로나 19 환자에게 하이드록시클로로퀸 단독 요법 및 하이드록시클로로퀸과 아지스로마이신의 병합 요법을 권고하지 않는다. (근거수준: 높음)

### ○ 기타 항바이러스 관련 기본 정보

클로로퀸은 오랜 시간 말라리아 및 Q열 리켓치아(*Coxiella burnetii*), *Tropheryma whipplei* 같은 세포 내 세균 감염의 치료 약제로 쓰여졌으며, 핵 중합효소 억제제로서 시험관 내 실험 상 다식체의 수소 이온 농도를 증가시키고, SARS-CoV의 세포 수용체의 당화를 억제하여 세포와 바이러스 간의 결합을 방해하는 것으로 알려져 있다 [16-18]. 하지만 지난 몇 년 동안 임상에서의 클로로퀸에 대한 수요가 줄어들면서 생산과 공급이 감소하였고, 대신에 1946년에 개발된 클로로퀸의 아날로그 제형인 하이드록시클로로퀸이 그 자리를 대체하게 되었다. 하이드록시클로로퀸 역시 세포관 내 실험 상 항-SARS-CoV 효과를 가지고 있는 것으로 확인되었으며 [19], 하이드록시클로로퀸은 클로로퀸보다 장기간 복용이 가능하고, 클로로퀸보다 고용량



으로 투여해 볼 수 있다는 점, 약물 상호 작용이 더 적다는 점, 혈장의 농도보다 폐, 간, 신장, 비장 같은 조직에서의 농도가 더 높다는 점에서 비교적 안전하게 투여해 볼 수 있는 약으로 생각된다 [20, 21]. 또한 한 연구에서도 SARS-CoV-2 에 있어 하이드록시클로로퀸이 클로로퀸 보다 항바이러스 효과가 훨씬 우수한 것으로 보고한 바 있다 [22]. 코로나 19 중증 환자들의 혈장에서 고농도의 사이토카인들이 확인되고, 사이토카인 폭풍이 질병의 중증도와 관련 있는 것으로 알려져 있는데 [23], 다른 항바이러스제들과 달리 하이드록시클로로퀸은 다양한 자가 면역 질환들에서 투여된 안전하고 성공적인 항염증약제로서 다양한 사이토카인들, 특히 염증 촉진 인자들의 생산을 유의하게 낮출 수 있을 것으로 생각되어 이에 대한 효과도 기대해 볼 수 있을 것으로 생각된다 [21]. 다만, 하이드록시클로로퀸 을 사용하면 QT 연장을 동반한 심독성, 신기능 및 간기능 장애를 유발할 수 있어 이와 관련된 기저 질환이 있는 경우에 주의하여 투약해야 하며, 기존에 복용 중인 타 약물과의 상호 작용에 대해서도 신중하게 확인 후에 투여해야 할 것이다 [24]. 매크로라이드 계열 항생제인 아지스로마이신은 다양한 세균성 질환에 대한 항생제로서의 역할 뿐 아니라 SARS-CoV-2 를 포함한 다양한 바이러스 (지카, 에볼라, 라이노바이러스, 엔테로바이러스, 인플루엔자) 에 대한 항바이러스 효과 [25-29] 및 면역조절제로서도 주목을 받고 있는 약제이다 [10, 30, 31]. 이러한 이유로 코로나 19 환자들에게서 하이드록시클로로퀸 과 아지스로마이신을 병합한 치료들이 시도되기도 하였다 [32-44].

#### ○ 근거 요약 (Evidence summary)

하이드록시클로로퀸 단독 치료 및 하이드록시클로로퀸에 아지스로마이신을 병합한 치료에 대한 권고를 포함한 가이드라인은 4 개의 가이드라인이 최종 선택되었다. 상기 가이드라인이 포함한 연구는 총 31편이었고, 추가 검색을 통해 확인한 연구는 총 16편이었다. 최종 근거 표에 포함된 연구는 총 47 편으로 무작위배정 임상 시험 13 편, 관찰 연구 34편이었다. 종합된 근거 합성 결과는 다음과 같다.

하이드록시클로로퀸에 대해서 시행된 13 건의 무작위배정 임상시험 가운데 9건의 연구에서 임상 경과의 호전 혹은 중증으로의 진행 여부 (산소 투여 및 기계 환기, ECMO 등) 및 호전/악화 시까지의 시간을 추가 지표로 삼았으며, 이 중 6건의 연구에서 사망을 중점 지표로 삼았다. 6개의 무작위배정 임상시험에서 바이러스의 음전을 중점 지표로 삼았으며, 총 13건의 무작위배정 임상시험 가운데 5개의 연구에서 약물 유해 작용을 추가 지표로 삼았다.

우선 사망과 임상 경과의 호전 혹은 중증으로의 진행 여부를 중점 지표로 삼은 연구들을 살펴보면, 영국의 17개 병원에 입원했던 환자들에서 하이드록시클로로퀸의 효능을 확인했던 무작위 배정 공개 임상 시험인 RECOVERY 연구 [29]에서는 1561명이 하이드록시클로로퀸군에 배정이 되었으며, 3155명이 표준 치료군으로 배정이 되었다. 하이드록시클로로퀸 군에서 28일 내 412명의 환자들이 사망하였고 (27%), 표준 치료군에서 790 명이 사망하여 (25%), 28 일 이내 사망률에 있어 두 군 간의 유의한 차이는 없었다 (비율 비, 1.09; 95% CI, 0.97 - 1.23;  $P = 0.15$ ). 하이드록시클로로퀸군의 환자들은 표준 치료군의 환자들보다 입원 기간이 더 길었으며 (16일 *vs.* 13일), 28일 이내 생존하여 퇴원할 가능성이 더 낮았다 (59.6% *vs.* 62.9%; 비율 비, 0.90; 95% CI, 0.83 - 0.98). 또한 입원 당시 기계 환기를 하지 않았던 환자들 중에서 하이드록시클로로퀸군의 환자들이 침습적 기계 환기를 하게 되거나 사망하게 되는 빈도가 더 높았다 (30.7% *vs.* 26.9%; 위험비, 1.14; 95% CI, 1.03 - 1.27) [29]. 미국 내 34 개 병원에서 입원한 환자들을 대상으로 진행한 무작위 배정 이중 맹검 임상 시험(하이드록시클로로퀸군에 242



명, 무처치 대조군에 237명 배정) 에서 14일 째 임상 7순위 척도상 평가에서 두 군 간에 유의한 차이를 보이지 않았으며 (하이드록시클로로퀸, 6 [4-7] *vs.* 무처치 대조군, 6 [4-7]; 교정 오즈비, 1.02 [95% CI, 0.73 - 1.42]), 28일 째 사망률에 있어서도 두 군 간에 유의한 차이를 보이지 않았다 (하이드록시클로로퀸, 10.4% (25/241) *vs.* 무처치 대조군, 10.6% (25/236), (절대 차이값, -0.2% [95% CI, -5.7% - 5.3%]; 교정 오즈비, 1.07 [95% CI, 0.54 - 2.09])[45]. 미국 뉴욕 주 3개 병원에 입원했던 128명 중 하이드록시클로로퀸군에 67명, 무처치 대조군 (칼슘 시트레이트)에 61명을 배정하여 진행된 이중 맹검 무작위 배정 임상 시험에서 30일째 사망률은 두 군 간에 유의한 차이를 보이지 않았으며 (하이드록시클로로퀸 7명, 10.4% *vs.* 무처치 대조군 6명, 9.8%,  $P=1.0$ ), 평균 입원 기간도 두 군 간에 유의한 차이를 보이지 않았다 (하이드록시클로로퀸, 9.75 ( $\pm 10.3$ ) 일 *vs.* 무처치 대조군, 6.80 ( $\pm 5.92$ )일,  $P=0.053$ ). 해열 및 무산소 치료 기간도 두 군 간에 유의한 차이가 없었으며, 14일 째 임상 중등도 점수에서도 두 군의 유의한 차이는 없었다 ( $P=0.354$ ) [46]. 브라질에서 진행된 다기관 무작위배정 공개 임상 시험에서는 표준 치료군 (173명), 표준 치료에 하이드록시클로로퀸을 병합한 군 (159명), 표준 치료에 하이드록시클로로퀸, 아지스로마이신을 병합한 군(172명) 으로 나누어 진행하였는데, 15일 째 임상 7순위 척도상 평가에 있어 각각의 군을 비교하였을 때 유의한 차이를 보이지 않았다 (하이드록시클로로퀸 + 아지스로마이신 대 표준 치료: 오즈비, 0.99; 95% CI, 0.57 - 1.73;  $P=1.00$ ; 하이드록시클로로퀸 대 표준 치료: 오즈비, 1.21; 95% CI, 0.69 - 2.11;  $P=1.00$ ; 하이드록시클로로퀸 + 아지스로마이신 대 하이드록시클로로퀸: 오즈비, 0.82; 95% CI, 0.47 - 1.43;  $P=1.00$ ) [44]. 이집트에서 진행된 다기관 무작위배정 임상 시험에서는 하이드록시클로로퀸 군과 표준 치료 군에 각각 97명씩 배정되었는데 두 군 간에 기계 환기를 하게 되는 빈도에 있어서 유의한 차이가 없었으며 (하이드록시클로로퀸, 4명, 4.1% 대 표준 치료, 5명, 5.2%,  $P=0.75$ ), 두 군 간에 전체적인 사망률에 있어서도 유의한 차이가 없었다(하이드록시클로로퀸 군 6명 (6.2%) 대 표준 치료군 5명(5.2%),  $P=0.77$ )[47]. 중국 상하이의 한 병원에서 중등도 코로나 19 환자 30명을 대상으로 진행한 무작위배정 임상 시험 (하이드록시클로로퀸군에 15명, 표준 치료군에 15명씩 배정)에서는 입원 후 해열까지의 기간도 하이드록시클로로퀸군에서 1일(0-2), 표준 치료군에서 1일(0-3) 소견을 보여 두 군 간에 유의한 차이를 보이지 않았으며, 흉부 컴퓨터 단층 촬영상 하이드록시클로로퀸군에서 5명 (33.3%), 표준 치료군에서 7명 (46.7%)이 폐렴의 악화 소견을 보였으나 이후 시행한 흉부 컴퓨터 단층 촬영상 모든 환자에서 회복되는 소견을 보였다. 또한 입원 후 바이러스 음전시까지 입원 기간이 하이드록시클로로퀸군에서 4일 (1-9), 표준 치료군에서 2일 (1-4) 소견을 보였으나 통계적으로 유의한 차이를 보이지 않았다 ( $P>0.05$ ). 하지만 이 연구는 등록된 환자 수가 매우 적어 더 많은 수의 환자들을 대상으로 하는 연구에서 재확인이 필요할 것으로 생각된다[48]. WHO에서 진행한 무작위배정 임상 시험인 SOLIDARITY trial 에서도 954명이 배정된 하이드록시클로로퀸군과 906명이 배정된 표준 치료군을 비교하였을 때, 신중 코로나 입원 환자들의 전체 사망률은 두 군 간에 유의한 차이를 보이지 않았으며 (하이드록시클로로퀸, 11% (104/947) *vs.* 표준 치료군, 9.3% (84/906); 위험비, 1.19; 95% CI, 0.89 - 1.59;  $P=0.23$ ), 연구 시작 후 기계 환기 시작 여부 (하이드록시클로로퀸, 8.8% (75/862) *vs.* 표준 치료군, 8% (66/824)), 입원 기간에 있어 유의한 차이는 보이지 않았다[11].

노르웨이에서 입원한 중등도/중증 코로나 19 환자들을 대상으로 진행한 무작위배정 공개 임상 시험에서 첫 임상 증상 발생 후 평균 8일째 시작한 하이드록시클로로퀸군(27명)의 5일 후 바이러스 음전 효과는 표준 치료군(26명)에 비해 의미 있는 결과를 보여주지 못했다(하이드



록시클로로퀸군, 0.24 (95% CI 0.03 - 0.46)  $\log_{10}$  RNA copies/mL/24 h 대 표준 치료군, 0.14 (95% CI -0.10 - 0.37)  $\log_{10}$  RNA copies/mL/24 h (두 군 간의 감소율 차이 0.11 [95% CI -0.21 - 0.43]  $\log_{10}$  RNA copies/mL/24 h.)[49]. 중국에서 코로나 19로 입원한 150명 (148명이 경증/중등도 환자, 2명이 중증 환자)을 대상으로 시행한 다기관 무작위배정 공개 임상 시험 (하이드록시클로로퀸군에 75명, 표준 치료군에 75명씩 배정)에서는 28일까지 바이러스 음전율이 두 군 간에 유의한 차이를 보이지 않았다. (하이드록시클로로퀸, 85.4% (95% CI 73.8 - 93.8%) 대 표준 치료군, 81.3%, 95% CI 71.2 - 89.6%)[50]. 중국 우한시에서 중등도 코로나 19 입원 환자 48명을 대상으로 한 무작위배정 공개 임상 시험에서 클로로퀸군에 18명, 하이드록시클로로퀸군에 18명, 표준 치료군에 12명이 배정되었고, 연구 시작 시점부터 임상적인 회복까지 걸리는 시간은 클로로퀸군에서 5.5일 (3.25 - 7.5), 하이드록시클로로퀸군에서 6일 (3-8), 표준 치료군에서 7.5일 (5-16.25)였으며, 각각 클로로퀸군과 표준 치료군을 비교 ( $P=0.019$ ), 하이드록시클로로퀸군과 표준 치료군을 비교하였을 때 유의한 차이를 보였다( $P=0.049$ ). 바이러스 음전까지의 시기도 클로로퀸군에서 2.5일 (2.0 - 3.8), 하이드록시클로로퀸군에서 2일 (2-3.5), 표준 치료군에서 7일 (3-10) 소견을 보였으며 ( $P=0.006$ ), 클로로퀸과 하이드록시클로로퀸군 모두 표준 치료군에 비해 입원 기간을 단축시켰으며, 흉부 컴퓨터 단층 촬영상 표준 치료군에 비해 큰 임상적 호전 소견을 보였다. 본 연구에서는 중등도 코로나 19 환자의 치료에 있어 클로로퀸 혹은 하이드록시클로로퀸군이 효과가 있는 것으로 보고하였으나 전체 등록된 환자 수가 매우 적어 더 많은 수의 환자들을 대상으로 하는 연구에서 재확인이 필요할 것으로 생각된다[51]. 스페인에서 증상 5일 이내의 경증 코로나 19 환자 293명을 대상으로 한 무작위배정 공개 임상 시험(하이드록시클로로퀸군에 136명, 표준 치료군 157명에 배정)에서는 3일 째, 7일 째 바이러스 농도를 낮추는데 있어 두 군 간에 유의한 차이를 보이지 않았으며 (3일째, 하이드록시클로로퀸군. -1.41 *vs.* 표준 치료군, -1.41  $\log_{10}$  copies/mL; 7일 째, 하이드록시클로로퀸군 -3.44 *vs.* 표준 치료군 -3.37  $\log_{10}$  copies/mL), 하이드록시클로로퀸 치료가 입원의 위험도를 낮추지 못했으며 (하이드록시클로로퀸군 5.9% 대 표준 치료군 7.1%), 임상 증상의 회복 기간을 단축시키지도 못하였다 (하이드록시클로로퀸군 10일 *vs.* 표준 치료군 12일). 즉 본 연구에 의하면 경증 코로나 19 치료에 있어 조기에 하이드록시클로로퀸을 치료하였음에도 표준 치료 이상의 의미 있는 결과를 확인할 수 없었다[52]. 미국과 캐나다에서 증상 발생 4일 이내의 입원하지 않은 경증 코로나 19 환자들을 대상으로 시행된 다기관 무작위배정 이중맹검 임상 시험에 의하면 212명의 하이드록시클로로퀸군과 211명의 무처치 대조군 (미국: 엽산, 캐나다: 유당 처방)를 비교하였을 때 14일 간 증상 중증도에 있어 두 군 간에 유의한 차이가 없었으며 (증상 중증도의 차이: 상대적인 수치, 12%; 절대적인 수치, -0.27 point [95% CI, -0.61 - 0.07 point];  $P=0.117$ ), 14일 째 무처치 대조군(30%, 59/194)에 비해 하이드록시클로로퀸군 (24%, 49/201)에서 증상이 지속되는 것이 덜 하였으나 두 군 간에 유의한 차이는 보이지 않았다 ( $P=0.21$ )[53]. 다만에서 증상 발생 4일 이내의 경증/중등도 코로나 19 환자를 대상으로 다기관 무작위 대조군 공개 연구와 후향적 연구를 동시에 진행하였다. 다기관 무작위배정 공개 임상 시험에는 총 33명이 등록되어 하이드록시클로로퀸군에 21명, 표준 치료군에 12명이 배정되었으며, 이 중 하이드록시클로로퀸군에서 1명(4.8%), 표준 치료군에서 2명의 환자(16.7%)에서 아지스로마이신이 동시에 투약 되었다. 연구 시작 후 입원 14일까지 바이러스가 음전 되는 기간은 하이드록시클로로퀸군에서 5일 (1-9), 표준 치료군에서 10일 (2-12)로 두 군 간에 유의한 차이는 보이지 않았으며 ( $P=0.4$ ), 14일 째 하이드록시클로로퀸군에서 81% (17/21), 표준 치료군에서 75% (9/12)에서 바이러스가 음전된 소견을 보였다 ( $p=0.36$ ). 14일 째까지 하이드록시클로로퀸군의 28.6%와 표준 치료군의 41.7%에서 임상적인 회복이 관찰되었으나 두 군 간의 유의한 차



이는 보이지 않았다( $P = 0.51$ ). 후향적 연구에는 37명이 등록되었으며, 하이드록시클로로퀸 군에 28명, 표준 치료군에 9명이 배정되었다. 입원 14일 쯤 하이드록시클로로퀸군의 42.9% (12/28), 표준 치료군의 55.6% (5/9) 에서 바이러스가 음전된 소견을 보였다 ( $P = 0.70$ )[54].

관찰 연구 중에서는 하이드록시클로로퀸 단독 혹은 아지스로마이신과의 병합 요법이 코로나 19로 인한 사망률을 낮추거나 임상적인 호전에 도움이 된다는 연구들 [43, 55-58] 및 입원하지 않은 코로나 19 환자의 초기 단계에 하이드록시클로로퀸에 스테로이드를 병합하여 투여할 경우 입원 확률을 50-60%까지 낮출 수 있다는 연구가 있으나[59] 이에 반해 사망률을 낮추거나 도움이 되지 않고, 오히려 부정맥을 악화시킨다는 연구들도 많이 보고되고 있다 [32, 40-42, 60-65]. 하이드록시클로로퀸이 바이러스 음전을 단축시키는 데 효과가 있으며 [34], 하이드록시클로로퀸에 아지스로마이신 병합 요법이 바이러스 음전을 단축시킨다는 연구가 있는 반면에 [66], 하이드록시클로로퀸이 바이러스 음전에 도움이 되지 못한다는 연구 결과들도 보고되어 있다 [36, 67]. 바이러스 음전에 하이드록시클로로퀸보다 로피나비르/리토나비르가 효과가 있다는 연구가 있으나 [68, 69] 두 약제 모두 효과가 없다는 연구도 있다[70].

#### ○ 권고 고려사항

##### 1. 근거 수준

하이드록시클로로퀸 단독 요법 및 하이드록시클로로퀸, 아지스로마이신 병합 요법에 대한 현재 보고되어 있는 무작위 배정 임상 시험, 관찰 연구, 문헌 고찰 등을 종합하여 판단하여 볼 때 사망, 기계 환기를 요하는 경우, 28일째 임상적 회복에 관한 근거 수준은 높았으나(high), 약제로 인한 이상 반응 등은 이벤트가 발생한 전체 환자 수가 충분치 않고, 이중 맹검이 되지 않은 경우가 많아 근거 수준은 중등도로 판단이 된다(moderate). 바이러스 음전 여부 및 임상 증상 호전까지의 시간은 등록된 전체 환자의 수가 충분하지 않고, 대규모 연구로 진행되지 않았으며, 일관된 결과를 보이지 않아 근거 수준은 낮은 것으로 판단된다. 따라서 핵심적인 결과지표들의 근거수준에 따라 종합 근거수준은 '높음'(high)으로 평가한다.

##### 2. 이득과 위해

코로나 19 환자의 치료에 있어 하이드록시클로로퀸 단독 치료 혹은 아지스로마이신과의 병용 치료 시 사망률 및 중증 상태로 진행되는 것에 대한 개선, 입원 기간 단축, 바이러스 음전 기간 단축 등에 대한 현재까지 보고된 여러 데이터들을 종합하면 효과가 없는 것으로 판단되거나 약제 특성상 QT 간격이 증가되어 부정맥이 유발되는 등 여러 부작용들이 보고되어 있는 상태로 잠재적인 이득보다 위해가 크다고 판단된다.

##### 3. 환자의 가치와 선호도

아직까지 코로나19 환자의 치료제의 선택은 매우 제한되어 있으며 치료 효과를 증명한 약제 또한 드물다. 하지만 상기 약제의 경우 임상적 효과는 없는 반면 부정맥 유발 등의 부작용이 예상되는 점을 고려하면 선호도는 낮은 것으로 예상된다.

##### 4. 자원(비용 포함)

은 국내에서 말라리아, 류마티스 관절염, 루프스, 지연 피부 포르피린증에 대해 상용적으로 투여되고 있는 약제로 수급이 용이하며, 국내에서 유통되고 있는 제형인 경구 옥시클로린

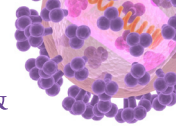

100 mg 에 보험 수가 130원, 일반 수가 570원으로 책정되어 있다. 아지스로마이신 역시 국내에서 다양한 세균성 질환에 투여되는 항생제로 수급이 용이하며, 경구 지스로맥스 250 mg 에 보험 수가 920원, 일반 수가 2,020원으로 책정되어 있다.

## 5. 국내 수용성과 적용성(Acceptability and Applicability)

### 1) 다른 국가 임상진료지침과의 권고 비교

ACPG 가이드라인에서는 신종 코로나 환자의 치료에 하이드록시클로로퀸 투여를 하지 않을 것을 권고하고 있으며, NIH 에서는 입원 환자의 경우 하이드록시클로로퀸 단독 혹은 아지스로마이신 병용 투여를 하지 않을 것을 권고하고 있으나 비입원 환자의 경우에는 임상 시험 외의 하이드록시클로로퀸 단독 혹은 아지스로마이신 병용 투여를 하지 않을 것을 권고하고 있다. IDSA 가이드라인에서도 입원 환자에서 하이드록시클로로퀸 단독 혹은 아지스로마이신 병용 투여를 하지 않을 것을 권고하고 있다. 중국 가이드라인에서는 클로로퀸 혹은 하이드록시클로로퀸 투여 효과에 관한 일관적인 데이터가 없어 투여에 있어 유보적인 입장이나 하이드록시클로로퀸에 아지스로마이신 병합 요법은 권고하지 않고 있다.

### 2) 국내 수용성과 적용성 평가

한국보건의료연구원 임상진료지침 핸드북(2015)에서 개발된 국내 수용성과 적용성 평가도구를 활용하여 이들 4개 진료 지침에 대한 국내 수용성 및 적용성 평가를 수행하였다.

## 6. 기타 고려사항

2020.4.27 미국 식약처에서 신종 코로나 환자의 치료 약제로 하이드록시클로로퀸의 긴급 사용 승인을 허가하였으나 2020.6.17 WHO 에서 하이드록시클로로퀸에 대한 SOLIDARITY 와 RECOVERY 임상 연구의 중간 결과 상 표준 치료에 비해 입원 환자의 사망률을 낮추지 못하여 SOLIDARITY 임상 연구를 중단한다고 선언하였으며, 미국 식약처에서 신종 코로나 환자의 치료 효과에 대한 데이터가 부족한 반면 부정맥 발생 등의 심각한 부작용들이 보고되어 긴급 사용 승인을 취소하였다.

## CQ3 로피나비르/리토나비르(Lopinavir/ritonavir)

### ○ 문장형 임상질문

코로나 19 환자에게 lopinavir/ritonavir 투여가 도움이 되는가?

### ○ PICO 요소

| P         | I           | C               | O                                                                                                                                                                                             | 비고          |
|-----------|-------------|-----------------|-----------------------------------------------------------------------------------------------------------------------------------------------------------------------------------------------|-------------|
| 코로나 19 환자 | 로피나비르/리토나비르 | 표준치료 또는 무처리 대조군 | <ul style="list-style-type: none"> <li>· 사망</li> <li>· 산소공급 필요</li> <li>· 인공기계호흡기 장착</li> <li>· 일상활동 가능성, 입원 필요 여부, 산소 공급 필요 여부를 판단하는 임상 스케일</li> <li>· 입원 기간</li> <li>· 바이러스 배출기간</li> </ul> | 무작위 배정 임상연구 |

### ○ 권고문

1. COVID-19 환자에게 로피나비르/리토나비르의 투여를 권고하지 않는다. (근거수준: 높음, 권고등급: C)

#### ○ 로피나비르/리토나비르 관련 기본 정보

로피나비르/리토나비르는 HIV 바이러스 복제를 억제하는 단백질 분해효소 억제제로 2개의 항바이러스제 성분으로 구성되어 있다. 2000년도에 미국에서 시판이 허가된 이후 전 세계에서 HIV 치료제로 유통되어 사용되고 있다. 그러나 다른 HIV 약제들보다 복용 방법이 불편하고, 설사와 구토와 같은 소화기계 장애가 흔히 동반되어 현재 일차치료 약제로 추천되고 있지 않다. 2002년도 중증 급성 호흡기 증후군(severe acute respiratory syndrome, SARS) 유행 당시에 코로나 바이러스에 임상적으로 효과가 있다는 연구 결과가 있었다[71]. 2020년도 신종 코로나바이러스 유행 초기에 실험실 연구에서 SARS-CoV-2 바이러스를 억제하는 효과가 있다는 연구 결과가 발표되었다[72].

#### ○ 근거 요약 (Evidence summary)

코로나 19 환자를 대상으로 로피나비르/리토나비르 사용에 대한 권고를 포함한 가이드라인 6개가 최종 선택되었다. 상기 가이드라인에 포함된 연구는 총 6편이었고, 추가 검색을 통해 확인한 연구는 총 11편이었다. 이들 중 다른 항바이러스제와 병합 투약으로 연구가 진행된 무작위 배정 임상 연구 1편과, 대조군이 다른 항바이러스제 투여군만으로 구성된 무작위 배정 임상연구 2편, 연구 유형이 관찰 연구인 10편은 제외하였다. 따라서, 최종 근거표에 기술된 연구들은 로피나비르/리토나비르 치료군과 항바이러스제를 투약하지 않은 대조군으로 구성된 무작위 배정 임상연구로 총 4편이다.

앞에서 최종 선정된 임상연구들 중 연구 대상자 수가 가장 많고 질이 높은 연구는 RECOVERY Collaborative Group에서 시행했던 RECOVERY (randomized evaluation of COVID-19 therapy) 연구이다[73]. 이 연구는 연구자 주도의 눈가림 없는 공개 연구로 영국의 176개 의료기관이 참여하였고 대상 환자는 COVID-19 감염으로 입원한 18세 이상의 성인이었다. 로피나비르/리토나비르 투여군 1,616명, 항바이러스제 비투여군은 3,424명을 최종 분석하였으며, 연령, 성별, 인종, 기저 질환, 증상 기간, 입원 시 산소 요구도 등 기초 특성에서 두 군은 차이를 보이지 않았다. 28일 사망률은 각각 23%와 22%로 차이가 없었고 (비율 비 1.03, 95% CI 0.91 - 1.17;  $P = 0.60$ ), 인공기계호흡기 장착률 또한 각각 10%와 9%로 두 군 사이에 유의한 차이를 보이지 않았다[73].

WHO가 주도하여 전 세계 30개 국가의 405개 병원에서 렘데시비르, 하이드록시클로로퀸, 로피나비르/리토나비르, 인터페론 beta-1a 약물에 대한 대규모 무작위 배정 임상 연구가 진행되었다[11]. 이 연구는 코로나 19 감염으로 입원한 18세 이상의 성인들 중 산소공급이 필요한 중등도 이상의 환자들을 대상으로 진행하였다. 로피나비르/리토나비르 투약 연구는 총 2,791명의 환자가 모집되었고 최종 로피나비르/리토나비르 1,399명, 비약물 대조군 1,372명을 대상으로 분석을 시행하였다. 입원 중 사망률은 각각 9.7%, 10.3%로 차이가 없었으며 (비율 비 1.00, 95% CI 0.79 - 1.25;  $P = 0.97$ ), 치료 중 새롭게 인공기계 호흡기를 장착한 환자 비율 또한 각각 9.8%, 9.6%로 두 군 간의 차이는 없었다. (비율 비 0.97, 95% CI 0.79 - 1.25;  $P = 0.97$ )

신종 코로나바이러스 유행 초기 로피나비르/리토나비르 치료제의 효과에 대해 처음으로 시행된 RCT 연구가 있다[74]. 이 연구는 중국 우한 지역의 한 병원에서 시행된 연구로 18세 이상의 성인 중 산소 공급이 필요한 중등도 이상의 환자들을 대상으로 연구를 진행되었다. 총 199명의 환자 중 99명은 로피나비르/리토나비르를 투약하였고, 나머지 100명은 비약물적 치료



를 시행하였다. 이전의 입원 치료를 받았던 중증 인플루엔자 환자 연구에서 임상적 호전 여부를 판단하기 위해 사용했던 임상 스케일(일상활동 가능성, 입원 필요 여부, 산소 공급 필요 여부)을 본 연구에 차용하였다. 측정된 임상 호전 여부 평가 상 위험비는 1.31 (95% CI 0.95 – 1.80)로 개선의 효과가 없었고, 28일 사망률 또한 19.2% *vs.* 25.0% (95% CI 17.3 – 5.7)로 두 군 간의 차이는 없었다. 이외 바이러스 배출 기간과 입원 기간 또한 큰 차이를 보이지 않았다. 다만, 로피나비르/리토나비르 치료군에서 소화기계의 불편감으로 13명(13.8%)이 중도에 투약을 중단하였다.

앞서 언급한 대규모 연구 이외 나머지 한 연구는 연구 대상자 수가 86명이고, 그 중 로피나비르/리토나비르 치료군이 34명으로 적어 결과에 대해 신뢰도가 낮을 수 있지만, 경증 환자와 중등도 환자 모두에서 비약물적 중재군과 비교하여 바이러스 배출 기간과 임상증상 호전 지표 모두에서 차이가 없음으로 보고되었다[75].

현재까지 문헌에서 보고된 무작위 배정 임상연구들에서는 로피나비르/리토나비르의 임상적 개선 효과와 바이러스 배출 기간의 단축, 사망률 감소와 같은 임상 지표들의 결과를 볼 때 치료의 효과가 없는 것으로 결론을 내리고 있다. 물론 로피나비르/리토나비르 약제를 코로나 19 감염 환자에게 사용할 경우 약의 적정 용량에 대해 논란이 있을 수 있을 수 있다. 그러나 HIV 환자에게 사용하는 용량으로 폐에서 유효 농도<sub>90</sub> 이상 농도가 유지된다는 보고가 있기 때문에 약 용량 변경으로 추가적인 임상적 개선 효과의 가능성은 없을 것으로 보인다[76]. 또한, 인공기계호흡기를 장착하는 환자의 경우 경관으로 약을 투약해야 하기 때문에 약동학에 변동이 있을 수 있으나, 검토한 무작위 배정 임상연구들에서 인공기계호흡기를 장착하지 않은 환자군에서도 동일하게 효과가 없다고 보고 되었다. 오히려 약물의 이상반응으로 약물을 중단해야 하는 사례가 있었다는 점에서 코로나 19 감염 환자에게 로피나비르/리토나비르 투여는 권장되지 않는다.

## ○ 권고 고려사항

### 1. 근거수준

근거가 되는 연구들 모두 눈가림이 없는 공개 연구로 진행된 제한점이 있다. 그러나 모집단이 충분하고, 연구 방법이 적절하고 결과 지표가 명확하며 동일한 경향의 결과도 출되었다는 점에서 종합 근거 수준은 ‘높음(High)’으로 판단한다.

### 2. 이득과 위해

로피나비르/리토나비르 투여군에서의 안정성과 관련하여 자세하게 기술한 연구 결과를 살펴보면, 이상반응 보고 비율은 중재군에서 48.4%, 비중재군에서 49.5%로 비슷했다[74]. 이는 감염병 자체에 의한 새로운 증상 발현과 혈액 검사 결과의 변화, 그리고 병용 투여 약물에 의한 이상 반응이 혼재되어 있을 수 있기 때문에 해석이 제한적이다. 그러나 로피나비르/리토나비르 치료군에서 13.8%의 환자가 소화기계 불편감으로 약물을 중단하였다는 보고에 대해서는 주의가 필요하다. 약물 치료로 이득이 없기 때문에 이득 대비 위해가 더 높을 수 있다.

### 3. 환자의 가치와 선호도

로피나비르/리토나비르 약제의 사용으로 임상적 호전이 없다면 환자들의 선호는 없을 것이다.

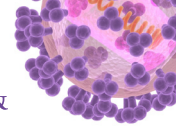

#### 4. 자원(비용 포함)

HIV 환자들을 대상으로 시장에 유통되고 있는 약물로 접근성이 높지만, 비용 대비 효과는 낮을 것이다.

#### 5. 국내 수용성과 적용성(Acceptability and Applicability)

##### 1) 다른 국가 임상진료지침과의 권고 비교

(WHO guideline, IDSA (Centers for Disease Control and Prevention guideline, Infectious Diseases Society of America guideline), 캐나다(BC Centre for Disease Control: Treatments guideline), 호주(Australian clinical practice guideline), 뉴질랜드(NSW Health interim guidance on use of antiviral and immunomodulation therapy in COVID-19) 치료 지침 모두에서 치료적, 예방적으로 로피나비르/리토나비르를 사용하지 않도록 권고하고 있다. 권고비교표는 부록에 제시하였다.

##### 2) 국내 수용성과 적용성 평가

한국보건 의료 연구원 임상진료지침 핸드북(2015)에서 개발된 국내 수용성과 적용성 평가도구를 활용하여 이들 5개 진료 지침에 대한 국내 수용성 및 적용성 평가를 수행하였다.

#### 6. 기타 고려사항

없음

#### CQ4 기타 항바이러스제(파비피라비르, 리바비린, 우미페노비르, 발록사비르 마복실 등)

##### ○ 문장형 임상질문

코로나 19 환자에게 파비피라비르, 리바비린, 우미페노비르, 발록사비르 등 기타 바이러스 억제 효과가 있다고 알려진 약제의 투여가 표준치료 또는 무처치 대조군에 비하여 치료 효과 및 안전성이 있는가?

##### ○ PICO 요소

| P         | I                                 | C                  | O                                                                              | 비고                           |
|-----------|-----------------------------------|--------------------|--------------------------------------------------------------------------------|------------------------------|
| 코로나 19 환자 | 파비피라비르<br>리바비린<br>우미페노비르<br>발록사비르 | 표준치료 또는<br>무처치 대조군 | · 사망<br>· 중증 경과(산소 투여, HFNC, MV, ECMO)<br>· 중환자실 치료<br>· 중환자실 재실 기간<br>· 입원 기간 | 무작위 배정 임상연구,<br>비교군이 있는 관찰연구 |

##### ○ 권고문

코로나 19 환자에게 파비피라비르, 리바비린, 우미페노비르, 발록사비르 마복실 등 기타 바이러스 억제 효과가 있다고 알려진 약제 투여를 중증도와 상관없이 권고하지 않는다. (근거수준: 낮음, 권고등급: C)

##### ○ 기타 항바이러스 관련 기본 정보

파비피라비르(아비간®, T-705)는 다양한 RNA 바이러스에 대해 효과가 있는 것으로 알려진 약제로서, 그 기전이 확실치 않으나 아마도 퓨린 유사체로 작용하여 바이러스의 RNA 의존성 RNA 중합효소의 작용을 억제하는 것으로 생각된다[77, 78]. SARS-CoV-2에 대해서는 억제 실험 결과 비교적 높은 농도(half-maximal effective concentration, EC<sub>50</sub>=61.88 μM, selectivity index >6.46)에서 바이러스 감염을 억제하는 것으로 보고된 바 있다[79].



리바비린은 몇몇 시험관 내 연구에서 고농도에서 SARS-CoV나 MERS-CoV의 증식을 억제하였다[80-83]. 그러나 임상에서 사용하는 일반적인 농도로는 SARS-CoV나 MERS-CoV 증식이 억제되지 않고, 인체에 독성이 나타날 정도의 농도에서야 억제가 되었다. 리바비린과 인터페론의 병합요법의 경우 몇몇 시험관 내 연구에서 SARS-CoV에 대해 사용할 경우 리바비린의 필요 농도를 낮추고 상승 효과가 나타나는 것이 확인되었다[84-86].

우미페노비르(아비돌®)는 러시아에서 개발된 항바이러스제로서, 러시아와 중국에서 인플루엔자 감염의 예방과 치료 목적으로 승인되어 있다. 이 약제는 indole 유도체로서 바이러스와 숙주 세포의 막융합을 억제하는 것을 포함하여 다양한 기전을 통해 광범위한 항바이러스 효과를 가진다고 알려져 있다[87]. Vero E6 세포를 이용한 실험에서는 SARS-CoV-2에 대해서도 바이러스의 부착과 내복소체(endolysosome)로부터의 방출을 방해하여 감염을 억제하는 것으로 보고된 바 있다[88].

발록사비르 마복실 (조플루자®)의 대사 산물인 발록사비르는 인플루엔자 바이러스의 중합효소 혼합체 중 polymerase acidic (PA) 단백질 서브유닛의 억제제로서, 이 단백질에 의한 cap-의존형 핵산내부핵산분해효소(endonuclease) 활성을 억제하여 인플루엔자 바이러스의 복제를 막는다[89]. 세포 실험(Vero E6)에서 발록사비르가 SARS-CoV-2에 대한 항바이러스 효과가 있다고 보고된 바 있으나[90], 반대로 그렇지 않다는 보고도 있다[88].

#### ○ 근거 요약 (Evidence summary)

파비피라비르, 리바비린, 우미페노비르, 발록사비르 마복실에 대한 권고를 포함한 가이드라인은 6개 가이드라인이 최종 선택되었다. 상기 가이드라인이 포함한 연구는 총 15편이었고, 추가 검색을 통해 확인한 연구는 총 5편이었다.

최종 근거표에 포함된 연구는 총 20편으로 무작위배정 임상시험 9편, 관찰 연구 11편이었다. 종합된 근거 합성 결과는 다음과 같다.

파비피라비르와 우미페노비르에 대해서 시행된 6건의 무작위배정 임상시험 가운데 일차 지표로 임상적 호전을 설정한 것은 1개였는데, 이 연구는 240명의 환자를 1:1로 무작위 배정하여 파비피라비르와 우미페노비르 가운데 한가지 약제를 투여한 뒤 7일째 임상적 호전을 비교하였다. 72시간 이상 발열, 빈호흡, 저산소증이 없는 임상적 호전에 도달한 비율은 파비피라비르 투여군에서 61.2%, 우미페노비르 투여군에서 51.7%로 양군 사이에 유의미한 차이가 없었으며( $p = 0.140$ ), 산소 투여 이상의 호흡 치료가 필요한 중증으로의 이행 비율에도 유의미한 차이가 없었다[91]. 파비피라비르에 대해 시행된 나머지 3개의 RCT는 호흡기 분비물에서 PCR 음전을 일차 지표로 선택하였고, 모두 파비피라비르를 투여받은 환자에서 다른 약제를 투여하거나 약제를 투여하지 않은 군, 혹은 파비피라비르를 늦게 투여한 군에 비하여 음전 시점에 차이가 없었다[90, 92, 93]. 일부 연구는 해열에 걸리는 시간을 임상 지표로 제시하였으나, 모두 사망이나 중증 경과로의 진행과 같이 중요한 임상 지표를 주요 지표로 관찰하지 않았고, 보조 지표로 관찰한 경우에도 양군 간에 차이가 없었다. 파비피라비르에 대한 관찰 연구 2건은 모두 로피나비르/리토나비르와 비교한 것으로, 두 약제 모두를 인터페론- $\alpha$  흡입제와 병용하였을 때 파비피라비르 투여군에서 PCR 음전과 흉부 컴퓨터 전산 촬영상 호전이 더 빠르다고 보고하였으나 임상 지표는 관찰하지 않았다[94]. 하이드록시클로로퀸과 병



합한 연구에서는 양 군 사이에 사망에는 차이가 없었으나 중환자실 재원 기간은 파비피라비르 투여군에서 더 짧았다고 보고하였으나, 두 약제를 동일한 시기에 투여한 것이 아니라 코로나19 유행 후기에 파비피라비르로 일차 약제가 변경되었다는 제한점이 있다[95].

우미페노비르에 대해 시행된 나머지 2건의 무작위 배정 임상 연구는 모두 탐색적 임상 시험으로서, PCR 음전이나 발열 및 호흡기 증상의 소실, 중증으로의 진행 등에 있어 유의미한 차이가 관찰되지 않았다[75, 96]. 우미페노비르에 대한 관찰 연구는 총 6건으로, 이 가운데 4건은 PCR 음전을 일차 지표로 설정하였다. 그 중 로피나비르/리토나비르 혹은 중의학 제제를 대조군으로 한 연구들에서는 파비피라비르 투여군에서 음전 속도가 빠르다고 보고하였으나, 항바이러스제를 투여하지 않은 대조군을 대상으로 한 연구에서는 양 군에 유의한 차이가 없었다[97-100]. 임상 지표를 관찰한 경우에도 발열과 기침의 소실 여부를 대상으로 하였고 사망이나 중증 경과로의 이행, 퇴원 등 의미 있는 임상 지표를 보고하지 않았다[101, 102].

리바비린에 대해 시행된 무작위 배정 임상 연구는 모두 3건이 확인되었다. 한 연구에서는 리바비린, 인터페론- $\beta$ 1b, 로피나비르/리토나비르 병합 투여군을 로피나비르/리토나비르 단독 투여군과 비교하였을 때 PCR 음전과 임상적 호전(증상, NEWS2, SOFA), 재원 기간에는 유의한 이득이 있었으나 산소 투여 이상의 중증 경과에는 차이가 없었고 사망은 양 군 모두에서 발생하지 않았다[103]. 하지만 리바비린+ 인터페론- $\alpha$ , 로피나비르/리토나비르+ 인터페론- $\alpha$ , 리바비린+ 로피나비르/리토나비르 + 인터페론- $\alpha$ 의 3개 병합 요법을 비교한 연구에서는 PCR 음전까지 걸리는 시간에 유의한 차이가 없었고 오히려 3제 병합군에서 위장관계 부작용이 더 흔하게 발생하였다[104]. 리바비린과 소포스부비르/다클라타스비르 병합 투여를 항바이러스제를 투여하지 않은 대조군과 비교한 소규모 무작위 배정 임상 연구에서는 병합 요법군에서 재원 기간이나 중환자실 입원, 사망에 유의한 차이가 없었으나 양 군의 기저 특성에 차이가 있었고 환자 수가 적어서 결론을 내리기 어려웠다[105]. 리바비린에 대해 시행된 3건의 관찰 연구 가운데 두 건의 후향적 연구에서는 리바비린 단독 투여군을 항바이러스제 미투여군과 비교하거나 로피나비르/리토나비르+ 인터페론- $\alpha$  병합 투여군을 리바비린을 포함한 3제 병합 투여군과 비교하였을 때에 PCR 음전이나 입원 기간, 사망에 의미 있는 차이가 없었다[106-107]. 로피나비르/리토나비르 + 하이드록시클로로퀸을 투여한 환자 가운데 추가로 리바비린을 투여한 군과 소포스부비르/다클라타스비르를 투여한 군을 비교한 전향적 관찰 연구에서는 리바비린에 비해 소포스부비르/다클라타스비르 투여군에서 재원 기간, 중환자실 재실, 사망이 유의하게 적었다고 보고하였으나 항바이러스제를 투여하지 않은 대조군이 없어 리바비린의 효과를 평가할 수 없었다[108].

발록사비르 마복실에 대해서는 1개의 RCT만 확인되었다. 이 연구는 로피나비르/리토나비르 혹은 다루나비르/코비시스타트와 인터페론- $\alpha$  흡입제를 병용 투여하면서 중재군에 추가로 발록사비르 혹은 파비피라비르를 투여한 연구로서, PCR 음전과 임상적 호전 속도 모두에 유의미한 차이가 없었다[90].

## ○ 권고 고려사항

### 1. 근거수준

파비피라비르, 리바비린, 우미페노비르, 발록사비르 마복실의 효과에 대해 연구한 무작위 배정 임상 연구와 관찰 연구 모두 여러 약제의 병용 투여, 다양한 대조군, 환자 기저 상태의 차



이, 작은 규모 등 중대한 제한점을 갖고 있었다. 특히 중요한 임상 지표인 사망, 중증 경과로의 진행, 회복 후 퇴원을 일차 지표로 설정한 연구는 매우 적었다. 주요 임상결과에서 통계적인 이득이 유의하지 않았고, 연구의 표본수가 최적표본수에 미치지 않았으며, 비뚤림 위험평가 결과에서도 우려가 있어 본 임상질문에 대한 종합 근거 수준은 '낮음(low)'으로 평가하였다.

## 2. 이득과 위해

파비피라비르, 리바비린, 우미페노비르, 발록사비르 마복실의 효과에 대해서는 소수의 무작위 배정 임상연구가 보고되어 있으나, 사망이나 중증 경과로의 진행, 회복 후 퇴원 등 중요한 임상 지표가 일차 지표인 연구는 거의 없었다. 임상 지표를 보고한 연구들에서 약물 투여군에서 일관된 이득이 관찰되지 않았으며, PCR 음전이나 CT 호전 등 비임상 지표에 있어서도 결과가 일관되지 않았다. 따라서 지금까지의 근거를 바탕으로 판단할 때 코로나 19 환자에게 이들 약제가 사망이나 중증 경과의 빈도를 줄이거나 입원 기간을 단축시킬 가능성은 낮다.

대부분의 연구에서 항바이러스제에 의한 중증 부작용이나 이로 인한 약물 중단 빈도는 대조군과 유의한 차이가 없었다. 하지만, 파비피라비르의 용량 탐색 연구에서 5% 정도에서 부작용으로 인해 약물을 중단하였다고 보고하였고, 다른 연구에서도 고요산혈증과 혈청 중성지방 혹은 알라닌 아미노기 전달효소(ALT) 상승을 보고하였다[92, 93]. 우미페노비르는 무작위 배정 임상연구에서 오심/구토가 흔하게(14.3%) 나타났다고 보고되었으나[75], 관찰 연구에서는 대조군에 비해 그 빈도가 유의하게 높지는 않았다[99, 101]. 리바비린은 단독으로 투여한 연구가 거의 없어 위해를 평가하기 어려우나, 항바이러스제를 투여하지 않은 환자들을 대조군으로 한 관찰 연구에서는 리바비린 투여군에서 실험실적 이상의 빈도가 높지 않았고 부작용에 따른 조기 중단도 없었다[107]. 하지만 한 개 무작위 배정 임상 연구에서는 로피나비르/리토나비르 + 인터페론- $\alpha$ 과 함께 3제 병합 요법 시 부작용의 빈도가 높았고, 리바비린의 부작용으로 용혈성 빈혈과 백혈구 감소가 잘 알려져 있으므로 사용에 주의가 필요하다.

## 3. 환자의 가치와 선호도

한국에서 코로나 19 환자를 대상으로 치료 약제 선택에 대한 가치와 선호도를 조사한 연구는 없다. 하지만 상기 약제들의 임상적 효과가 없거나 매우 작을 것으로 예상되는 반면, 이 약제들이 국내에서 사용이 승인되어 있지 않거나(파비피라비르, 우미페노비르), 승인된 적응증이 코로나 19와는 매우 다르거나(리바비린), 아직 사용 경험이 많지 않은(발록사비르 마복실) 점을 고려하면 선호도는 낮을 것으로 예상된다.

## 4. 자원(비용 포함)

파비피라비르와 우미페노비르는 국내에서 사용 승인이 되어있지 않아 임상시험 외의 경로로는 사용이 불가능하다. 리바비린은 사용이 승인되어 있고 가격도 전체 입원 비용에 비해 적은 편이다. 발록사비르 마복실은 비급여 약제이고 코로나 19 환자에 투여한 연구에서 2~3회 투여하였으므로 비용 부담이 큰 편이다.

## 5. 국내 수용성과 적용성(Acceptability and Applicability)

### 1) 다른 국가 임상진료지침과의 권고 비교

WHO 가이드라인에서는 파비피라비르와 우미페노비르에 대해서는 명시적으로, 기타 실험실적으로 항바이러스 효과가 있다고 알려진 약제들에 대해서는 포괄적으로 투여하지 않도록

록 권고하고 있다. 호주 가이드라인에서는 발록사비르 마복실, 파비피라비르, 우미페노비르에 대해 임상시험 외에는 투여하지 않도록 권고하고 있다.

## 2) 국내 수용성과 적용성 평가

한국보건의료연구원 임상진료지침 핸드북(2015)에서 개발된 국내 수용성과 적용성 평가도구를 활용하여 이들 5개 진료 지침에 대한 국내 수용성 및 적용성 평가를 수행하였다.

## 6. 기타 고려사항

파비피라비르와 우미페노비르는 2020년 12월 현재 국내에서 사용 승인되지 않았다. 발록사비르 마복실은 성인 및 만 12세 이상 청소년의 인플루엔자 A형 또는 B형 바이러스 감염증의 치료에 승인되어 있다. 리바비린 경구 제제의 경우 만성 C형 간염에서 인터페론 알파-2b 또는 페그인터페론 알파-2a, -2b 주사와 병용투여에 대해 승인되어 있다.

## CQ5 스테로이드 (corticosteroid)

### ○ 문장형 임상질문

코로나 19 환자에게 스테로이드 투여가 표준치료 또는 무처치 대조군에 비하여 치료효과 및 안전성이 있는가?

### ○ PICO 요소

| P               | I                                              | C                  | O                                                                                                                     | 비고                           |
|-----------------|------------------------------------------------|--------------------|-----------------------------------------------------------------------------------------------------------------------|------------------------------|
| 코로나 19<br>입원 환자 | · 덱사메타손<br>· 프레드니솔론<br>· 메틸프레드니솔론<br>· 하이드로코티손 | 표준치료 또는<br>무처치 대조군 | · 사망<br>· 기계환기/ECMO 치료<br>· 기계환기/ECMO 치료 기간<br>· 중환자실 치료<br>· 중환자실 재실 기간<br>· 중증 경과(산소 투여, HFNC, MV, ECMO)<br>· 입원 기간 | 무작위 배정 임상연구,<br>비교군이 있는 관찰연구 |

### ○ 권고문

|                                                                                           |                                                                                                                               |
|-------------------------------------------------------------------------------------------|-------------------------------------------------------------------------------------------------------------------------------|
| 5-1. 코로나 19로 인한 중증(severe) 또는 심각(critical) 환자에게 스테로이드 투여를 권고한다. (근거수준: Moderate, 권고등급: A) |                                                                                                                               |
| 5-2. 중증이 아닌 코로나 19 환자 (non-severe)에 대해서는 스테로이드 투여를 권고하지 않는다. (근거수준: Moderate, 권고등급: C)    |                                                                                                                               |
| 임상적 고려사항                                                                                  | 스테로이드 투여 용량은 하루 덱사메타손 6 mg을 7 - 10일간투여하며, 이와 역가가 같은 스테로이드를 대체해 투여 할 수 있다. (하이드로코티손 150 - 200 mg, 프레드니손 40 mg, 메틸프레드니솔론 32 mg) |

### ○ 스테로이드 관련 기본 정보

스테로이드는 강력한 항 염증, 면역 억제, 항 종양성 효과를 가지고 있으며 자가면역질환, 알레르기 반응, 천식 악화, 만성 폐쇄성 폐질환, 악성 종양 등을 포함하는 여러 상태를 치료하는데 주요 역할을 한다 [109]. 특히, 패혈증과 같은 중증 감염에서는 스테로이드가 이상 조절 면역반응 개선에 도움을 줄 가능성이 있다[110]. 40-60% 사망률을 보이는 급성호흡곤란증후군은 전신 염증반응과 관계된 호흡기능 부전의 가장 치명적인 형태로[111], 패혈증으로 인한 급성호흡곤란증후군의 발생과 악화에는 여러 순환 (circulating)과 염증 촉진 (proinflammatory) 사이토카인이 관계하고 있으며, 이런 사이토카인의 자가조절기능의 상실이 급성호흡곤란증후군의 조기 병태생리학적 원인으로 밝혀져 있다 [112, 113]. 스테로이드는 시상하부-뇌하수체-부신 축 (hypothalamic-pituitary-adrenal axis)의 가장 최종 실행기(effector)로 사이토카



인을 조절, 급성호흡곤란증후군과 같은 중증 전신적 염증을 억제시키는 효과가 있어[114], 중증 패혈증, 패혈성 쇼크 환자와 급성호흡곤란증후군 환자에서 치료 목적으로 스테로이드를 이용하기도 한다. 코로나19 이전 SARS-CoV나 MERS-CoV 감염 환자 임상 연구에서는 스테로이드 투여는 사망률을 개선시키지 못했고, 무혈성 괴사, 당뇨, 정신병 등의 부작용이 보고되었으며[84], 하기도에서 바이러스 지속적인 배출 소견이 보이기도 하여[115], 스테로이드의 일상적 사용은 권고하지 않았다. 최근 중증 패혈증, 패혈성 쇼크 환자에서 스테로이드 투여받은 환자가 그렇지 못한 환자에 비해 쇼크에서 빨리 회복하였고 사망률 개선을 보인 연구도 있으며[116, 117], 급성호흡곤란증후군 환자에서 스테로이드 투여가 사망률을 줄이고 기계 환기 일수를 감소시킨 연구도 있다[118, 119].

#### ○ 근거 요약 (Evidence summary)

스테로이드에 대한 권고를 포함한 가이드라인은 4개 가이드라인이 최종 선택되었다. 상기 가이드라인이 포함된 연구는 총 16 편이었고, 추가 검색을 통해 확인한 연구는 총 10편이었다.

최종 근거표에 포함된 연구는 총 10 편으로 무작위배정 임상시험(randomized controlled trial, RCT) 5 편, 관찰 연구 5 편이었다. 종합된 근거 합성 결과는 다음과 같다.

무작위배정 임상시험 중 가장 큰 규모로 진행된 RECOVERY (The Randomized Evaluation of COVID-19 Therapy) 연구에서 덱사메타손 6 mg 하루 한번 10일까지 투여한 군과 투여하지 않은 군에 비해 28일 사망률이 유의미 하게 줄어들었다(482/2,104[22.9%] *vs.* 1110/4321 [25.7%], age-adjusted rate ratio (RR) 0.83; 95% 신뢰구간 [CI] 0.75 - 0.93;  $P < 0.001$ )[120]. 이 사망률 개선은 기계환기가 필요한 군 (29.3% *vs.* 41.4%, RR 0.64; 95% CI 0.72 - 0.94)이나 산소치료가 필요한 군 (23.3% *vs.* 26.2%, RR 0.82; 95% CI 0.72 - 0.94)에서 나타났으나 산소치료가 필요하지 않은 환자에서는 스테로이드 투여가 사망률을 개선시키지 못했다 (17.8% *vs.* 14.0%, rate ratio 1.19; 95% CI 0.62 - 0.95). 브라질 41개 중환자실에서 코로나19감염으로 인한 중등도 또는 중증의 급성호흡곤란증후군 환자를 대상으로 시행된 CoDEX (The COVID-19 Dexamethasone RCT) 연구를 보면, 총 299명의 환자 중 5일간 덱사메타손 하루 20 mg 정주 투여 후 10 mg으로 감량 5일 추가 투여 또는 중환자실 퇴실때까지 추가 투여한 군과 대조군 1:1로 무작위 배정하여 일차 결과지표로 첫 28일간 기계환기에서 이탈한 기간 (ventilator-free days)을 보았다. 덱사메타손 투여군에서 6.6일, 대조군에서 4.0일로 유의미한 결과를 보였다 (difference 2.26, 95% CI, 0.2 - 4.38,  $P = 0.04$ ). 7일째 SOFA (Sequential Organ Failure Assessment) 점수도 덱사메타손 투여군에서 6.1, 대조군은 7.5 ( $P = 0.004$ )로 스테로이드 투여군이 더 호전되는 소견 보였으나 28일 사망률, 28일 중환자실 퇴실기간, 28일째 기계환기치료 기간 등 다른 지표에서는 두 군간 차이가 없었다. 이차적 감염을 경험한 경우는, 덱사메타손 군의 21.9% (33/151)와 대조군의 29.1% (43/148), 혈당 조절을 위해 인슐린이 필요한 경우는 31.1% *vs.* 28.3% 이었다[121]. CoDEX 연구결과와 함께 발표된 프랑스 연구팀의 CAPE-COVID (The Community-Acquired Pneumonia: Evaluation of Corticosteroids in Coronavirus Disease) 연구를 보면, 중환자실에서 치료받는 중증 코로나 19 감염환자를 대상으로, 하이드로코티손을 7일간 200 mg/d 정주 후 4일간 100 mg/d 정주, 그리고 나머지 3일은 50mg/d 정주한 군과 대조군을 1:1 무작위 배정하여 일차 결과지표로 21일 치료실패를 보았다. 21일 시점에서 저용량 하이드로코티손 투여군이 대조군에 비해 코로나 19 치료 실패율을 낮추지 않았다 (42.1% [32/76] *vs.* 50.7%[37/73],  $P = 0.29$ ). 그런데 CAPE-COVID 연구는 덱사메타손의 긍정적 결과 보고 발표 후 조기 중단되었기 때문에 등



록 예정된 290명 환자를 채우지 못하고 149명에서 멈춰 통계적 검정력이 부족한 (statistically underpowered) 연구일 가능성이 있으나 두 군간 통계적 유의미성은 없었지만 하이드로코티손군에서 낮아진 사망률은 텍사메타손군 연구와 일관된다[122]. REMAP-CAP (Randomized, Embedded, Multifactorial Adaptive Platform Trial for Community-Acquired Pneumonia) 연구에서는 하이드로코티손 7일간 200mg/d 투여군과 (2명은 400mg/d 투여됨), 쇼크가 동반되어 하이드로코티손 200 mg/d 투여군(쇼크에서 회복되거나 혈압상승제를 24시간 중단했을 때 투여중단), 그리고 대조군과 1:1:1 무작위 배정하였다. 일차 결과지표인 21일내 장기 부전으로 인한 치료에서 이탈하는 기간은 대조군에 비해 하이드로코티손 7일 투여군에서 93%, 쇼크 동반 하이드로코티손 투여군에서 80%의 우위 (probabilities of superiority)를 보였으나, 연구가 조기 중단되어 확정적인 결론은 아닐 수 있다[123]. 한편, 브라질에서 진행된 코로나 19 감염으로 인해 입원치료를 환자에서 5일간 하루 0.5 mg/kg 2회 투여 하는 고용량 메틸프레드니솔론 투여군과 대조군 1:1 무작위 배정 Metcovid 연구에서는 28일 사망률을 개선시키지 못했으나 60 세 이상 하위집단 분석에서는 대조군에 비해 사망률이 유의미하게 낮았다 (46.6% vs. 61.9%) [124]. 진행중인 무작위배정 임상시험 자료를 포함한 7개의 무작위배정 임상시험으로 이 외에 3 개의 적용된 환자군과 투여된 스테로이드의 종류, 투여 기간에 따라 다양한 관찰연구에서도 스테로이드 투여가 사망률, 중환자실 이송률, 기도삽관 지표에서 호전을 보이는 결과를 보였으나 [125-127], 경증의 폐렴을 동반한 코로나 19 환자 후향적 코호트 연구에서는 3-5일 정도의 단기간 저용량 스테로이드 투여가 임상적 악화와 관계 있다는 보고도 있었다[128].

진행중인 무작위배정 임상시험 자료를 포함한 7개의 무작위배정 임상시험으로 WHO RE-ACT (Rapid Evidence Appraisal for COVID-19 Therapies) 에서 발표한 코로나 19 중증 환자 1703 명을 대상으로 한 메타 분석에 따르면, 스테로이드 투여군이 대조군에 비해 28일 사망률이 더 낮음을 보고하였다[129].

## ○ 권고 고려사항

### 1. 근거수준

스테로이드의 효과에 대한 RCT와 관찰연구, 메타 분석 모두를 고려할 때 주요 임상지표인 사망률에 개선을 보이는 연구가 다수 포함되어 있으나 스테로이드의 용량과 투여 기간, 환자의 중증도에 따라 결과가 달라졌다. 본 핵심 질문에 대한 종합 근거 수준은 비일관성에서 1등급 낮추어 ‘중등도’ (moderate)로 평가하였다.

### 2. 이득과 위해

산소치로나 기계환기치료를 받는 중증 코로나 19 환자에서 스테로이드 치료는 사망률을 개선시키는 이득이 있다. 비록 이전 다른 연구에서 스테로이드 투여가 무혈성 괴사, 당뇨, 바이러스 제거 지연, 고혈당, 고나트륨혈증, 저칼륨혈증 등의 빈도가를 올리는 위험이 있다고 보고하고 있으나[84, 130, 131] 근거 수준이 낮고 코로나 19 환자연구에서 보고된 사망률의 개선 결과를 볼 때, 스테로이드 사용이 잠재적인 위해보다 이득이 크다고 본다.

### 3. 환자의 가치와 선호도

코로나 19 환자 대상으로 치료 약제 선택에 대한 가치와 선호도를 조사한 연구는 없다. 그런데 이전에도 중증 패혈증, 급성호흡곤란증후군 등에서 스테로이드 투여 경험은 어느정도 알려져 있어 선호도는 낮지 않을 것으로 예상된다.



#### 4. 자원(비용 포함)

스테로이드 사용은 승인 되어있고 가격도 다른 치료에 비해 적은 편으로 비용 부담은 적을 것으로 예상된다.

#### 5. 국내 수용성과 적용성(Acceptability and Applicability)

##### 1) 다른 국가 임상진료지침과의 권고 비교

WHO와 IDSA 가이드라인에서는 중증환자 또는 치명적인 중환자에게 전신 스테로이드 사용을 추천하고 있으며 심각하지 않은 코로나 19 환자에 대해서는 스테로이드 사용을 제안하지 않고 있음. 호주 가이드라인에서는 기계환기치료를 포함한 산소치료를 받는 코로나 19 환자에서 덱사메타손 (또는 수용가능한 대체 스테로이드 제제) 6 mg 정주 또는 경구 투여를 10일까지 권고하고 있음. NIH 가이드라인에서도 덱사메타손 또는 다른 스테로이드 사용을 권고하고 있음.

##### 2) 국내 수용성과 적용성 평가

한국보건 의료 연구원 임상진료지침 핸드북(2015)에서 개발된 국내 수용성과 적용성 평가도구를 활용하여 이들 5개 진료 지침에 대한 국내 수용성 및 적용성 평가를 수행하였다.

#### 6. 기타 고려사항

없음

#### CQ6 인터루킨-6(Interleukin-6) 억제제 (토실리주맙, 살리루맙 등)

##### ○ 문장형 임상질문

코로나 19 환자에게 토실리주맙, 살리루맙 등 인터루킨-6 (Interleukin-6) 억제제의 투여가 표준치료에 비하여 치료효과 및 안전성이 있는가?

##### ○ PICO 요소

| P               | I                 | C    | O                                                                                                            |
|-----------------|-------------------|------|--------------------------------------------------------------------------------------------------------------|
| 코로나 19<br>입원 환자 | · 토실리주맙<br>· 살리루맙 | 표준치료 | · 사망<br>· 임상적 호전<br>· 기계환기 치료<br>· 기계환기 치료 기간<br>· 중환자실 치료<br>· 중환자실 재실 기간<br>· 중증 경과(산소 투여, HFNC, MV, ECMO) |

무작위배정 임상시험, 비교군이 있는 관찰연구로 대상 환자가 500명 이상인 연구

##### ○ 권고문

- 6-1. 코로나19 중증 이상 환자에게 인터루킨-6 억제제는 임상시험 범위 내에서 사용할 수 있다. (근거수준: Moderate, 권고등급 B)
- 6-2. 코로나19 경증 환자에서는 인터루킨-6 억제제 투여를 권고하지 않는다. (근거수준: Low, 권고등급: C)

##### ○ 인터루킨-6(Interleukin-6) 억제제에 대한 기본 정보

염증과다증후군(hyper-inflammatory syndrome) 혹은 사이토카인 폭풍 증후군(cytokine storm syndrome)은 감염질환, 염증성 면역 질환 또는 악성 질환 치료의 심각한 합병증이다. 이는 사이토카인의 합성에 대한 조절 장애로 발생되어 선천 및 적응 면역(Th1와 Th17 매개 면역)의 병리적 활성을 일으킨다. 특히, B세포 분화 인자로 알려진 인터루킨-6는, 면역 방어 및 면역 매개



질환에 중요한 전염증성 매개체로, 면역 반응에서 다발성 기능(multiple pleiotropic function)을 매개하며 항염증 효과를 나타낼 수도 있다[132, 133]. 현재 임상적 사용을 위해 사용 가능한 인터루킨-6 억제제는 항-인터루킨-6 수용체 단클론항체 토실리주맙, 살리루맙, 사트라리주맙과 항-인터루킨-6 단클론항체 실투시맙의 4가지 약리학적 억제제(차단제)가 있다.

토실리주맙은 항인터루킨-6 수용체에 대한 인간화된 immunoglobulin G subclass 1 (IgG1) 단클론항체로서 세포막 결합형 혹은 유리형 인터루킨-6 수용체와 결합하여 인터루킨-6의 염증 발현 작용을 억제한다. 살리루맙도 인간 재조합 IgG1 단클론항체로, 토실리주맙과 같이, 사이토카인이 수용체에 결합하는 것을 억제하고 사이토카인의 효과를 방해한다. 실투시맙은 인터루킨-6을 직접 억제하는 키메라 항 인터루킨-6 단일클론항체이며, 사트라리주맙은 인터루킨-6 수용체와 결합하여 인터루킨-6 신호 전달 경로에 의해 매개되는 염증을 억제하는 인간화 단일클론항체이다.

현저하게 상승된 염증 지표(C-반응 단백, 페리틴, D-이량체) 및 염증 촉진 사이토카인(IL-6)은 중증 코로나-19와 관련이 있고, 염증 경로에 대한 조절이 질병의 악화를 줄이는데 도움이 된다는 가설이 있다[134-138]. 인터루킨-6 억제제는 아직 코로나-19 치료제로 승인 받지 못했으며, 인터루킨-6 작용 경로와 관련된 약제들에 대한 코로나-19 치료 효과와 안전성에 관한 연구들이 진행되어 오고 있다.

#### ○ 근거 요약 (Evidence review)

IL-6 억제제 사용에 대한 권고를 포함한 가이드라인은 3개 가이드라인이 최종 선택되었다 상기 가이드라인에 포함된 연구는 총 10편이었고, 추가 검색을 통해 확인한 연구는 총 6편이었다. 최종 근거표에 포함된 연구는 총 16편으로 무작위배정 임상 시험 6 편, (후향적 혹은 전향적) 코호트 연구 6 편, 환자/대조군 연구 2 편, 환자 사례 연구 2 편이었다.

Gupta 등의 연구에 따르면, 중환자실에 입원한 코로나-19 환자 4,485명을 포함하는 다기관 코호트 연구는 입원 2일 이내에 토실리주맙을 피하 혹은 정맥을 통해 투약한 군이 투약하지 않은 군에 비해 낮은 사망률을 보였다[125/433(28.9%) vs. 1419/3491 (40.6%), 비교정 누적위험비, 0.64; 95% CI, 0.54 - 0.77] [139]. 이와 유사하게 한 전향적 다기관 연구에서 중증 코로나-19 환자에서 입원 6일 이내에 토실리주맙을 투약하면 생존률을 유의하게 생존시킨다는 결과를 확인하였다(누적위험비, 2.2; 95% CI, 1.3 - 6.7;  $P < 0.05$ ) [140]. Rosi 등의 후향적 코호트 연구에서는 하이드록시클로로퀸 혹은 로피나비르/리토나비르를 투약받은 코로나-19 호흡 부전 환자들에서 초기(병원 입원 2일 이내)에 토실리주맙(400 mg 정맥 혹은 324 mg 피하)을 추가로 투약하였을 때, 사망률을 유의하게 줄인 결과를 보고하였고[(34/68 (50%) vs. 7/90 (7.7%); 다변량누적위험비, 0.057; 95% CI, 0.017 - 0.187;  $P < 0.001$ ), 토실리주맙에 의한 부작용은 보고되지 않았다 [141]. 이들은 코로나-19 중증 환자에서 토실리주맙의 조기 투약이 치료 결과 향상에 기여한다는 결과를 제시하였으나, 치료 결과에 주는 혼란 변수를 제어하지 못한 제한점이 있었다. 한편, 단일기관 후향적 연구를 통해, 중증 코로나-19 환자에서 토실리주맙의 투약이 사망률이나 임상적 호전에 유의하게 기여하지 못한다는 보고들도 있다[142, 143].

Guaraldi 등이 이탈리아의 3차 의료기관에서 중증 코로나-19로 입원한 환자 544명(토실리주맙 투약군: 179명)을 대상으로 분석한 연구에 따르면, 다변량 분석을 통해 토실리주맙 투약



이 침습적 인공 호흡기 적용이나 사망을 유의하게 감소하는 것을 확인하였다(누적위험비, 0.61; 95% CI, 0.40 - 0.92) [144]. Rodriguez-Bano 등의 다기관 코호트 연구 역시 회귀 분석을 통해, 토실리주맙을 투약한 환자군에서 대조군에 비해 치료 21일째 사망률을 유의하게 줄였다고 보고하였다(오즈비, 0.07; 95% CI, 0.02 - 0.17;  $P < 0.001$ ) [145]. 다른 다기관 관찰 연구에서도 성향 점수매칭(propensity score matching) 분석을 시행한 결과 중증 코로나-19 환자에서 토실리주맙 투약이 사망률을 유의하게 감소시킨다는 보고가 있었다(누적위험비, 0.64; 95% CI 0.47 - 0.87;  $P = 0.004$ ) [146]. 성향점수매칭(propensity score matching) 분석을 시행한 단일 기관 후향적 코호트 연구에서도 중등도 이상의 코로나-19 환자들에게 토실리주맙의 투약한 환자에서 투약하지 않은 환자들에 비해, 기관 삽관이나 사망의 발생을 줄일 수 있었다(누적 위험비, 0.40; 95% CI, 0.20 - 0.77) [147]. 또 다른 단일 기관 후향적 코호트 연구 역시, 중증 코로나-19 폐렴 환자를 대상으로 토실리주맙을 투약하면, 회귀분석을 이용해 침습적 인공 호흡기 치료 혹은 사망의 발생을 유의하게 줄일 수 있다고 보고하였다(교정 누적위험비, 0.61; 95% CI, 0.40 - 0.92;  $P = 0.020$ ) [144].

반면에 5개의 무작위 시험에서는 토실리주맙을 투약한 환자에서 투약하지 않은 환자에 비해 사망률을 유의하게 줄이는 연구 결과를 찾지 못했다. Stone 등에 의해 시행된 무작위 이중맹검 위약대조군 시험에서는 중증 코로나-19 환자 243명을 포함하였다. 이들은 기관 삽관을 하지 않았지만 전염증 상태의 근거(C-반응 단백, 페리틴, D-이량체 또는 젖산탈수소효소의 증가)가 있는 환자들이었다. 위약군에 비해, 토실리주맙을 단회 투여한 환자들에서 치료 28일째 기관 삽관 또는 사망률의 유의한 감소를 확인하지 못했다(17/161 (10.6%) *vs.* 10/80 (12.5%); 누적위험비, 0.83; 95% CI, 0.38 - 1.81) [148]. Rosas 등의 글로벌 다기관 이중맹검 위약대조군 시험(COVACTA 연구)에서는 중증 코로나-19 폐렴 환자 452명을 대상으로 하였다. 치료군(294명)과 대조군(144명) 사이에 치료 28일째 임상적 호전( $P = 0.36$ ) 혹은 사망률( $P = 0.94$ )은 유의한 차이를 보이지 못하였으나, 전체 재원 기간은 치료군에서 8일이 단축되었고(20.0 *vs.* 28.0 일;  $P = 0.037$ ), 중환자실 재원 기간은 5.8일을 단축할 수 있었다(9.8 *vs.* 15.5 일;  $P = 0.045$ ) [149]. 이는 토실리주맙을 생산하는 제약사 로슈에서 발표한 무작위 이중맹검 위약대조군 시험(EMPACTA 연구)에서 토실리주맙의 투약이 코로나-19 환자의 28일 사망률을 유의하게 줄이지 못했다는 결과와 유사하다[150].

Salvarani 등은 영상 검사에서 코로나-19 폐렴이 확인되고  $\text{PaO}_2/\text{FiO}_2 = 200\text{-}300 \text{ mmHg}$  및 발열과 C-반응 단백질이 증가한 환자 126명을 대상으로, 전향적 눈가림 없는 무작위 임상 시험을 시행하였다. 무작위 배정 후 14일 이내에 임상적 악화 여부[17/60 (28.3%) 토실리주맙 그룹 *vs.* 17/63 (27.0%) 표준 치료 그룹; 비율비, 1.05; 95% CI, 0.59 - 1.86;  $P = 0.87$ ]는 두 군 사이에 차이를 보이지 않았다. 무작위 후 14일 이내에 중환자실 입원(10% *vs.* 7.9%; RR, 1.26; 95% CI, 0.41 - 3.91)이나 30일 사망률 역시 (3.3% *vs.* 1.6%; 비율비, 2.10; 95% CI, 0.20 - 22.6) 두 군간의 유의한 차이를 보이지 않았다. 치료 약물을 중단하는 중증 부작용은 토실리주맙에서 위장관출혈로 한 명이 발생한 반면, 표준 치료 그룹에서는 두 명이 발생하였다 [151]. Hermine 등도 다기관 눈가림 없는 무작위 임상 시험을 통해, 중환자실에 입원하였으나 인공 호흡기 치료는 받지 않고 적어도 3 L/min의 산소 치료가 요구되는 중증 코로나-19 환자 131명을 대상으로 연구를 진행하였다. 표준 치료군과 비교할 때, 토실리주맙 치료가 28일 사망률을 줄이지 못하였으나(7/64 (10.9%) 토실리주맙 그룹 *vs.* 8/67 (11.9%) 표준 치료 그룹; 누적위험비, 0.92; 95% CI, 0.33 - 2.53), 치료 14일째 비침습적이나 침습적 인공 호흡기 치료 혹은 사망 발생은 유



의하게 감소시켰으며(24% 토실리주맙 그룹 *vs.* 36% 표준 치료 그룹; 누적위험비, 0.58; 90% consistent credible intervals, 0.33 - 1.00), 두 군 사이에 중증 부작용의 빈도는 유의한 차이를 보이지 않았다(32% 토실리주맙 그룹 *vs.* 43% 표준 치료 그룹;  $P=0.21$ ) [152]. 이러한 무작위 시험 결과는 관찰 연구 결과와 다른 결과를 보여주어, 관찰 연구에서 확인되지 않은 혼란 변수의 영향을 고려해야 한다. Wang 등의 다기관 눈가림 없는 무작위 임상 시험에서는 중등도 이상의 코로나-19 환자 65명을 대상으로 33명의 환자에 대해 치료 첫 날 토실리주맙 400 mg를 정맥으로 투약한 후 24시간 이내에 발열이 확인되면 두 번째 투약을 한 결과, 대조군에 비해, 치료율은 향상되지 않았으나(94.12% 토실리주맙 그룹 *vs.* 87.10%;  $P=0.41$ ), 저산소증의 악화는 토실리주맙 치료군에서 유의하게 감소하는 것을 확인하였다( $P=0.021$ ). 토실리주맙을 투약 받은 환자에서 심각한 부작용은 발생하지 않았으나, 부작용의 발생 빈도는 토실리주맙 그룹이 59% (20.34)였던 반면 대조군은 13% (4/31)로 확인되었다. 가장 흔한 부작용은 간기능 이상(18%), 백혈구 감소(15%), 호중구 감소(9%)이었으며, 모두 보존적 치료 후 호전되었다 [153].

Martinez-Sanz 등의 다기관 코호트 관찰 연구는 코로나-19 입원 환자를 대상으로 진행되었는데, 토실리주맙의 치료 효과를 극대화할 수 있는 대상 환자를 선정하는데 도움을 주었다. 치료 시작 시점에서 C-반응 단백 > 150 mg/L의 환자들에서, 사망(교정 누적위험비, 0.34; 95% CI, 0.17 - 0.71;  $P=0.005$ ) 및 중환자실 치료 혹은 사망(교정 누적위험비, 1.77; 95% CI, 1.41 - 2.22;  $P<0.001$ )의 발생을 유의하게 줄였다. 반면에, C-반응 단백  $\leq 150$  mg/L 환자에서는 치료 효과를 확인할 수 없었다 [154].

최근 발표된 6개의 체계적 문헌 고찰 및 메타분석 연구들에서도 중증 코로나-19 환자에서 토실리주맙의 투약이 사망률 감소에 미치는 영향은 일치된 결과를 보이지 않는다. 4개의 연구는 토실리주맙 치료가 사망률을 유의하게 감소시킨다고 보고하였으나 [155-158], 다른 2개의 연구는 상반된 결과를 보고하였다 [159, 160].

코로나-19 환자에 대한 사리루맙의 치료 효과에 관한 연구는 매우 제한적으로 하나의 단일 기관 사례 일련연구를 통해, 사리루맙을 투약 받은 15명 코로나-19 환자 중 10명에서 증상의 호전이 확인되었고, 빠른 C-반응 단백질의 감소는 임상적 호전과 연관성을 보였다[161].

## ○ 권고 고려사항

### 1. 근거수준

토실리주맙의 효과에 대한 연구들은 주로 중증 환자들을 대상으로 진행되었으나 중증의 기준이 다양하였고, 표준 치료군에 포함된 환자들은 다양한 약제를 투약 받았을 뿐 아니라, 무작위 배정 임상 시험 중 이중 맹검이 적용된 연구는 하나에 불과하였으며 참여 환자 수마저 적은 제한점이 있었다. 환자-대조군 연구 중 두 군 사이에 나이, 기저질환, 염증 지표의 차이 및 임상적 중증도의 불균형을 보이는 경우가 흔하였고, 토실리주맙을 투여받은 군에서조차 다양한 약제가 동시에 투여되어 토실리주맙의 단독 효과를 평가하기 어려웠다. 또한, 임상적 인공 호흡기 적용 여부 등을 임상적 호전 척도로 사용한 연구들은 의료진의 주관적 판단을 근거로 인공 호흡기 적용 여부가 결정되는 등 임상적 호전 여부 판단에 대한 편향성에 대한 우려가 있었다.



아직, 코로나-19 환자를 대상으로 토실리주맙을 투약할 때, 가장 효과적인 투여 용량과 경로가 명확하지 않고, 투약 시점에 따른 치료 효과의 차이가 규명되어야 한다. 특히, 토실리주맙의 치료 효과를 극대화하기 위한 대상 환자군이 결정되어야 한다.

하지만, 사망 발생 건수에 비해 전체 대상 환자 수가 적어 통계적 유의성을 보이기 어려운 측면과, 일부 연구에서 치료군과 대조군에 대한 혼란 변수를 보정하기 위한 통계 기법들이 적용되었던 부분, 그리고 무작위 배정 임상 시험 연구 결과들을 고려하여 종합 근거 수준을 ‘중등도(moderate)’로 평가하였다.

## 2. 이득과 위해

무작위 배정 임상 시험과 코호트 연구 결과들은 토실리주맙의 사용이 코로나-19 환자들의 치료 결과를 향상시킨다는 근거가 일관되지 않았으나, 일부 연구를 통해 사망률을 개선시키거나 인공 호흡기 사용이나 중환자실 치료의 빈도를 줄이는 반면 중증 부작용의 빈도가 높지 않다는 보고가 있다. 따라서, 치료 효과를 극대화할 수 있는 대상 환자군을 규명하고, 치료제 투약과 관련된 용량과 용법을 정형화하기 위한, 대규모 이중 맹검 무작위 임상 시험이 요구된다.

대부분의 연구에서 토실리주맙 치료군의 중증 부작용 발생 빈도는 대조군과 유의한 차이가 없었다. 토실리주맙과 관련된 부작용들은 일반적으로 비인두염, 두통, 상부호흡기감염증, 위염, 발진, 관절통, 근육통, 피로감 및 구역, 피부 및 연조직 감염 등이 보고되고 있다. 가장 흔한 심각한 부작용으로 위장관 천공이 발생할 수 있다. 혈액 검사에서 확인되는 이상 소견은 호중구 감소증, 혈소판 감소증, 이상 지질 혈증 및 간효소 상승이 있다. 류마티스관절염 환자에서 토실리주맙 치료가 악성 및 자가면역 질환이나 결핵의 재활성화 혹은 감염이 유의하게 증가한다는 명확한 근거는 없다[162]. 하지만, Guaraldi G 등은 후향적 관찰 코호트 연구를 통해, 토실리주맙을 투약 받은 환자에서 투약 받지 않은 환자보다 새로운 감염이 유의하게 증가하였다고 보고한 반면[24/179 (13%) vs. 14/365 (4%),  $P < 0.0001$ ], 다른 연구들에서는 감염의 증가가 확인되지 않았다[144, 148, 151, 152].

## 3. 환자의 가치와 선호도

환자의 가치와 선호도에 관한 정형화된 연구 결과는 없지만, 류마티스관절염이나 소아특발성관절염 치료제로 승인된 인터루킨-6 억제제는 코로나-19 환자에 대해서는 미국 식약처 승인 없이 처방되고 있는 상황으로 급여 대상 약제가 아니며 해당 약제들을 생산하는 로슈와 사노피/리제네론도 등의 제약사 주도 임상 연구에서 인터루킨-6 억제제가 코로나-19의 증상 개선이나 치사율을 줄이지 못한다는 발표 내용, 그리고 외국의 진료 지침에서 대부분 코로나-19 환자에서 사용을 권고하지 않는 것을 볼 때 선호도는 낮을 것으로 예상된다.

## 4. 자원(비용 포함)

인터루킨-6 억제제인 악템라(토실리주맙) 및 케브자라(살리루맙)는 2012년도에 국내에서 류마티스관절염과 소아특발성관절염에 승인되어 현재 사용 중인 약제로 치료제에 대한 접근성은 높지 않다. 하지만, 코로나-19에 대한 인터루킨-6 억제제 사용에 대한 비용-효과 분석에 관한 연구 결과는 없다. 코로나-19 환자에서는 임상 시험의 목적으로만 사용이 가능하기 때문에 급여 대상 약물에서 제외되어 있으므로 비용 부담이 상대적으로 크다. 일부 환자들은

임상 시험 대상으로 선정이 어려울 수 있고, 개인이 치료제에 대한 비용을 부담해야 하기 때문에 치료제에 대한 접근과 관련된 불평등이 발생할 수 있다.

## 5. 국내 수용성과 적용성(Acceptability and Applicability)

### 1) 다른 국가 임상진료지침과의 권고 비교

ACPG와 NIH 지침에서는 적절한 기관생명윤리위원회 승인을 얻은 무작위 임상 시험 이외의 경우 코로나-19 치료를 위해 토실리주맙을 사용하지 않을 것을 권유하고 있다. IDSA 지침 역시 코로나-19로 입원한 환자에서 토실리주맙의 일상적인 사용에 반대하였다.

### 2) 국내 수용성과 적용성 평가

역동적으로 변화하고 있는 코로나-19 범유행의 역학 상황 및 의료 자원의 상황은 해당 권고의 수용성에 영향을 줄 것으로 예상된다. ACPG, IDSA, NIH 진료 지침과 비교할 때, 해당 권고와 관련하여 인구 집단의 특성이나 환자들의 가치와 선호도에 따른 유의한 차이를 찾기 어렵다. 전반적으로 높은 수용성을 기대할 수 있으나, 개인차가 클 것으로 예상되며, 권고로 인한 이득은 다른 지침들과 유사할 것으로 사료된다.

인터루킨-6 억제제는 자가면역질환에서 승인 받은 전문 의약품으로 이미 국내 임상 현장에서 유통되어 사용 중에 있으나, 코로나-19에 대한 치료제로는 승인 받지 못한 약이기 때문에 반드시 적절한 기관생명윤리위원회 승인을 통해 사용해야 한다. 해당 사실이 법률적 혹은 제도적 장벽을 높일 것으로 사료되지 않아 권고를 적용하는 것은 가능할 것으로 판단된다.

## 6. 기타 고려사항

없음

## CQ7 인터루킨-1(Interleukin-1) 억제제 (아나킨라)

### ○ 문장형 임상질문

코로나 19 환자에게 인터루킨-1 억제제 투여가 도움이 되는가?

### ○ PICO 요소

| P         | I          | C               | O                                                                                                                                                        | 비고                       |
|-----------|------------|-----------------|----------------------------------------------------------------------------------------------------------------------------------------------------------|--------------------------|
| 코로나 19 환자 | 인터루킨-1 억제제 | 표준치료 또는 무처치 대조군 | <ul style="list-style-type: none"> <li>· 사망</li> <li>· 중증 경과(산소 투여, HFNC, MV, ECMO)</li> <li>· 중환자실 치료</li> <li>· 중환자실 재실 기간</li> <li>· 입원 기간</li> </ul> | 무작위배정 임상시험, 비교군이 있는 관찰연구 |

### ○ 권고문

코로나19 환자에게 인터루킨-1 억제제 투여에 대한 근거가 불충분하여 권고를 보류한다. (근거수준: 낮음, 권고 등급: I).

### ○ 인터루킨-1 억제제 관련 기본 정보

심한 코로나 19 환자에서 인터루킨-1(interleukin-1, IL-1)등의 사이토카인 분비가 증가하는 것으로 알려져있다[163]. 인터루킨-1 억제제 (예, 아나킨라)는 류마티스 관절염, cryopyn-associated periodic syndrome(특히, 신생아기에 발생하는 다기관 염증 증후군)등에 허가를 받은 약



이다. 또한, 키메라 항원 수용체 T 세포(chimeric antigen receptor T cell, CAR T-cell)에 의한 심한 사이토카인 분비 증후군(cytokine release syndrome, CRS), 대식세포활성화 증후군(macrophage activation syndrome, MAS)/이차성 혈구탐식성림프조직구증식증(hemophagocytic lymphohistiocytosis, HLH)의 치료에 시도된 바 있다. 코로나 19 환자에서 과도한 사이토카인 분비에 의한 심한 염증반응이 있는 중한 경과를 보이는 경우에 아나킨라의 사용이 사이토카인 폭풍을 가라앉히고 회복에 도움을 준 보고가 있었다.

#### ○ 근거 요약 (Evidence summary)

코로나19 환자에서 인터루킨-1 억제제로 치료한 군과 무처리 대조군의 자료를 비교한 무작위 임상시험 자료는 없다. 아래의 인터루킨-1 억제제 연구는 모두 아나킨라를 사용하였다.

- 2020년 3월, 이탈리아에서, 18세 이상, 중등도 및 심한 호흡부전증후군(acute respiratory distress syndrome, ARDS)가 있고, 과염증 상태이며, 중환자실 외에서 비침습적 환기 치료를 받는 코로나19 환자 대상으로 후향적 코호트 연구를 시행하였다[164]. 아나킨라를 5 mg/kg 용량으로 하루에 두번씩(고용량) 정맥 주사한 군의(29명) 자료를 대조군의(16명) 자료와 비교하였다. 21일째 환자의 경과는 아나킨라 치료군에서 72%의 환자가 C-반응 단백질 감소, 호흡 기능 호전이 있었고, 기계적 환기 필요 17%, 사망 6%였다. 대조군에서는 50%의 호전이 관찰되었고, 기계적 환기가 필요 6%였고, 사망 44%였다. 균혈증은 아나킨라 군 14%, 대조군 13%에서 발생하였다.

- 2020년 3월-4월 사이에 프랑스에서 시행된 연구에서 18세 이상의 성인으로서 양측 폐렴이 있는 심한 코로나 19가 확진된 환자들에 대한 자료를 분석하였다[165]. 본 연구에서는 과거 대조군 코호트 환자의 자료를 아나킨라 치료를 한 환자에서 전향적으로 모은 자료와 비교하여 분석하였다. 아나킨라 군의 환자들은 아나킨라 100 mg을 하루에 두번씩 피하주사로 72시간 투여 받은 후, 100 mg 하루에 한번씩 7일 동안 투여 받았다. 아나킨라 군은 55명이었고, 44명의 과거 대조군은 44명이었다. 아나킨라 군에서는 기계적 환기를 위한 중환자실 입실 및 사망이 25%의 환자에서 발생하였고, 과거대조군에서는 73%에서 발생하였다(누적 위험비 0.22 [95% CI 0.11 – 0.41];  $P < 0.0001$ ). 다변량분석에서도 통계적 유의성은 지속적으로 관찰되었다(누적 위험비 0.22 [95% CI 0.10 – 0.49];  $P = 0.0002$ ). 간수치 상승은 anakinra 군에서 13%, 과거대조군에서는 9%로 관찰되었다.

- 2020년 3월-4월 사이에 미국 캘리포니아 지역에서 치료받은 코로나19 환자를 대상으로 한 후향적 코호트 연구에서는 인터루킨-1 억제제인 토실리주맙과 아나킨라 치료를 받은 환자를 비교하였다[166]. 전기에 토실리주맙 치료를 받은 환자는 52명, 후기에 아나킨라 치료를 받은 환자는 41명이었다. 아나킨라 100 mg 하루에 4번 피하주사를 받은 군이 토실리주맙 치료 군에 비해 사망률이 낮았다(22% vs. 46%). 그러나, 치료 시작 당시의 질병의 중증도의 차이를 보정한 후에는 이러한 차이가 더 이상 통계적으로 유의하지 않았다(성향 점수 교정 누적위험비 0.46, 95% CI 0.18 – 1.20).

- 프랑스의 연구진은 코로나19 확진자들에게 아나킨라 300 mg 하루에 한번 정맥 주사로 5일 동안 투여, 추가 2일 동안은 200 mg 하루에 한번, 마지막날에는 100 mg 한번의 요법으로 치료한 자료를 후향적으로 분석하였다[167]. 아나킨라 군은 12명 대조군은 10명이었다. 아나



킨라 치료를 받은 환자들은 대조군에 비하여 통계적으로 유의한 임상적 호전을 보였고(산소 요구도, 기계적 환기가 필요하지 않은 날짜 수) 사망자도 없었다. 대조군에서 사망자가 1명 있었다.

- 미국의 연구자들은 2020년 3월-4월 사이에 미국 동부의 12개 병원에서 코로나19로 치료받은 환자 5,776명의 전자의무기록을 후향적으로 검토하였다[168]. 코로나19에 의한 사이토카인 폭풍을 치료하기 위하여 면역조절제 투여를 받은 환자들의 생존 자료를 비교하였다. 표준 치료군에 비하여 스테로이드 단독(누적 위험비 0.66 [95% CI, 0.57 - 0.76];  $P < 0.0001$ ), 스테로이드-토실리주맙 병합 요법(누적 위험비 0.44 [95% CI, 0.35 - 0.55];  $P < 0.0001$ ), 스테로이드-아나킨라 병합요법(누적 위험비 0.68 [95% CI, 0.57 - 0.81];  $P < 0.0001$ ) 치료군의 환자들의 사망률이 낮았다. 그러나, 토실리주맙 단독, 아나킨라 단독 요법 치료를 받은 환자들의 사망률은 표준 치료군 사망률과 차이가 없었다.

#### ○ 권고 고려사항

##### 1. 근거 수준

코로나19 환자에서 인터루킨-1 억제제 치료에 대한 무작위대조 연구는 없으며 후향적 코호트 연구 자료만 있다. 또한, 연구에 따라 인터루킨-1 억제제인 아나킨라의 용량 용법 치료 기간 등이 다양하다. 아나킨라 치료군에서 대조군에 비하여 회복, 기계환기 요구도, 사망률 등에 대한 긍정적이 자료를 보고한 논문도 있지만, 치료 시작 당시의 중증도를 고려하면 통계적 유의성이 없어짐을 보고한 연구도 있었다. 또한, 아나킨라 치료 군이라 하여도 스테로이드와의 병합 요법을 받은 환자가 많아 해석에 어려움이 있다. 가장 많은 환자수를 분석한 미국 동부의 연구에서 아나킨라 단독 요법은 스테로이드 단독요법이나 스테로이드-아나킨라 병합요법에 비하여 생존의 우위를 보여주지 못하였다. 그러므로 현재까지의 자료로는 인터루킨-1 억제제 아나킨라의 효과에 대한 종합 근거수준은 ‘낮음(Low)’으로 평가하였다.

##### 2. 이득과 이해

중증 코로나 19 환자에서 아나킨라의 사용은 과도한 염증 반응을 줄일 것이 예상되는 약물이다. 그러나, 스테로이드에 비하여 세균, 진균 감염이나 추가 합병증의 발생이 높지 않고, 임상적 회복에 우월한 효과가 증명되어야 할 것으로 사료된다.

##### 3. 환자의 가치와 선호도

코로나 19 환자 대상으로 치료 약제 선택에 대한 가치와 선호도를 조사한 연구는 없다. 코로나19 환자에서 급격한 악화 시 사이토카인 폭풍에 대한 정보가 일반인들에게도 많이 알려져 위중한 환자에서 이에 대한 선호도는 낮지 않을 것으로 예상된다.

##### 4. 자원 (비용 포함)

본 약제는 1병에 100 mg/0.67mL 이며 일반 약가는 76,392원이다. 반면 스테로이드의 약가는 아나킨라에 비하여 약가 부담이 적인 편으로서, 아나킨라의 사용은 비용적 고려가 필요하다.

##### 5. 국내 수용성과 적용성(Acceptability and Applicability)

###### 1) 다른 국가 임상진료지침과의 권고 비교

타 국가 지침에서도 사용을 권고하고 있는 국가는 없다.

## 2) 국내 수용성과 적용성 평가

한국보건 의료 연구원 임상진료지침 핸드북(2015)에서 개발된 국내 수용성과 적용성 평가도구를 활용하여 이들 5개 진료 지침에 대한 국내 수용성 및 적용성 평가를 수행하였다.

## 6. 기타 고려사항

용량 용법 정해진 기준이 없다. 스테로이드 치료 불응 혹은 합병증 환자에서 인터루킨-1 억제제의 추가 사용에 대한 체계적인 자료가 필요하다.

## CQ8 기타 면역조절제 (인터페론, interferon)

### ○ 문장형 임상질문

코로나 19 환자에게 인터페론 투여가 표준치료 또는 무처치 대조군에 비하여 치료 효과 및 안전성이 있는가?

### ○ PICO 요소

| P               | I      | C                  | O                                                     | 비고                          |
|-----------------|--------|--------------------|-------------------------------------------------------|-----------------------------|
| 코로나 19<br>입원 환자 | · 인터페론 | 표준치료 또는<br>무처치 대조군 | · 사망<br>· 기계환기<br>· 입원기간<br>· 퇴원<br>· WHO 임상 증상 순위 척도 | 무작위배정 임상시험, 비교군이 있는<br>관찰연구 |

### ○ 권고문

코로나19 환자에게 인터페론은 임상 시험 범위 내에서 사용할 수 있다. (근거수준: '낮음'. 권고등급: B)

### ○ 기타 항바이러스 관련 기본 정보

인터페론은 항바이러스 특성을 보이는 면역 조절 물질로 과거 중증 SARS-CoV1 및 MERS-CoV 환자에서 치료제로 사용되었다. 인터페론은 SARS-CoV-2 세포 실험에서 바이러스 증식을 억제하는 것으로 확인되었다[169]. 또한 중증 코로나19 환자에서는 1형 인터페론 분비가 감소된 것으로 알려져 있으며 인터페론 분비를 증가시키는 자가 항체는 중증 코로나19 진행과 관련된 위험 요인으로 보고되었다[170, 171].

### ○ 근거 요약 (Evidence summary)

인터페론에 대한 권고를 포함한 3개 가이드라인이 최종 선택되었다. 상기 가이드라인이 포함한 연구는 총 4편이었고, 추가 검색을 통해 확인한 연구는 총 2편이었다. 최종 근거표에 포함된 연구는 총 6편으로 무작위배정 임상시험 (randomized controlled trial, RCT) 4편, 관찰연구 2편 이었다. 종합된 근거 합성 결과는 다음과 같다.

코로나 19 환자를 대상으로 한 인터페론 연구는 대부분 인터페론과 로피나비르/리토나비르를 병합한 치료와 로피나비르/리토나비르 표준 요법과의 효과를 비교하였다. 4건의 무작위 배정 임상시험 중 가장 대규모의 연구는 WHO 주도로 30개국에서 시행된 SOLIDARITY 연구이다. 인터페론 β-1a은 SOLIDARITY 연구에서 시행된 4가지 약물 중 하나로 약 4100명의 코로나-19 입원한 환자를 대상으로 무작위배정 임상시험이 시행되었다. 표준 요법과 함께 인터페론 β-1a를 6일간 총 3회 피하로 투여 받은 환자군과 표준 요법만으로 치료 받은 환자군을 비



교하였다. 두 군 간의 입원 기간 중 사망비는 1.16 (95% 신뢰구간, 0.96 - 1.39)로 인터페론  $\beta$ -1a 병합치료는 표준치료에 비해 사망률을 감소시키지 못하였다[11]. 이 연구에서 인터페론  $\beta$ -1a는 기계 호흡 치료나 입원 기간 감소에도 효과를 입증하지 못하였다. SOLIDARITY 연구를 제외한 인터페론에 대한 다른 3건의 무작위배정 임상시험은 모두 대상자 100명 이하의 소규모 연구이다. 이 중 흡입용 인터페론  $\beta$ -1a를 사용한 연구는 위약과 비교하였을 때 사용 후 2주째 WHO 임상증상 순위 척도가 개선되는 효과 (오즈비 2.32, 95% 신뢰구간 1.07 - 5.04)가 있었다[172]. 경증 및 중증증의 코로나19 환자에서 인터페론  $\beta$ -1a와 함께 리바비린, 로피나비르/리토나비르를 세가지 약제를 병합한 치료와 로피나비르/리토나비르만을 사용한 연구에서는 인터페론  $\beta$ -1a 및 리바비린을 병합 치료한 환자군에서 바이러스 배출 기간이 단축되는 효과가 있었다[103]. 중증의 코로나 19 환자에서 로피나비르/리토나비르 및 하이드록시클로로퀸을 표준치료로 하여 인터페론  $\beta$ -1a를 병합한 효과를 비교한 연구에서는 인터페론  $\beta$ -1a 병합 치료는 표준 치료보다 14일째 퇴원을 증가와 28일째 사망률 감소에 효과를 보였다[173].

#### ○ 권고 고려사항

##### 1. 근거수준

인터페론 치료 효과에 대해 연구한 무작위배정 임상시험과 관찰 연구 결과는 약제의 병용 투여, 투여 경로 및 시점, 질병의 중증도, 연구 규모에 있어서 연구 결과를 해석하기에 제한이 있다. SOLIDARITY 연구는 4000명 이상의 환자가 포함된 대규모의 무작위배정 임상시험 결과 이기는 하나 스테로이드와 병합 투여 여부, 투여 전 중증도, 주사 혹은 피하 투여와 같은 다양한 교란 변수는 연구 결과 해석의 제한점이다. 현재 피하 주사용 인터페론  $\beta$ -1a를 이용한 다수의 임상 연구가 진행 중이며 인터페론 치료 효과에 대한 추가 연구가 필요하다[174].

##### 2. 이득과 위해

인터페론의 효과에 대해 보고한 가장 대규모의 무작위배정 임상시험인 SOLIDARITY 연구에서 코로나19 환자의 표준치료에 인터페론을 병합하여 사용하는 것은 사망률, 기계호흡 치료 및 입원 기간 감소에 효과를 입증하지 못하였다. 그러나 다른 소규모의 무작위배정 임상시험에서 흡입용 혹은 경피용 인터페론  $\beta$ -1a는 임상 증상의 호전, 퇴원 및 사망 감소에 효과가 있었다. 현재까지의 연구결과를 바탕으로 코로나19 환자의 치료에 인터페론 사용을 권고하기는 어렵다. 임상 시험의 범위내에서 인터페론 사용은 가능하다.

만성간염 치료제로 사용되었던 인터페론  $\alpha$ 의 주요 부작용은 발열, 근육통, 피로감, 혈구감소증 및 우울감, 자살 생각과 같은 신경정신병 문제이다[175]. 인터페론  $\beta$ 는 인터페론  $\alpha$ 보다 부작용은 적은 것으로 알려져 있으며 코로나19 환자에서 인터페론  $\beta$  사용에 의한 부작용의 빈도는 연구마다 차이가 있다[172]. 한 연구에서는 피하용 인터페론을 병합하여 사용한 군에서 표준치료 군에서는 없었던 인터페론 투여와 관련된 발열, 오한, 두통, 피로의 빈도가 19.0%, 불안 등의 신경정신병 문제의 빈도를 9.5%로 보고하였다[173]. 그러나 다른 연구에서는 인터페론 병합치료군과 표준 치료군 간에 부작용 빈도의 차이는 없었다[103]. 한편 흡입용 인터페론을 사용한 연구에서 인터페론 흡입군(15%)은 위약군(4%) 보다 기침과 같은 치료 관련 부작용의 빈도가 많았다[176].

##### 3. 환자의 가치와 선호도

아직까지 코로나19 환자의 치료제의 선택은 매우 제한되어 있으며 치료 효과를 증명한 약제



또한 드물다. 코로나19 유행 초기에 치료제에 대한 정보가 부족한 상황에서 인터페론은 과거 SARS-CoV-1 및 MERS-CoV 환자에서 치료 경험을 바탕으로 코로나19 환자에게 다른 항바이러스제와 병용 투여시 보편이 인정되었으나 현재는 임상 시험의 범위 내에서 주로 사용되고 있다.

#### 4. 자원(비용 포함)

국내에서 사용가능한 경피용 인터페론  $\beta$ -1a는 다발성 경화증 환자에게 치료제로 사용되었던 Rebif<sup>®</sup>가 있다. 흡입용 인터페론  $\beta$ -1a는 바이러스성 하기도감염 환자에게 치료를 목적으로 개발되었으나 아직 국내에서 승인되지 않았다.

#### 5. 국내 수용성과 적용성(Acceptability and Applicability)

##### 1) 다른 국가 임상진료지침과의 권고 비교

WHO, NIH, 호주 등 주요 임상진료지침에서는 임상시험 범위 밖의 코로나19 환자에게는 인터페론을 사용하지 말 것을 권고하고 있다.

##### 2) 국내 수용성과 적용성 평가

한국보건의료연구원 임상진료지침 핸드북(2015)에서 개발된 국내 수용성과 적용성 평가도구를 활용하여 이들 5개 진료 지침에 대한 국내 수용성 및 적용성 평가를 수행하였다.

#### 6. 기타 고려사항

코로나19 환자를 대상으로 인터페론 병합 치료에 대한 여러 임상시험이 국내·외에서 진행되고 있다.

#### CQ9 회복기 혈장 치료(convalescent plasma)

##### ○ 문장형 임상질문

코로나 19 환자에게 회복기 혈장 치료가 표준치료 또는 무치치 대조군에 비하여 치료효과 및 안전성이 있는가?

##### ○ PICO 요소

| P               | I           | C                  | O                                                                                                                     | 비고                          |
|-----------------|-------------|--------------------|-----------------------------------------------------------------------------------------------------------------------|-----------------------------|
| 코로나 19<br>입원 환자 | · 회복기 혈장 치료 | 표준치료 또는<br>무치치 대조군 | · 사망<br>· 기계환기/ECMO 치료<br>· 기계환기/ECMO 치료 기간<br>· 중환자실 치료<br>· 중환자실 재실 기간<br>· 중증 경과(산소 투여, HFNC, MV, ECMO)<br>· 입원 기간 | 무작위배정 임상시험,<br>비교군이 있는 관찰연구 |

##### ○ 권고문

코로나 19 환자에게 회복기 혈장 치료 이득에 대한 충분한 근거가 없어 권고를 보류한다. (근거수준: 낮음, 권고등급: I)

##### ○ 기타 항바이러스 관련 기본 정보

회복기 혈장은 항바이러스 중화 항체를 가지고 있을 수 있으며 항체 의존 세포 독성, 보체 활



성화, 식세포 활동과 같은 면역 반응을 통해 감염성 질환의 치료 옵션 중 하나로 여겨져왔다. 회복기 혈장은 에볼라, 사스, 메르스에서 고무적인 연구 결과를 보였으나 연구 대상이 적고 무작위 연구가 아니라는 한계가 있었다[177-179].

#### ○ 근거 요약 (Evidence summary)

회복기 혈장에 대한 권고를 포함한 가이드라인은 4개 가이드라인이 최종 선택되었다 상기 가이드라인이 포함한 연구는 8편, 추가 검색을 통해 확인한 연구는 총 4편이었다. 최종 근거 표에 포함된 연구는 총 13편으로 무작위배정 임상시험 5편, (후향적 혹은 전향적) 코호트 연구 3편, 환자/대조군 연구 4편, 사례 기술 1편이었다. 총 5편의 무작위배정 임상시험 중 2편이 동료 평가가 이루어지지 않았다.

종합된 근거 합성 결과는 다음과 같다.

Li 등은 회복기 혈청 투여군 (52명)과 투여하지 않은 군 (51명) 비교시 28일째 임상적 호전은 두 군간의 차이가 없었고(누적위험비 1.40; 95% CI, 0.79 - 2.49;  $P=0.26$ ), 사망률도 차이가 없었다(투여군 16% vs. 대조군 24%,  $P=0.3$ ). 이 연구에서는 특이 IgG 역가가 1:640 이상인 혈장을 투여하였고. 증상 발생일부터 연구 참여까지 기간이 혈장 투여군은 약 27일, 대조군은 약 30일로 비교적 길었으며 맹검 연구가 아니라는 한계점이 있다[180]. 회복기 혈장 투여군 (235명)과 투여하지 않은 군 (239명)을 비교한 무작위배정 임상시험에서는 중증으로의 진행 또는 28일째 사망은 투여군에서 19%, 대조군에서 18%가 발생하였다(위험도 차이 0.008 (95% CI -0.062 - 0.078); 위험비 1.04, 95% CI 0.71 - 1.54). 이 연구는 맹검 연구가 아니며 중화 항체 역가를 측정하지 않았다는 한계점이 있다[181].

동료 평가가 이루어지지 않은 두 편의 무작위배정 임상시험이 있었는데, 한 연구에서는 회복기 혈장 투여한 환자 38명중 인공 호흡기들 달거나 사망한 환자가 없었던 반면, 투여하지 않은 43명 중 14%가 임상적 악화를 보였고 29일째 9.3%가 사망하여 회복기 혈장 투여가 효과적이라고 보고하였다[182]. 이 연구 또한 맹검 연구가 아니었다. 또 다른 연구에서는 회복기 혈장 투여군 (43명)과 대조군(43명)에서 질병 악화나 사망률에 유의미한 차이가 없었다[183].

중증의 폐렴 환자에서 2:1로 무작위 배정한 맹검 연구에서는 사망률이 투여군(228명)에서 10.96%, 대조군(105명)에서 11.43%로 크게 다르지 않았다(오즈비, 0.83 (95% CI, 0.52 - 1.35;  $P=0.46$ )[184].

#### ○ 권고 고려사항

##### 1. 근거수준

회복기 혈장 투여 효과에 대해 연구한 무작위배정 임상시험은 소수의 환자를 대상으로 하였으며 대부분 맹검 연구가 아니었으며 항체 역가, 혈장 투여 시점이 각기 연구마다 다르다는 제한점이 있었다. 따라서 비정밀성, 비일관성 측면에서 근거수준을 낮추어 종합 근거수준에서는 ‘낮음(Low)’으로 최종 평가하였다.

##### 2. 이득과 위해

회복기 혈장 투여 효과에 대한 소수의 소규모 환자를 대상으로 한 무작위배정 임상시험 만이



있으며, 한 연구를 제외하고는 회복기 혈장 투여가 코로나 19 환자에서 임상적 호전이나 사망률 감소에 이득이 없었다. 혈장 선택의 기준과 투여 시점 등에 대해서도 연구마다 달라 지금까지의 근거로는 회복기 혈장 투여에 대한 이득을 결론내기는 어렵다.

2,000명을 대상으로 한 안전성 연구에서 수혈과 관련된 부작용은 78건으로 1%미만으로 적다고 보고하였다[185]. 63건 (0.3%)이 사망하였고 이 중 13건이 수혈과 연관 가능성이 있다고 판단하였다.

### 3. 환자의 가치와 선호도

한국에서 코로나 19 환자를 대상으로 치료 약제 선택에 대한 가치와 선호도를 조사한 연구는 없다. 국내에서는 2명의 급성 호흡 부전 코로나 19 폐렴 환자에서 스테로이드와 혈장 치료를 시행하여 예후가 좋았다는 증례 보고가 있다[186].

### 4. 자원(비용 포함)

어떤 환자의 회복기 혈장을 공여자로 선택하느냐에 따라 중화항체의 효과가 다를 수 있어 공여자 선택의 기준이 필요하다.

### 5. 국내 수용성과 적용성(Acceptability and Applicability)

#### 1) 다른 국가 임상진료지침과의 권고 비교

IDSA 가이드라인에서는, 코로나 19로 병원에 입원한 환자 중 임상시험 경우에만 코로나 19 회복기 혈장 치료를 권하며 ACPG에서도 윤리적 승인을 받은 무작위 시험 이외에는 권장하지 않는다. NIH와 중국에서는 회복기 혈장 치료에 대한 근거 자료가 부족하다고 보았다.

#### 2) 국내 수용성과 적용성 평가

한국보건의료연구원 임상진료지침 핸드북(2015)에서 개발된 국내 수용성과 적용성 평가도구를 활용하여 이들 5개 진료 지침에 대한 국내 수용성 및 적용성 평가를 수행하였다.

### 6. 기타 고려사항

회복기 혈장 치료는 코로나 19 환자에서 미국 식약처 사용 승인이 되지 않았다.

### CQ10 일반적인 정맥용 면역글로불린, Conventional IVIG (intravenous immunoglobulin)

#### ○ 문장형 임상질문

코로나 19 환자에게 일반적인 정맥용 면역글로불린 (Conventional IVIG) 투여가 표준치료 또는 무처치 대조군에 비하여 치료효과 및 안전성이 있는가?

#### ○ PICO 요소

| P            | I               | C               | O                                                                                                                                                                                                           | 비고                       |
|--------------|-----------------|-----------------|-------------------------------------------------------------------------------------------------------------------------------------------------------------------------------------------------------------|--------------------------|
| 코로나 19 입원 환자 | 일반적인 정맥용 면역글로불린 | 표준치료 또는 무처치 대조군 | <ul style="list-style-type: none"> <li>· 사망</li> <li>· 기계환기/ECMO 치료</li> <li>· 기계환기/ECMO 치료 기간</li> <li>· 중환자실 치료</li> <li>· 중환자실 재실 기간</li> <li>· 중증 경과(산소 투여, HFNC, MV, ECMO)</li> <li>· 입원 기간</li> </ul> | 무작위배정 임상시험, 비교군이 있는 관찰연구 |



## ○ 권고문

코로나 19 환자에게 일반적인 정맥용 면역글로불린 (Conventional IVIG) 투여는 권고하지 않는다.  
다만 합병증 치료에서 적응증이 될 때에는 면역글로불린 사용을 배제하지 말아야 한다. (근거수준: 낮음, 권고등급: C)

## ○ 기타 항바이러스 관련 기본 정보

이론적으로 환자의 혈장에서 추출한 항체를 면역글로불린으로 제조하면 바이러스를 억제하고 염증 반응을 조절할 수 있다. 예를 들어 거대세포 바이러스 감염 예방을 위한 거대세포 바이러스 면역 글로불린은 안전하고 효과적인 것으로 알려져 있다. 하지만 코로나 19 환자에서 특이 항체를 포함한 면역글로불린에 대한 정보는 없다. 일반적으로 사용되는 면역글로불린이 면역에 도움이 될 수는 있으나 코로나 19 환자에 도움이 될 것인지는 명확하지 않다.

## ○ 근거 요약 (Evidence summary)

면역글로불린에 대한 권고를 포함한 가이드라인은 2개 가이드라인이 최종 선택되었다. 상기 가이드라인이 포함한 연구는 3편, 추가 검색을 통해 확인한 연구는 총 0편이었다. 최종 근거표에 포함된 연구는 총 3편으로 무작위배정 임상시험 2, (후향적 혹은 전향적) 코호트 연구 1편이었다.

종합된 근거 합성 결과는 다음과 같다.

Gharebaghi 등은 초기 치료에 반응하지 않는 중증의 코로나 19 환자에서 면역글로불린 투여군(30명)과 대조군(29명)의 무작위 이중 맹검 연구에서 면역글로불린 투여군에서 사망률이 유의하게 낮았다고 보고하였다 (6 [20.0%] vs. 14 [48.3%];  $P=0.022$ ) [187]. 동료 평가를 하지 않은 한 무작위배정 임상시험은 면역글로불린과 스테로이드 치료를 한 군(16명)이 표준 치료를 한 군(17명)에 비해 임상적 악화 비율이 적고 (2/14 vs. 7/12,  $P=0.038$ )과 중환자실 재실 기간이 짧았다고 보고하였다 (2.5일 vs. 12.5일,  $P=0.006$ ) [188]. Shao 등은 면역글로불린을 투여한 174명과 투여하지 않은 151명의 후향적 코호트 연구에서 재원 기간이 면역글로불린 투여 그룹에서 더 길었다는 보고를 하였으나, 이 연구는 무작위 배정이 되지 않은 연구이며 면역글로불린 투여 그룹의 나이가 많고 심혈관 질환이 더 많은 제한점이 있었다 [189].

## ○ 권고 고려사항

### 1. 근거수준

면역글로불린에 대해 연구한 무작위배정 임상시험은 2개 뿐이었으며, 소수의 환자를 대상으로 하였고 면역글로불린 용량, 투여 시점 등이 다르다는 제한점이 있었다. 따라서 비정밀성, 비일관성 측면에서 근거수준을 낮추어 종합 근거수준에서는 ‘낮음(Low)’으로 최종 평가하였다.

### 2. 이득과 위해

SARS-CoV-2 특이 면역글로불린에 대한 연구 결과는 없다. 2개의 무작위배정 임상시험에서 면역글로불린 투여군이 예후가 좋았다고 보고하였으나 단독 면역글로불린 연구의 효과는 1개뿐이었으며 소수의 환자를 대상으로 하였기 때문에 지금까지의 근거로 코로나 19에서 면



역글로불린의 이득은 명확하지 않다. 면역글로불린과 관련된 이미 알려진 부작용은 감기 증상, 피부반응, 부정맥, 저혈압, 수혈과 관련된 폐 손상 등이 있다[190].

### 3. 환자의 가치와 선호도

한국에서 코로나 19 환자를 대상으로 치료 약제 선택에 대한 가치와 선호도를 조사한 연구는 없다.

### 4. 자원(비용 포함)

코로나 19 환자에서 면역글로불린의 비용 효과에 대한 문헌은 없다. 국내에서는 일반적인 사람 면역글로불린이 유통되고 있으며 중증 감염증에서 하루 5g, 7일을 보험 인정해 주고 있으며 허가사항 범위를 초과하여 메르스 및 코로나 19 환자에서 패혈증 또는 급성 호흡곤란 증후군일 경우에 요양 급여를 인정하고 있다.

### 5. 국내 수용성과 적용성(Acceptability and Applicability)

#### 1) 다른 국가 임상진료지침과의 권고 비교

NIH 가이드라인에서는 SARS-CoV-2 면역글로불린 효과에 대한 충분한 자료가 없고 비특이적 면역글로불린은 임상 연구를 제외하고는 사용하지 말 것을 권하였다. 또한 NIH 지침은 합병증 치료에서 적응증이 될 때에는 면역글로불린 사용을 배제하지 말아야 한다고 하였다. ACPG는 임상 연구를 제외하고는 코로나 19 환자에서 면역글로불린과 스테로이드 병합 요법을 사용하지 말 것을 권하였다.

#### 2) 국내 수용성과 적용성 평가

한국보건의료연구원 임상진료지침 핸드북(2015)에서 개발된 국내 수용성과 적용성 평가도구를 활용하여 이들 5개 진료 지침에 대한 국내 수용성 및 적용성 평가를 수행하였다.

### 6. 기타 고려사항

국내에서는 혈장분획치료제에 대한 임상 연구를 진행 중이다.

## 향후 계획과 전망

위의 코로나 19 약물 치료 지침은 2020년 10월과 12월에 걸쳐 단기간에 진행되었기에 메타 분석과 다학제적 분석이 이루어지지 못하였다는 한계가 있어 추후 업데이트 된 문헌과 새로운 이슈들에 대한 정기적인 검토가 꾸준히 이루어질 예정이다. 현재 항체 치료제에 대한 권고 사항이 검토 중이며, 추후 대한 의회와 한국보건의료연구원은 중환자 치료, 소아 및 임신부, 면역 저하자를 포함한 기저 질환을 가진 환자군에서의 약물 치료를 포함한 다양한 치료에 관해 다학제 구성을 통해 포괄적인 지침서의 개발을 계획 중이며, 대한 감염학회 또한 여러 학회의 공동 노력에 주요 일원으로서 지속적으로 기여할 예정이다.

## REFERENCES

1. Lee YK, Shin ES, Shim JY, Min KJ, Kim JM, Lee SH. Developing a scoring guide for the Appraisal of Guidelines for Research and Evaluation II instrument in Korea: a modified Delphi consensus process. *J Korean Med Sci* 2013;28:190-4.  
[PUBMED](#) | [CROSSREF](#)
2. National Institutes of Health (NIH). Clinical spectrum of SARS-CoV-2 infection. Available at: <https://www.covid19treatmentguidelines.nih.gov/overview/clinical-spectrum/>. Accessed 17 December 2020.
3. Guyatt G, Oxman AD, Sultan S, Brozek J, Glasziou P, Alonso-Coello P, Atkins D, Kunz R, Montori V, Jaeschke R, Rind D, Dahm P, Akl EA, Meerpohl J, Vist G, Berliner E, Norris S, Falck-Ytter Y, Schünemann HJ. GRADE guidelines: 11. Making an overall rating of confidence in effect estimates for a single outcome and for all outcomes. *J Clin Epidemiol* 2013;66:151-7.  
[PUBMED](#) | [CROSSREF](#)
4. Schünemann H, Brozek J, Guyatt G, Oxman A. GRADE handbook. Available at: <https://gdt.gradepro.org/app/handbook/handbook.html>. Accessed 8 December 2020.
5. Brown AJ, Won JJ, Graham RL, Dinno KH 3rd, Sims AC, Feng JY, Cihlar T, Denison MR, Baric RS, Sheahan TP. Broad spectrum antiviral remdesivir inhibits human endemic and zoonotic deltacoronaviruses with a highly divergent RNA dependent RNA polymerase. *Antiviral Res* 2019;169:104541.  
[PUBMED](#) | [CROSSREF](#)
6. Sheahan TP, Sims AC, Graham RL, Menachery VD, Gralinski LE, Case JB, Leist SR, Pyrc K, Feng JY, Trantcheva I, Bannister R, Park Y, Babusis D, Clarke MO, Mackman RL, Spahn JE, Palmiotti CA, Siegel D, Ray AS, Cihlar T, Jordan R, Denison MR, Baric RS. Broad-spectrum antiviral GS-5734 inhibits both epidemic and zoonotic coronaviruses. *Sci Transl Med* 2017;9:eaal3653.  
[PUBMED](#) | [CROSSREF](#)
7. Sheahan TP, Sims AC, Leist SR, Schäfer A, Won J, Brown AJ, Montgomery SA, Hogg A, Babusis D, Clarke MO, Spahn JE, Bauer L, Sellers S, Porter D, Feng JY, Cihlar T, Jordan R, Denison MR, Baric RS. Comparative therapeutic efficacy of remdesivir and combination lopinavir, ritonavir, and interferon beta against MERS-CoV. *Nat Commun* 2020;11:222.  
[PUBMED](#) | [CROSSREF](#)
8. Dörnemann J, Burzio C, Ronsse A, Sprecher A, De Clerck H, Van Herp M, Kolić MC, Yosifiva V, Caluwaerts S, McElroy AK, Antierens A. First Newborn Baby to Receive Experimental Therapies Survives Ebola Virus Disease. *J Infect Dis* 2017;215:171-4.  
[PUBMED](#) | [CROSSREF](#)
9. Mulangu S, Dodd LE, Davey RT Jr, Tshiani Mbaya O, Proschan M, Mukadi D, Lusakibanza Manzo M, Nzolo D, Tshomba Oloma A, Ibanda A, Ali R, Coulibaly S, Levine AC, Grais R, Diaz J, Lane HC, Muyembe-Tamfum JJ, Sivahera B, Camara M, Kojan R, Walker R, Digheo-Kemp B, Cao H, Mukumbayi P, Mbala-Kingebeni P, Ahuka S, Albert S, Bonnett T, Crozier I, Duvenhage M, Proffitt C, Teitelbaum M, Moench T, Aboulhab J, Barrett K, Cahill K, Cone K, Eckes R, Hensley L, Herpin B, Higgs E, Ledgerwood J, Pierson J, Smolskis M, Sow Y, Tierney J, Sivapalasingam S, Holman W, Gettlinger N, Vallée D, Nordwall J; PALM Consortium Study Team. A Randomized, Controlled Trial of Ebola Virus Disease Therapeutics. *N Engl J Med* 2019;381:2293-303.  
[PUBMED](#) | [CROSSREF](#)
10. Beigel JH, Tomashek KM, Dodd LE, Mehta AK, Zingman BS, Kalil AC, Hohmann E, Chu HY, Luetkemeyer A, Kline S, Lopez de, Finberg RW, Dierberg K, Tapson V, Hsieh L, Patterson TF, Paredes R, Sweeney DA, Short WR, Touloumi G, Lye DC, Ohmagari N, Oh MD, Ruiz-Palacios GM, Benfield T, Fätkenheuer G, Kortepeter MG, Atmar RL, Creech CB, Lundgren J, Babiker AG, Pett S, Neaton JD, Burgess TH, Bonnett T, Green M, Makowski M, Osinusi A, Nayak S, Lane HC; ACTT-1 Study Group Members. Remdesivir for the Treatment of Covid-19 - Final Report. *N Engl J Med* 2020;383:1813-26.  
[PUBMED](#) | [CROSSREF](#)
11. WHO Solidarity Trial Consortium, Pan H, Peto R, Henao-Restrepo AM, Preziosi MP, Sathiyamoorthy V, Abdool Karim Q, Alejandria MM, Hernández García C, Kieny MP, Malekzadeh R, Murthy S, Reddy KS, Roses Periago M, Abi Hanna P, Ader F, Al-Bader AM, Alhasawi A, Allum E, Alotaibi A, Alvarez-Moreno CA, Appadoo S, Asiri A, Aukrust P, Barratt-Due A, Bellani S, Branca M, Cappel-Porter HBC, Cerrato N, Chow TS, Como N, Eustace J, García PJ, Godbole S, Gotuzzo E, Griskevicius L, Hamra R, Hassan M, Hassany M, Hutton D, Irmansyah I, Jancorini E, Kirwan J, Kumar S, Lennon P, Lopardo G, Lydon P, Magrini N, Maguire T, Manevska S, Manuel O, McGinty S, Medina MT, Mesa Rubio ML, Miranda-Montoya MC, Nel J, Nunes EP, Perola M, Portolés A, Rasmin MR, Raza A, Rees H, Reges PPS, Rogers CA, Salami K, Salvadori MI, Sinani N, Sterne JAC, Stevanovikj M, Tacconelli E, Tikkinen KAO, Trelle S, Zaid H,

- Røttingen JA, Swaminathan S. Repurposed antiviral drugs for Covid-19 - Interim WHO solidarity trial results. *N Engl J Med* 2021;384:497-511.
12. World Health Organization (WHO). Therapeutics and COVID-19: living guideline. Available at: <https://www.who.int/publications/i/item/therapeutics-and-covid-19-living-guideline>. Accessed 8 December 2020.
13. Wang Y, Zhang D, Du G, Du R, Zhao J, Jin Y, Fu S, Gao L, Cheng Z, Lu Q, Hu Y, Luo G, Wang K, Lu Y, Li H, Wang S, Ruan S, Yang C, Mei C, Wang Y, Ding D, Wu F, Tang X, Ye X, Ye Y, Liu B, Yang J, Yin W, Wang A, Fan G, Zhou F, Liu Z, Gu X, Xu J, Shang L, Zhang Y, Cao L, Guo T, Wan Y, Qin H, Jiang Y, Jaki T, Hayden FG, Horby PW, Cao B, Wang C. Remdesivir in adults with severe COVID-19: a randomised, double-blind, placebo-controlled, multicentre trial. *Lancet* 2020;395:1569-78.  
[PUBMED](#) | [CROSSREF](#)
14. Spinner CD, Gottlieb RL, Criner GJ, Arribas López JR, Cattelan AM, Soriano Viladomiu A, Ogbuagu O, Malhotra P, Mullane KM, Castagna A, Chai LYA, Roestenberg M, Tsang OTY, Bernasconi E, Le Turnier P, Chang SC, SenGupta D, Hyland RH, Osinusi AO, Cao H, Blair C, Wang H, Gaggar A, Brainard DM, McPhail MJ, Bhagani S, Ahn MY, Sanyal AJ, Huhn G, Marty FM; GS-US-540-5774 Investigators. Effect of remdesivir vs standard care on clinical status at 11 days in patients with moderate COVID-19: A randomized clinical trial. *JAMA* 2020;324:1048-57.  
[PUBMED](#) | [CROSSREF](#)
15. Joo EJ, Ko JH, Kim SE, Kang SJ, Baek JH, Heo EY, Shi HJ, Eom JS, Choe PG, Bae S, Ra SH, Kim DY, Kim BN, Kang YM, Kim JY, Chung JW, Chang HH, Bae S, Cheon S, Park Y, Choi H, Lee E, Lee BY, Park JW, Sohn Y, Heo JY, Kim SH, Peck KR. Clinical and virologic effectiveness of remdesivir treatment for severe coronavirus disease 2019 (COVID-19) in Korea: a nationwide multicenter retrospective cohort study. *J Korean Med Sci* 2021;36:e83.  
[PUBMED](#) | [CROSSREF](#)
16. Vincent MJ, Bergeron E, Benjannet S, Erickson BR, Rollin PE, Ksiazek TG, Seidah NG, Nichol ST. Chloroquine is a potent inhibitor of SARS coronavirus infection and spread. *Virol J* 2005;2:69.  
[PUBMED](#) | [CROSSREF](#)
17. Keyaerts E, Vijgen L, Maes P, Neyts J, Van Ranst M. *In vitro* inhibition of severe acute respiratory syndrome coronavirus by chloroquine. *Biochem Biophys Res Commun* 2004;323:264-8.  
[PUBMED](#) | [CROSSREF](#)
18. Barnard DL, Day CW, Bailey K, Heiner M, Montgomery R, Lauridsen L, Chan PK, Sidwell RW. Evaluation of immunomodulators, interferons and known *in vitro* SARS-coV inhibitors for inhibition of SARS-coV replication in BALB/c mice. *Antivir Chem Chemother* 2006;17:275-84.  
[PUBMED](#) | [CROSSREF](#)
19. Biot C, Daher W, Chavain N, Fandeur T, Khalife J, Dive D, De Clercq E. Design and synthesis of hydroxyferroquine derivatives with antimalarial and antiviral activities. *J Med Chem* 2006;49:2845-9.  
[PUBMED](#) | [CROSSREF](#)
20. McChesney EW. Animal toxicity and pharmacokinetics of hydroxychloroquine sulfate. *Am J Med* 1983;75:11-8.  
[PUBMED](#) | [CROSSREF](#)
21. Liu J, Cao R, Xu M, Wang X, Zhang H, Hu H, Li Y, Hu Z, Zhong W, Wang M. Hydroxychloroquine, a less toxic derivative of chloroquine, is effective in inhibiting SARS-CoV-2 infection *in vitro*. *Cell Discov* 2020;6:16.  
[CROSSREF](#)
22. Yao X, Ye F, Zhang M, Cui C, Huang B, Niu P, Liu X, Zhao L, Dong E, Song C. *In vitro* antiviral activity and projection of optimized dosing design of hydroxychloroquine for the treatment of severe acute respiratory syndrome coronavirus 2 (SARS-CoV-2). *Clin Infect Dis* 2020;71:732-9.  
[PUBMED](#) | [CROSSREF](#)
23. Huang C, Wang Y, Li X, Ren L, Zhao J, Hu Y, Zhang L, Fan G, Xu J, Gu X, Cheng Z, Yu T, Xia J, Wei Y, Wu W, Xie X, Yin W, Li H, Liu M, Xiao Y, Gao H, Guo L, Xie J, Wang G, Jiang R, Gao Z, Jin Q, Wang J, Cao B. Clinical features of patients infected with 2019 novel coronavirus in Wuhan, China. *Lancet* 2020;395:497-506.  
[PUBMED](#) | [CROSSREF](#)
24. Weniger H. Review of side effects and toxicity of chloroquine. Geneva: WHO; 1979.
25. Danesi R, Lupetti A, Barbara C, Ghelardi E, Chella A, Malizia T, Senesi S, Angeletti CA, Del Tacca M, Campa M. Comparative distribution of azithromycin in lung tissue of patients given oral daily doses of 500 and 1000 mg. *J Antimicrob Chemother* 2003;51:939-45.  
[PUBMED](#) | [CROSSREF](#)
26. Tran DH, Sugamata R, Hirose T, Suzuki S, Noguchi Y, Sugawara A, Ito F, Yamamoto T, Kawachi S, Akagawa KS, Omura S, Sunazuka T, Ito N, Mimaki M, Suzuki K. Azithromycin, a 15-membered macrolide antibiotic, inhibits influenza A(H1N1)pdm09 virus infection by interfering with virus internalization process. *J Antibiot (Tokyo)* 2019;72:759-68.  
[PUBMED](#) | [CROSSREF](#)

27. Iannetta M, Ippolito G, Nicastrì E. Azithromycin shows anti-Zika virus activity in human glial cells. *Antimicrob Agents Chemother* 2017;61:e01152-17.  
[PUBMED](#) | [CROSSREF](#)
28. Li C, Zu S, Deng YQ, Li D, Parvatiyar K, Quanquin N, Shang J, Sun N, Su J, Liu Z, Wang M, Aliyari SR, Li XF, Wu A, Ma F, Shi Y, Nielsev-Saines K, Jung JU, Qin FX, Qin CF, Cheng G. Azithromycin protects against Zika virus infection by upregulating virus-induced type I and III interferon responses. *Antimicrob Agents Chemother* 2019;63:e00394-19.  
[PUBMED](#) | [CROSSREF](#)
29. RECOVERY Collaborative Group, Horby P, Mafham M, Linsell L, Bell JL, Staplin N, Emberson JR, Wiselka M, Ustianowski A, Elmahi E, Prudon B, Whitehouse T, Felton T, Williams J, Faccenda J, Underwood J, Baillie JK, Chappell LC, Faust SN, Jaki T, Jeffery K, Lim WS, Montgomery A, Rowan K, Tarning J, Watson JA, White NJ, Juszczak E, Haynes R, Landray MJ. Effect of hydroxychloroquine in hospitalized patients with Covid-19. *N Engl J Med* 2020;383:2030-40.
30. Andreani J, Le Bideau M, Duflot I, Jardot P, Rolland C, Boxberger M, Wurtz N, Rolain JM, Colson P, La Scola B, Raoult D. In vitro testing of combined hydroxychloroquine and azithromycin on SARS-CoV-2 shows synergistic effect. *Microb Pathog* 2020;145:104228.  
[PUBMED](#) | [CROSSREF](#)
31. Kanoh S, Rubin BK. Mechanisms of action and clinical application of macrolides as immunomodulatory medications. *Clin Microbiol Rev* 2010;23:590-615.  
[PUBMED](#) | [CROSSREF](#)
32. Rosenberg ES, Dufort EM, Udo T, Wilberschied LA, Kumar J, Tesoriero J, Weinberg P, Kirkwood J, Muse A, DeHovitz J, Blog DS, Hutton B, Holtgrave DR, Zucker HA. Association of treatment with hydroxychloroquine or azithromycin with in-hospital mortality in patients with COVID-19 in New York state. *JAMA* 2020;323:2493-502.  
[PUBMED](#) | [CROSSREF](#)
33. Parnham MJ, Erakovic Haber V, Giamarellos-Bourboulis EJ, Perletti G, Verleden GM, Vos R. Azithromycin: mechanisms of action and their relevance for clinical applications. *Pharmacol Ther* 2014;143:225-45.  
[PUBMED](#) | [CROSSREF](#)
34. Gautret P, Lagier JC, Parola P, Hoang VT, Meddeb L, Sevestre J, Mailhe M, Doudier B, Aubry C, Amrane S, Seng P, Hocquart M, Eldin C, Finance J, Vieira VE, Tissot-Dupont HT, Honoré S, Stein A, Million M, Colson P, La Scola B, Veit V, Jacquier A, Deharo JC, Drancourt M, Fournier PE, Rolain JM, Brouqui P, Raoult D. Clinical and microbiological effect of a combination of hydroxychloroquine and azithromycin in 80 COVID-19 patients with at least a six-day follow up: A pilot observational study. *Travel Med Infect Dis* 2020;34:101663.  
[PUBMED](#) | [CROSSREF](#)
35. Bonny A, Talle MA, Ngantcha M, Tayebjee MH. Conflicting evidence on the efficacy of hydroxychloroquine and azithromycin as the early treatment of COVID-19. Comment on “Early treatment of COVID-19 patients with hydroxychloroquine and azithromycin: A retrospective analysis of 1061 cases in Marseille, France”. *Travel Med Infect Dis* 2020;37:101861.  
[PUBMED](#) | [CROSSREF](#)
36. Molina JM, Delaugerre C, Le Goff J, Mela-Lima B, Ponscarne D, Goldwirt L, de Castro N. No evidence of rapid antiviral clearance or clinical benefit with the combination of hydroxychloroquine and azithromycin in patients with severe COVID-19 infection. *Med Mal Infect* 2020;50:384.  
[PUBMED](#) | [CROSSREF](#)
37. Guérin V, Lévy P, Thomas JL, Lardenois T, Lacrosse P, Sarrazin E, de Andreis NR, Wonner M. Azithromycin and hydroxychloroquine accelerate recovery of outpatients with mild/moderate COVID-19. *Asian J Med Health* 2020;18:45-55.  
[CROSSREF](#)
38. Esper RB, da Silva RS, Oikawa FTC, Castro MM, Razuk-Filho A, Batista PB, Lotze SM, da Rocha CN, de Sá Cunha Filho R, de Oliveira SEB, Ribeiro PL, Martins VCV, Bueno FSB, Esper PLG, Parrillo EF. Empirical treatment with hydroxychloroquine and azithromycin for suspected cases of COVID-19 followed-up by telemedicine. Available at: <https://pgibertie.files.wordpress.com/2020/04/2020.04.15-journal-manuscript-final.pdf>. Accessed 8 December 2020.
39. Risch HA. Early outpatient treatment of symptomatic, high-risk COVID-19 patients that should be ramped-up immediately as key to the pandemic crisis. *Am J Epidemiol* 2020;189:1218-26.  
[PUBMED](#) | [CROSSREF](#)
40. Mahévas M, Tran VT, Roumier M, Chabrol A, Paule R, Guillaud C, Fois E, Lepeule R, Szwedebel TA, Lescure FX, Schlemmer F, Matignon M, Khellaf M, Crickx E, Terrier B, Morbieu C, Legendre P, Dang J, Schoindre Y, Pawlotsky JM, Michel M, Perrodeau E, Carlier N, Roche N, de Lastours V, Ourghanlian C, Kerneis S, Ménager P, Mouthon L, Audureau E, Ravaut P, Godeau B, Gallien S, Costedoat-Chalumeau N. Clinical

efficacy of hydroxychloroquine in patients with covid-19 pneumonia who require oxygen: observational comparative study using routine care data. *BMJ* 2020;369:m1844.

[PUBMED](#) | [CROSSREF](#)

41. Magagnoli J, Narendran S, Pereira F, Cummings TH, Hardin JW, Sutton SS, Ambati J. Outcomes of hydroxychloroquine usage in United States veterans hospitalized with COVID-19. *Med (N Y)* 2020;1:114-27.e3.  
[PUBMED](#) | [CROSSREF](#)
42. Geleris J, Sun Y, Platt J, Zucker J, Baldwin M, Hripcsak G, Labella A, Manson DK, Kubin C, Barr RG, Sobieszczyk ME, Schluger NW. Observational Study of Hydroxychloroquine in Hospitalized Patients with Covid-19. *N Engl J Med* 2020;382:2411-8.  
[PUBMED](#) | [CROSSREF](#)
43. Arshad S, Kilgore P, Chaudhry ZS, Jacobsen G, Wang DD, Huitsing K, Brar I, Alangaden GJ, Ramesh MS, McKinnon JE, O'Neill W, Zervos M; Henry Ford COVID-19 Task Force. Treatment with hydroxychloroquine, azithromycin, and combination in patients hospitalized with COVID-19. *Int J Infect Dis* 2020;97:396-403.  
[PUBMED](#) | [CROSSREF](#)
44. Cavalcanti AB, Zampieri FG, Rosa RG, Azevedo LCP, Veiga VC, Avezum A, Damiani LP, Marcadenti A, Kawano-Dourado L, Lisboa T, Junqueira DLM, de Barros E Silva PGM, Tramuja L, Abreu-Silva EO, Laranjeira LN, Soares AT, Echenique LS, Pereira AJ, Freitas FGR, Gebara OCE, Dantas VCS, Furtado RHM, Milan EP, Golin NA, Cardoso FF, Maia IS, Hoffmann Filho CR, Kormann APM, Amazonas RB, Bocchi de Oliveira MF, Serpa-Neto A, Falavigna M, Lopes RD, Machado FR, Berwanger O; Coalition Covid-19 Brazil I Investigators. Hydroxychloroquine with or without azithromycin in mild-to-moderate Covid-19. *N Engl J Med* 2020;383:2041-52.  
[PUBMED](#) | [CROSSREF](#)
45. Self WH, Semler MW, Leither LM, Casey JD, Angus DC, Brower RG, Chang SY, Collins SP, Eppensteiner JC, Filbin MR, Files DC, Gibbs KW, Ginde AA, Gong MN, Harrell FE Jr, Hayden DL, Hough CL, Johnson NJ, Khan A, Lindsell CJ, Matthay MA, Moss M, Park PK, Rice TW, Robinson BRH, Schoenfeld DA, Shapiro NI, Steingrub JS, Ulysse CA, Weissman A, Yealy DM, Thompson BT, Brown SM; National Heart, Lung, and Blood Institute PETAL Clinical Trials NetworkSteingrub J, Smithline H, Tiru B, Tidswell M, Kozikowski L, Thornton-Thompson S, De Souza L, Hou P, Baron R, Massaro A, Aisiku I, Fredenburgh L, Seethala R, Johnsky L, Riker R, Seder D, May T, Baumann M, Eldridge A, Lord C, Shapiro N, Talmor D, O'Mara T, Kirk C, Harrison K, Kurt L, Schermerhorn M, Banner-Goodspeed V, Boyle K, Dubosh N, Filbin M, Hibbert K, Parry B, Lavin-Parsons K, Pulido N, Lilley B, Lodenstein C, Margolin J, Brait K, Jones A, Galbraith J, Peacock R, Nandi U, Wachs T, Matthay M, Liu K, Kangelaris K, Wang R, Calfee C, Yee K, Hendey G, Chang S, Lim G, Qadir N, Tam A, Beutler R, Levitt J, Wilson J, Rogers A, Vojnik R, Roque J, Albertson T, Chenoweth J, Adams J, Pearson S, Juarez M, Almasri E, Fayed M, Hughes A, Hillard S, Huebinger R, Wang H, Vidales E, Patel B, Ginde A, Moss M, Baduashvili A, McKeehan J, Finck L, Higgins C, Howell M, Douglas I, Haukoos J, Hiller T, Lyle C, Cupelo A, Caruso E, Camacho C, Gravitz S, Finigan J, Griesmer C, Park P, Hyzy R, Nelson K, McDonough K, Olbrich N, Williams M, Kapoor R, Nash J, Willig M, Ford H, Gardner-Gray J, Ramesh M, Moses M, Ng Gong M, Aboodi M, Asghar A, Amosu O, Torres M, Kaur S, Chen JT, Hope A, Lopez B, Rosales K, Young You J, Mosier J, Hypes C, Natt B, Borg B, Salvaggio Campbell E, Hite RD, Hudock K, Cresie A, Alhasan F, Gomez-Arroyo J, Duggal A, Mehkri O, Hastings A, Sahoo D, Abi Fadel F, Gole S, Shaner V, Wimer A, Meli Y, King A, Terndrup T, Exline M, Pannu S, Robart E, Karow S, Hough C, Robinson M, Johnson N, Henning D, Campo M, Gundel S, Seghal S, Katsandres S, Dean S, Khan A, Krol O, Joustani M, Huynh P, Weissman A, Yealy D, Scholl D, Adams P, McVerry B, Huang D, Angus D, Schooler J, Moore S, Files C, Miller C, Gibbs K, LaRose M, Flores L, Koehler L, Morse C, Sanders J, Langford C, Nanney K, MdalaGausi M, Yeboah P, Morris P, Sturgill J, Seif S, Cassity E, Dhar S, de Wit M, Mason J, Goodwin A, Hall G, Grady A, Chamberlain A, Brown S, Bledsoe J, Leither L, Peltan I, Starr N, Fergus M, Aston V, Montgomery Q, Smith R, Merrill M, Brown K, Armbruster B, Harris E, Middleton E, Paine R, Johnson S, Barrios M, Eppensteiner J, Limkakeng A, McGowan L, Porter T, Bouffler A, Leahy JC, deBoisblanc B, Lammi M, Happel K, Lauto P, Self W, Casey J, Semler M, Collins S, Harrell F, Lindsell C, Rice T, Stubblefield W, Gray C, Johnson J, Roth M, Hays M, Torr D, Zakaria A, Schoenfeld D, Thompson T, Hayden D, Ringwood N, Oldmixon C, Ulysse C, Morse R, Muzikansky A, Fitzgerald L, Whitaker S, Lagakos A, Brower R, Reineck L, Aggarwal N, Bienstock K, Freemer M, MacLawi M, Weinmann G, Morrison L, Gillespie M, Kryscio R, Brodie D, Zareba W, Rompalo A, Boeckh M, Parsons P, Christie J, Hall J, Horton N, Zoloth L, Dickert N, Diercks D. Effect of Hydroxychloroquine on Clinical Status at 14 Days in Hospitalized Patients With COVID-19: A Randomized Clinical Trial. *JAMA* 2020;324:2165-76.  
[PUBMED](#) | [CROSSREF](#)
46. Ulrich RJ, Troxel AB, Carmody E, Eapen J, Bäcker M, DeHovitz JA, Prasad PJ, Li Y, Delgado C, Irada M, Robbins GA, Henderson B, Hrycko A, Delpachitra D, Raabe V, Austrian JS, Dubrovskaya Y, Mulligan MJ. Treating COVID-19 with hydroxychloroquine (TEACH): a multicenter, double-blind randomized controlled trial in hospitalized patients. *Open Forum Infect Dis* 2020;7:ofaa446.  
[PUBMED](#) | [CROSSREF](#)

47. Abd-Elsalam S, Esmail ES, Khalaf M, Abdo EF, Medhat MA, Abd El Ghafar MS, Ahmed OA, Soliman S, Serangawy GN, Alboraie M. Hydroxychloroquine in the treatment of COVID-19: a multicenter randomized controlled study. *Am J Trop Med Hyg* 2020;103:1635-9.  
[PUBMED](#) | [CROSSREF](#)
48. Chen J, Liu D, Liu L, Liu P, Xu Q, Xia L, Ling Y, Huang D, Song S, Zhang D, Qian Z, Li T, Shen Y, Lu H. A pilot study of hydroxychloroquine in treatment of patients with moderate COVID-19. *Zhejiang Da Xue Xue Bao Yi Xue Ban* 2020;49:215-9.  
[PUBMED](#)
49. Lyngbakken MN, Berdal JE, Eskesen A, Kvale D, Olsen IC, Rueegg CS, Rangberg A, Jonassen CM, Omland T, Røsjø H, Dalgard O. A pragmatic randomized controlled trial reports lack of efficacy of hydroxychloroquine on coronavirus disease 2019 viral kinetics. *Nat Commun* 2020;11:5284.  
[PUBMED](#) | [CROSSREF](#)
50. Tang W, Cao Z, Han M, Wang Z, Chen J, Sun W, Wu Y, Xiao W, Liu S, Chen E, Chen W, Wang X, Yang J, Lin J, Zhao Q, Yan Y, Xie Z, Li D, Yang Y, Liu L, Qu J, Ning G, Shi G, Xie Q. Hydroxychloroquine in patients with mainly mild to moderate coronavirus disease 2019: open label, randomised controlled trial. *BMJ* 2020;369:m1849.  
[PUBMED](#) | [CROSSREF](#)
51. Chen L, Zhang ZY, Fu JG, Feng ZP, Zhang SZ, Han QY, Zhang XB, Xiao X, Chen HM, Liu LL, Chen XL, Lan YP, Zhong DJ, Hu L, Wang JH, Yu XH, She DY, Zhu YH, Yin ZY. Efficacy and safety of chloroquine or hydroxychloroquine in moderate type of COVID-19: a prospective open-label randomized controlled study. *MedRxiv* 2020 [Epub ahead of print]
52. Mitjà O, Corbacho-Monné M, Ubals M, Tebe C, Peñafiel J, Tobias A, Ballana E, Alemany A, Riera-Martí N, Pérez CA, Suñer C, Laporte P, Admella P, Mitjà J, Clua M, Bertran L, Sarquella M, Gavilán S, Ara J, Argimon JM, Casabona J, Cuatrecasas G, Cañadas P, Elizalde-Torrent A, Fabregat R, Farré M, Forcada A, Flores-Mateo G, Muntada E, Nadal N, Narejos S, Gil-Ortega AN, Prat N, Puig J, Quiñones C, Reyes-Ureña J, Ramírez-Viaplana F, Ruiz L, Riveira-Muñoz E, Sierra A, Velasco C, Vivanco-Hidalgo RM, Sentís A; BCN PEP-CoV-2 RESEARCH GROUP. Hydroxychloroquine for early treatment of adults with mild Covid-19: a randomized-controlled trial. *Clin Infect Dis* 2020;ciaa1009.  
[PUBMED](#)
53. Skipper CP, Pastick KA, Engen NW, Bangdiwala AS, Abassi M, Lofgren SM, Williams DA, Okafor EC, Pullen MF, Nicol MR, Nascene AA, Hullsiek KH, Cheng MP, Luke D, Lother SA, MacKenzie LJ, Drobot G, Kelly LE, Schwartz IS, Zarychanski R, McDonald EG, Lee TC, Rajasingham R, Boulware DR. Hydroxychloroquine in nonhospitalized adults with early COVID-19: a randomized Trial. *Ann Intern Med* 2020;173:623-31.  
[PUBMED](#) | [CROSSREF](#)
54. Chen CP, Lin YC, Chen TC, Tseng TY, Wong HL, Kuo CY, Lin WP, Huang SR, Wang WY, Liao JH, Liao CS, Hung YP, Lin TH, Chang TY, Hsiao CF, Huang YW, Chung WS, Cheng CY, Cheng SH; Taiwan HCQ Study Group. A multicenter, randomized, open-label, controlled trial to evaluate the efficacy and tolerability of hydroxychloroquine and a retrospective study in adult patients with mild to moderate coronavirus disease 2019 (COVID-19). *PLoS One* 2020;15:e0242763.  
[PUBMED](#) | [CROSSREF](#)
55. Mikami T, Miyashita H, Yamada T, Harrington M, Steinberg D, Dunn A, Siau E. Risk factors for mortality in patients with COVID-19 in New York city. *J Gen Intern Med* 2021;36:17-26.  
[PUBMED](#) | [CROSSREF](#)
56. Catteau L, Dauby N, Montourcy M, Bottieau E, Hautekiet J, Goetghebuer E, van Ierssel S, Duysburgh E, Van Oyen H, Wyndham-Thomas C, Van Beckhoven D; Belgian Collaborative Group on COVID-19 Hospital Surveillance. Low-dose hydroxychloroquine therapy and mortality in hospitalised patients with COVID-19: a nationwide observational study of 8075 participants. *Int J Antimicrob Agents* 2020;56:106144.  
[PUBMED](#) | [CROSSREF](#)
57. The COVID-19 RISK and Treatments (CORIST) Collaboration. Use of hydroxychloroquine in hospitalised COVID-19 patients is associated with reduced mortality: Findings from the observational multicentre Italian CORIST study. *Eur J Intern Med* 2020;82:38-47.  
[PUBMED](#) | [CROSSREF](#)
58. Yu B, Li C, Chen P, Zhou N, Wang L, Li J, Jiang H, Wang DW. Low dose of hydroxychloroquine reduces fatality of critically ill patients with COVID-19. *Sci China Life Sci* 2020;63:1515-21.  
[PUBMED](#) | [CROSSREF](#)
59. Sente Fonseca SN, de Queiroz Sousa A, Wolkoff AG, Moreira MS, Pinto BC, Valente Takeda CF, Rebouças E, Vasconcellos Abdon AP, Nascimento ALA, Risch HA. Risk of hospitalization for Covid-19 outpatients treated with various drug regimens in Brazil: Comparative analysis. *Travel Med Infect Dis* 2020;38:101906.  
[PUBMED](#) | [CROSSREF](#)

60. Huang HD, Jneid H, Aziz M, Ravi V, Sharma PS, Larsen T, Chatterjee N, Saour B, Aziz Z, Nayak H, Trohman RG, Krishnan K. Safety and effectiveness of hydroxychloroquine and azithromycin combination therapy for treatment of hospitalized patients with COVID-19: a propensity-matched study. *Cardiol Ther* 2020;9:523-34.  
[PUBMED](#) | [CROSSREF](#)
61. Annie FH, Sirbu C, Frazier KR, Broce M, Lucas BD Jr. Hydroxychloroquine in hospitalized patients with COVID-19: real-world experience assessing mortality. *Pharmacotherapy* 2020;40:1072-81.  
[PUBMED](#) | [CROSSREF](#)
62. Kalligeros M, Shehadeh F, Atalla E, Mylona EK, Aung S, Pandita A, Larkin J, Sanchez M, Touzard-Romo F, Brotherton A, Shah R, Cunha CB, Mylonakis E. Hydroxychloroquine use in hospitalised patients with COVID-19: an observational matched cohort study. *J Glob Antimicrob Resist* 2020;22:842-4.  
[PUBMED](#) | [CROSSREF](#)
63. Paccoud O, Tubach F, Baptiste A, Bleibtreu A, Hajage D, Monsel G, Tebano G, Boutolleau D, Klement E, Godefroy N, Palich R, Itani O, Fayssal A, Valantin MA, Tubiana R, Burrel S, Calvez V, Caumes E, Marcelin AG, Pourcher V. Compassionate use of hydroxychloroquine in clinical practice for patients with mild to severe Covid-19 in a French university hospital. *Clin Infect Dis* 2020:ciaa791.  
[PUBMED](#) | [CROSSREF](#)
64. Satlin MJ, Goyal P, Magleby R, Maldarelli GA, Pham K, Kondo M, Schenck EJ, Rennert H, Westblade LF, Choi JJ, Safford MM, Gulick RM. Safety, tolerability, and clinical outcomes of hydroxychloroquine for hospitalized patients with coronavirus 2019 disease. *PLoS One* 2020;15:e0236778.  
[PUBMED](#) | [CROSSREF](#)
65. Furtado RHM, Berwanger O, Fonseca HA, Corrêa TD, Ferraz LR, Lapa MG, Zampieri FG, Veiga VC, Azevedo LCP, Rosa RG, Lopes RD, Avezum A, Manoel ALO, Piza FMT, Martins PA, Lisboa TC, Pereira AJ, Olivato GB, Dantas VCS, Milan EP, Gebara OCE, Amazonas RB, Oliveira MB, Soares RVP, Moia DDF, Piano LPA, Castilho K, Momesso RGRAP, Schettino GPP, Rizzo LV, Neto AS, Machado FR, Cavalcanti AB; COALITION COVID-19 Brazil II Investigators. Azithromycin in addition to standard of care versus standard of care alone in the treatment of patients admitted to the hospital with severe COVID-19 in Brazil (COALITION II): a randomised clinical trial. *Lancet* 2020;396:959-67.  
[PUBMED](#) | [CROSSREF](#)
66. Gautret P, Lagier JC, Parola P, Hoang VT, Meddeb L, Mailhe M, Doudier B, Courjon J, Giordanengo V, Vieira VE, Tissot Dupont H, Honoré S, Colson P, Chabrière E, La Scola B, Rolain JM, Brouqui P, Raoult D. Hydroxychloroquine and azithromycin as a treatment of COVID-19: results of an open-label non-randomized clinical trial. *Int J Antimicrob Agents* 2020;56:105949.  
[PUBMED](#) | [CROSSREF](#)
67. Faico-Filho KS, Conte DD, de Souza Luna LK, Carvalho JMA, Perosa AHS, Bellei N. No benefit of hydroxychloroquine on SARS-CoV-2 viral load reduction in non-critical hospitalized patients with COVID-19. *Braz J Microbiol* 2020;51:1765-9.  
[PUBMED](#) | [CROSSREF](#)
68. Karolyi M, Pawelka E, Mader T, Omid S, Kelani H, Ely S, Jilma B, Baumgartner S, Laferl H, Ott C, Traugott M, Turner M, Seitz T, Wenisch C, Zoufaly A. Hydroxychloroquine versus lopinavir/ritonavir in severe COVID-19 patients : Results from a real-life patient cohort. *Wien Klin Wochenschr* 2020:1-8.  
[PUBMED](#)
69. Kim JW, Kim EJ, Kwon HH, Jung CY, Kim KC, Choe JY, Hong HL. Lopinavir-ritonavir versus hydroxychloroquine for viral clearance and clinical improvement in patients with mild to moderate coronavirus disease 2019. *Korean J Intern Med* 2021;36(Suppl 1):S253-63.  
[PUBMED](#) | [CROSSREF](#)
70. Lecronier M, Beurton A, Burrel S, Haudebourg L, Deleris R, Le Marec J, Virolle S, Nemlaghi S, Bureau C, Mora P, De Sarcus M, Clovet O, Duceau B, Grisot PH, Pari MH, Arzoine J, Clarac U, Boutolleau D, Raux M, Delemazure J, Faure M, Decavele M, Morawiec E, Mayaux J, Demoule A, Dres M. Comparison of hydroxychloroquine, lopinavir/ritonavir, and standard of care in critically ill patients with SARS-CoV-2 pneumonia: an opportunistic retrospective analysis. *Crit Care* 2020;24:418.  
[PUBMED](#) | [CROSSREF](#)
71. Chan KS, Lai ST, Chu CM, Tsui E, Tam CY, Wong MM, Tse MW, Que TL, Peiris JS, Sung J, Wong VC, Yuen KY. Treatment of severe acute respiratory syndrome with lopinavir/ritonavir: a multicentre retrospective matched cohort study. *Hong Kong Med J* 2003;9:399-406.  
[PUBMED](#)
72. Choy KT, Wong AY, Kaewpreedee P, Sia SF, Chen D, Hui KPY, Chu DKW, Chan MCW, Cheung PP, Huang X, Peiris M, Yen HL. Remdesivir, lopinavir, emetine, and homoharringtonine inhibit SARS-CoV-2 replication in vitro. *Antiviral Res* 2020;178:104786.  
[PUBMED](#) | [CROSSREF](#)

73. RECOVERY Collaborative Group. Lopinavir-ritonavir in patients admitted to hospital with COVID-19 (RECOVERY): a randomised, controlled, open-label, platform trial. *Lancet* 2020;396:1345-52.  
[CROSSREF](#)
74. Cao B, Wang Y, Wen D, Liu W, Wang J, Fan G, Ruan L, Song B, Cai Y, Wei M, Li X, Xia J, Chen N, Xiang J, Yu T, Bai T, Xie X, Zhang L, Li C, Yuan Y, Chen H, Li H, Huang H, Tu S, Gong F, Liu Y, Wei Y, Dong C, Zhou F, Gu X, Xu J, Liu Z, Zhang Y, Li H, Shang L, Wang K, Li K, Zhou X, Dong X, Qu Z, Lu S, Hu X, Ruan S, Luo S, Wu J, Peng L, Cheng F, Pan L, Zou J, Jia C, Wang J, Liu X, Wang S, Wu X, Ge Q, He J, Zhan H, Qiu F, Guo L, Huang C, Jia T, Hayden FG, Horby PW, Zhang D, Wang C. A Trial of Lopinavir-Ritonavir in Adults Hospitalized with Severe Covid-19. *N Engl J Med* 2020;382:1787-99.  
[PUBMED](#) | [CROSSREF](#)
75. Li Y, Xie Z, Lin W, Cai W, Wen C, Guan Y, Mo X, Wang J, Wang Y, Peng P, Chen X, Hong W, Xiao G, Liu J, Zhang L, Hu F, Li F, Zhang F, Deng X, Li L. Efficacy and Safety of Lopinavir/Ritonavir or Arbidol in Adult Patients with Mild/Moderate COVID-19: An Exploratory Randomized Controlled Trial. *Med (N Y)* 2020;1:105-13.e4.  
[PUBMED](#) | [CROSSREF](#)
76. Arshad U, Pertinez H, Box H, Tatham L, Rajoli RKR, Curley P, Neary M, Sharp J, Liptrott NJ, Valentijn A, David C, Rannard SP, O'Neill PM, Aljayoussi G, Pennington SH, Ward SA, Hill A, Back DJ, Khoo SH, Bray PG, Biagini GA, Owen A. Prioritization of anti-SARS-Cov-2 drug repurposing opportunities based on plasma and target site concentrations derived from their established human pharmacokinetics. *Clin Pharmacol Ther* 2020;108:775-90.  
[PUBMED](#) | [CROSSREF](#)
77. Shiraki K, Daikoku T. Favipiravir, an anti-influenza drug against life-threatening RNA virus infections. *Pharmacol Ther* 2020;209:107512.  
[PUBMED](#) | [CROSSREF](#)
78. Furuta Y, Gowen BB, Takahashi K, Shiraki K, Smee DF, Barnard DL. Favipiravir (T-705), a novel viral RNA polymerase inhibitor. *Antiviral Res* 2013;100:446-54.  
[PUBMED](#) | [CROSSREF](#)
79. Wang M, Cao R, Zhang L, Yang X, Liu J, Xu M, Shi Z, Hu Z, Zhong W, Xiao G. Remdesivir and chloroquine effectively inhibit the recently emerged novel coronavirus (2019-nCoV) in vitro. *Cell Res* 2020;30:269-71.  
[PUBMED](#) | [CROSSREF](#)
80. Ströher U, DiCaro A, Li Y, Strong JE, Aoki F, Plummer F, Jones SM, Feldmann H. Severe acute respiratory syndrome-related coronavirus is inhibited by interferon- alpha. *J Infect Dis* 2004;189:1164-7.  
[PUBMED](#) | [CROSSREF](#)
81. Chu CM, Cheng VC, Hung IF, Wong MM, Chan KH, Chan KS, Kao RY, Poon LL, Wong CL, Guan Y, Peiris JS, Yuen KY; HKU/UCH SARS Study Group. Role of lopinavir/ritonavir in the treatment of SARS: initial virological and clinical findings. *Thorax* 2004;59:252-6.  
[PUBMED](#) | [CROSSREF](#)
82. Tan EL, Ooi EE, Lin CY, Tan HC, Ling AE, Lim B, Stanton LW. Inhibition of SARS coronavirus infection in vitro with clinically approved antiviral drugs. *Emerg Infect Dis* 2004;10:581-6.  
[PUBMED](#) | [CROSSREF](#)
83. Chan JF, Chan KH, Kao RY, To KK, Zheng BJ, Li CP, Li PT, Dai J, Mok FK, Chen H, Hayden FG, Yuen KY. Broad-spectrum antivirals for the emerging Middle East respiratory syndrome coronavirus. *J Infect* 2013;67:606-16.  
[PUBMED](#) | [CROSSREF](#)
84. Stockman LJ, Bellamy R, Garner P. SARS: systematic review of treatment effects. *PLoS Med* 2006;3:e343.  
[PUBMED](#) | [CROSSREF](#)
85. Chen F, Chan KH, Jiang Y, Kao RY, Lu HT, Fan KW, Cheng VC, Tsui WH, Hung IF, Lee TS, Guan Y, Peiris JS, Yuen KY. In vitro susceptibility of 10 clinical isolates of SARS coronavirus to selected antiviral compounds. *J Clin Virol* 2004;31:69-75.  
[PUBMED](#) | [CROSSREF](#)
86. Morgenstern B, Michaelis M, Baer PC, Doerr HW, Cinatl J Jr. Ribavirin and interferon-beta synergistically inhibit SARS-associated coronavirus replication in animal and human cell lines. *Biochem Biophys Res Commun* 2005;326:905-8.  
[PUBMED](#) | [CROSSREF](#)
87. Blaising J, Polyak SJ, Pécheur EI. Arbidol as a broad-spectrum antiviral: an update. *Antiviral Res* 2014;107:84-94.  
[PUBMED](#) | [CROSSREF](#)
88. Wang X, Cao R, Zhang H, Liu J, Xu M, Hu H, Li Y, Zhao L, Li W, Sun X, Yang X, Shi Z, Deng F, Hu Z, Zhong W, Wang M. The anti-influenza virus drug, arbidol is an efficient inhibitor of SARS-CoV-2 in vitro. *Cell Discov* 2020;6:28.  
[PUBMED](#) | [CROSSREF](#)



89. Shirley M. Baloxavir marboxil: a review in acute uncomplicated influenza. *Drugs* 2020;80:1109-18.  
[PUBMED](#) | [CROSSREF](#)
90. Lou Y, Liu L, Yao H, Hu X, Su J, Xu K, Luo R, Yang X, He L, Lu X, Zhao Q, Liang T, Qiu Y. Clinical Outcomes and Plasma Concentrations of Baloxavir Marboxil and Favipiravir in COVID-19 Patients: An Exploratory Randomized, Controlled Trial. *Eur J Pharm Sci* 2021;157:105631.  
[PUBMED](#) | [CROSSREF](#)
91. Chen C, Zhang Y, Huang J, Yin P, Cheng Z, Wu J, Chen S, Zhang Y, Chen B, Lu M, Luo Y, Ju L, Zhang J, Wang X. Favipiravir versus arbidol for COVID-19: a randomized clinical trial. *medRxiv* 2020:03.17.20037432.
92. Ivashchenko AA, Dmitriev KA, Vostokova NV, Azarova VN, Blinow AA, Egorova AN, Gordeev IG, Ilin AP, Karapetian RN, Kravchenko DV, Lomakin NV, Merkulova EA, Papazova NA, Pavlikova EP, Savchuk NP, Simakina EN, Sitdekov TA, Smolyarchuk EA, Tikhomolova EG, Yakubova EV, Ivachtchenko AV. AVIFAVIR for treatment of patients with moderate COVID-19: interim results of a phase II/III multicenter randomized clinical trial. *Clin Infect Dis* 2020:ciaa1176.  
[PUBMED](#) | [CROSSREF](#)
93. Doi Y, Hibino M, Hase R, Yamamoto M, Kasamatsu Y, Hirose M, Mutoh Y, Homma Y, Terada M, Ogawa T, Kashizaki F, Yokoyama T, Koba H, Kasahara H, Yokota K, Kato H, Yoshida J, Kita T, Kato Y, Kamio T, Kodama N, Uchida Y, Ikeda N, Shinoda M, Nakagawa A, Nakatsumi H, Horiguchi T, Iwata M, Matsuyama A, Banno S, Koseki T, Teramachi M, Miyata M, Tajima S, Maeki T, Nakayama E, Taniguchi S, Lim CK, Saijo M, Imai T, Yoshida H, Kabata D, Shintani A, Yuzawa Y, Kondo M. A prospective, randomized, open-label trial of early versus late favipiravir therapy in hospitalized patients with COVID-19. *Antimicrob Agents Chemother* 2020;64:e01897-20.  
[PUBMED](#) | [CROSSREF](#)
94. Cai Q, Yang M, Liu D, Chen J, Shu D, Xia J, Liao X, Gu Y, Cai Q, Yang Y, Shen C, Li X, Peng L, Huang D, Zhang J, Zhang S, Wang F, Liu J, Chen L, Chen S, Wang Z, Zhang Z, Cao R, Zhong W, Liu Y, Liu L. Experimental treatment with favipiravir for COVID-19: an open-label control study. *Engineering (Beijing)* 2020;6:1192-8.  
[PUBMED](#) | [CROSSREF](#)
95. Kocayigit H, Özmen Süner K, Tomak Y, Demir G, Yaylacı S, Dheir H, Güçlü E, Erdem AF. Observational study of the effects of favipiravir vs lopinavir/ritonavir on clinical outcomes in critically ill patients with COVID-19. *J Clin Pharm Ther* 2021;46:454-9.  
[PUBMED](#) | [CROSSREF](#)
96. Yethindra V, Tagaev T, Uulu MS, Parihar Y. Efficacy of umifenovir in the treatment of mild and moderate COVID-19 patients. *Int J Pharm Sci Res* 2020;11:506-9.  
[CROSSREF](#)
97. Zhu Z, Lu Z, Xu T, Chen C, Yang G, Zha T, Lu J, Xue Y. Arbidol monotherapy is superior to lopinavir/ritonavir in treating COVID-19. *J Infect* 2020;81:e21-3.  
[PUBMED](#) | [CROSSREF](#)
98. Deng L, Li C, Zeng Q, Liu X, Li X, Zhang H, Hong Z, Xia J. Arbidol combined with LPV/r versus LPV/r alone against corona virus disease 2019: a retrospective cohort study. *J Infect* 2020;81:e1-5.  
[PUBMED](#) | [CROSSREF](#)
99. Lian N, Xie H, Lin S, Huang J, Zhao J, Lin Q. Umifenovir treatment is not associated with improved outcomes in patients with coronavirus disease 2019: a retrospective study. *Clin Microbiol Infect* 2020;26:917-21.  
[PUBMED](#) | [CROSSREF](#)
100. Fang J, Li H, Du W, Yu P, Guan YY, Ma SY, Liu D, Chen W, Shi GC, Bian XL. Efficacy of early combination therapy with lianhuaqingwen and arbidol in moderate and severe COVID-19 patients: a retrospective cohort study. *Front Pharmacol* 2020;11:560209.  
[PUBMED](#) | [CROSSREF](#)
101. Chen W, Yao M, Fang Z, Lv X, Deng M, Wu Z. A study on clinical effect of Arbidol combined with adjuvant therapy on COVID-19. *J Med Virol* 2020;92:2702-8.  
[PUBMED](#) | [CROSSREF](#)
102. Gao W, Chen S, Wang K, Chen R, Guo Q, Lu J, Wu X, He Y, Yan Q, Wang S, Wang F, Jin L, Hua J, Li Q. Clinical features and efficacy of antiviral drug, Arbidol in 220 nonemergency COVID-19 patients from East-West-Lake Shelter Hospital in Wuhan: a retrospective case series. *Virol J* 2020;17:162.  
[PUBMED](#) | [CROSSREF](#)
103. Hung IF, Lung KC, Tso EY, Liu R, Chung TW, Chu MY, Ng YY, Lo J, Chan J, Tam AR, Shum HP, Chan V, Wu AK, Sin KM, Leung WS, Law WL, Lung DC, Sin S, Yeung P, Yip CC, Zhang RR, Fung AY, Yan EY, Leung KH, Ip JD, Chu AW, Chan WM, Ng AC, Lee R, Fung K, Yeung A, Wu TC, Chan JW, Yan WW, Chan WM, Chan JF, Lie AK, Tsang OT, Cheng VC, Que TL, Lau CS, Chan KH, To KK, Yuen KY. Triple combination of

- interferon beta-1b, lopinavir-ritonavir, and ribavirin in the treatment of patients admitted to hospital with COVID-19: an open-label, randomised, phase 2 trial. *Lancet* 2020;395:1695-704.  
[PUBMED](#) | [CROSSREF](#)
104. Huang YQ, Tang SQ, Xu XL, Zeng YM, He XQ, Li Y, Harypursat V, Lu YQ, Wan Y, Zhang L, Sun QZ, Sun NN, Wang GX, Yang ZP, Chen YK. No statistically apparent difference in antiviral effectiveness observed among ribavirin plus interferon-alpha, lopinavir/ritonavir plus interferon-alpha, and ribavirin plus lopinavir/ritonavir plus interferon-alpha in patients with mild to moderate coronavirus disease 2019: results of a randomized, open-labeled prospective study. *Front Pharmacol* 2020;11:1071.  
[PUBMED](#) | [CROSSREF](#)
  105. Abbaspour Kasgari H, Moradi S, Shabani AM, Babamahmoodi F, Davoudi Badabi AR, Davoudi L, Alikhani A, Hedayatizadeh Omran A, Saeedi M, Merat S, Wentzel H, Garratt A, Levi J, Simmons B, Hill A, Targar Fakheri H. Evaluation of the efficacy of sofosbuvir plus daclatasvir in combination with ribavirin for hospitalized COVID-19 patients with moderate disease compared with standard care: a single-centre, randomized controlled trial. *J Antimicrob Chemother* 2020;75:3373-8.  
[PUBMED](#) | [CROSSREF](#)
  106. Yuan J, Zou R, Zeng L, Kou S, Lan J, Li X, Liang Y, Ding X, Tan G, Tang S, Liu L, Liu Y, Pan Y, Wang Z. The correlation between viral clearance and biochemical outcomes of 94 COVID-19 infected discharged patients. *Inflamm Res* 2020;69:599-606.  
[PUBMED](#) | [CROSSREF](#)
  107. Tong S, Su Y, Yu Y, Wu C, Chen J, Wang S, Jiang J. Ribavirin therapy for severe COVID-19: a retrospective cohort study. *Int J Antimicrob Agents* 2020;56:106114.  
[PUBMED](#) | [CROSSREF](#)
  108. Eslami G, Mousaviasl S, Radmanesh E, Jelvey S, Bitaraf S, Simmons B, Wentzel H, Hill A, Sadeghi A, Freeman J, Salmanzadeh S, Esmailian H, Mobarak M, Tabibi R, Jafari Kashi AH, Lotfi Z, Talebzadeh SM, Wickramatillake A, Momtazan M, Hajizadeh Farsani M, Marjani S, Mobarak S. The impact of sofosbuvir/daclatasvir or ribavirin in patients with severe COVID-19. *J Antimicrob Chemother* 2020;75:3366-72.  
[PUBMED](#) | [CROSSREF](#)
  109. Lund LH, Khush KK, Cherikh WS, Goldfarb S, Kucheryavaya AY, Levvey BJ, Meiser B, Rossano JW, Chambers DC, Yusen RD, Stehlik J; International Society for Heart and Lung Transplantation. The registry of the international society for heart and lung transplantation: thirty-fourth adult heart transplantation report-2017; focus theme: allograft ischemic time. *J Heart Lung Transplant* 2017;36:1037-46.  
[PUBMED](#) | [CROSSREF](#)
  110. Franchimont D, Kino T, Galon J, Meduri GU, Chrousos G. Glucocorticoids and inflammation revisited: the state of the art. NIH clinical staff conference. *Neuroimmunomodulation* 2002-2003;10:247-60.  
[PUBMED](#) | [CROSSREF](#)
  111. Krafft P, Fridrich P, Pernerstorfer T, Fitzgerald RD, Koc D, Schneider B, Hammerle AF, Steltzer H. The acute respiratory distress syndrome: definitions, severity and clinical outcome. An analysis of 101 clinical investigations. *Intensive Care Med* 1996;22:519-29.  
[PUBMED](#) | [CROSSREF](#)
  112. Meduri GU, Kohler G, Headley S, Tolley E, Stentz F, Postlethwaite A. Inflammatory cytokines in the BAL of patients with ARDS. Persistent elevation over time predicts poor outcome. *Chest* 1995;108:1303-14.  
[PUBMED](#) | [CROSSREF](#)
  113. Meduri GU, Headley S, Kohler G, Stentz F, Tolley E, Umberger R, Leeper K. Persistent elevation of inflammatory cytokines predicts a poor outcome in ARDS. Plasma IL-1 beta and IL-6 levels are consistent and efficient predictors of outcome over time. *Chest* 1995;107:1062-73.  
[PUBMED](#) | [CROSSREF](#)
  114. Chrousos GP. The hypothalamic-pituitary-adrenal axis and immune-mediated inflammation. *N Engl J Med* 1995;332:1351-62.  
[PUBMED](#) | [CROSSREF](#)
  115. Arabi YM, Mandourah Y, Al-Hameed F, Sindi AA, Almekhlafi GA, Hussein MA, Jose J, Pinto R, Al-Omari A, Kharaba A, Almotairi A, Al Khatib K, Alraddadi B, Shalhoub S, Abdulmomen A, Qushmaq I, Mady A, Solaiman O, Al-Aithan AM, Al-Raddadi R, Ragab A, Balkhy HH, Al Harthy A, Deeb AM, Al Mutairi H, Al-Dawood A, Merson L, Hayden FG, Fowler RA; Saudi critical care trial group. Saudi critical care trial group. Corticosteroid therapy for critically ill patients with middle east respiratory syndrome. *Am J Respir Crit Care Med* 2018;197:757-67.  
[PUBMED](#) | [CROSSREF](#)
  116. Rochwerf B, Oczkowski SJ, Siemieniuk RAC, Agoritsas T, Belley-Cote E, D'Aragon F, Duan E, English S, Gossack-Keenan K, Alghuroba M, Szczeklik W, Menon K, Alhazzani W, Sevransky J, Vandvik PO, Annane D, Guyatt G. Corticosteroids in sepsis: an updated systematic review and meta-analysis. *Crit Care Med* 2018;46:1411-20.  
[PUBMED](#) | [CROSSREF](#)

117. Lian XJ, Huang DZ, Cao YS, Wei YX, Lian ZZ, Qin TH, He PC, Liu YH, Wang SH. Reevaluating the role of corticosteroids in septic shock: an updated meta-analysis of randomized controlled trials. *BioMed Res Int* 2019;2019:3175047.  
[PUBMED](#) | [CROSSREF](#)
118. Villar J, Ferrando C, Martínez D, Ambrós A, Muñoz T, Soler JA, Aguilar G, Alba F, González-Higueras E, Conesa LA, Martín-Rodríguez C, Díaz-Domínguez FJ, Serna-Grande P, Rivas R, Ferreres J, Belda J, Capilla L, Tallet A, Añón JM, Fernández RL, González-Martín JM; dexamethasone in ARDS network. Dexamethasone treatment for the acute respiratory distress syndrome: a multicentre, randomised controlled trial. *Lancet Respir Med* 2020;8:267-76.  
[PUBMED](#) | [CROSSREF](#)
119. Lewis SR, Pritchard MW, Thomas CM, Smith AF. Pharmacological agents for adults with acute respiratory distress syndrome. *Cochrane Database Syst Rev* 2019;7:CD004477.  
[PUBMED](#) | [CROSSREF](#)
120. RECOVERY Collaborative Group, Horby P, Lim WS, Emberson JR, Mafham M, Bell JL, Linsell L, Staplin N, Brightling C, Ustianowski A, Elmahi E, Prudon B, Green C, Felton T, Chadwick D, Rege K, Fegan C, Chappell LC, Faust SN, Jaki T, Jeffery K, Montgomery A, Rowan K, Juszczak E, Baillie JK, Haynes R, Landray MJ. Dexamethasone in hospitalized patients with Covid-19. *N Engl J Med* 2021;384:693-704.
121. Tomazini BM, Maia IS, Cavalcanti AB, Berwanger O, Rosa RG, Veiga VC, Avezum A, Lopes RD, Bueno FR, Silva MVAO, Baldassare FP, Costa ELV, Moura RAB, Honorato MO, Costa AN, Damiani LP, Lisboa T, Kawano-Dourado L, Zampieri FG, Olivato GB, Righy C, Amendola CP, Roepke RML, Freitas DHM, Forte DN, Freitas FGR, Fernandes CCF, Melro LMG, Junior GFS, Morais DC, Zung S, Machado FR, Azevedo LCP; COALITION COVID-19 Brazil III investigators. Effect of dexamethasone on days alive and ventilator-free in patients with moderate or severe acute respiratory distress syndrome and COVID-19: The CoDEX randomized clinical trial. *JAMA* 2020;324:1307-16.  
[PUBMED](#) | [CROSSREF](#)
122. Dequin PF, Heming N, Meziani F, Plantefève G, Voiriot G, Badié J, François B, Aubron C, Ricard JD, Ehrmann S, Jouan Y, Guillon A, Leclerc M, Coffre C, Bourgoin H, Lengellé C, Caille-Fénérol C, Tavernier E, Zohar S, Giraudeau B, Annane D, Le Gouge A; CAPE COVID trial group and the CRICS-TriGGERSep network. Effect of hydrocortisone on 21-day mortality or respiratory support among critically ill patients With COVID-19: a randomized clinical trial. *JAMA* 2020;324:1298-306.  
[PUBMED](#) | [CROSSREF](#)
123. Angus DC, Derde L, Al-Beidh F, Annane D, Arabi Y, Beane A, van Bentum-Puijk W, Berry L, Bhimani Z, Bonten M, Bradbury C, Brunkhorst F, Buxton M, Buzgau A, Cheng AC, de Jong M, Detry M, Estcourt L, Fitzgerald M, Goossens H, Green C, Haniffa R, Higgins AM, Horvat C, Hulleger SJ, Kruger P, Lamontagne F, Lawler PR, Linstrum K, Litton E, Lorenzi E, Marshall J, McAuley D, McGlothlin A, McGuinness S, McVerry B, Montgomery S, Mouncey P, Murthy S, Nichol A, Parke R, Parker J, Rowan K, Sanil A, Santos M, Saunders C, Seymour C, Turner A, van de Veerdonk F, Venkatesh B, Zarychanski R, Berry S, Lewis RJ, McArthur C, Webb SA, Gordon AC, Al-Beidh F, Angus D, Annane D, Arabi Y, van Bentum-Puijk W, Berry S, Beane A, Bhimani Z, Bonten M, Bradbury C, Brunkhorst F, Buxton M, Cheng A, De Jong M, Derde L, Estcourt L, Goossens H, Gordon A, Green C, Haniffa R, Lamontagne F, Lawler P, Litton E, Marshall J, McArthur C, McAuley D, McGuinness S, McVerry B, Montgomery S, Mouncey P, Murthy S, Nichol A, Parke R, Rowan K, Seymour C, Turner A, van de Webb S, Zarychanski R, Campbell L, Forbes A, Gattas D, Heritier S, Higgins L, Kruger P, Peake S, Presneil J, Seppelt I, Trapani T, Young P, Bagshaw S, Daneman N, Fergusson N, Misak C, Santos M, Hulleger S, Pletz M, Rohde G, Rowan K, Alexander B, Basile K, Girard T, Horvat C, Huang D, Linstrum K, Vates J, Beasley R, Fowler R, McLaughlin S, Morpeth S, Paterson D, Venkatesh B, Uyeki T, Baillie K, Duffy E, Fowler R, Hills T, Orr K, Patanwala A, Tong S, Netea M, Bihari S, Carrier M, Fergusson D, Goligher E, Haidar G, Hunt B, Kumar A, Laffan M, Lawless P, Lothar S, McCallum P, Middeldop S, McQuilten Z, Neal M, Pasi J, Schutgens R, Stanworth S, Turgeon A, Weissman A, Adhikari N, Anstey M, Brant E, de Man A, Lamonagne F, Masse MH, Udy A, Arnold D, Begin P, Charlewood R, Chasse M, Coyne M, Cooper J, Daly J, Gosbell I, Harvala-Simmonds H, Hills T, MacLennan S, Menon D, McDyer J, Priede N, Roberts D, Shankar-Hari M, Thomas H, Tinmouth A, Triulzi D, Walsh T, Wood E, Calfee C, O'Kane C, Shyamsundar M, Sinha P, Thompson T, Young I, Bihari S, Hodgson C, Laffey J, McAuley D, Orford N, Neto A, Detry M, Fitzgerald M, Lewis R, McGlothlin A, Sanil A, Saunders C, Berry L, Lorenzi E, Miller E, Singh V, Zammit C, van Bentum Puijk W, Bouwman W, Mangindaan Y, Parker L, Peters S, Rietveld I, Raymakers K, Ganpat R, Brillinger N, Markgraf R, Ainscough K, Brickell K, Anjum A, Lane JB, Richards-Belle A, Saull M, Wiley D, Bion J, Connor J, Gates S, Manax V, van der, Reynolds J, van Beurden M, Effelaar E, Schotsman J, Boyd C, Harland C, Shearer A, Wren J, Clermont G, Garrard W, Kalchthaler K, King A, Ricketts D, Malakoutis S, Marroquin O, Music E, Quinn K, Cate H, Pearson K, Collins J, Hanson J, Williams P, Jackson S, Asghar A, Dyas S, Sutu M, Murphy S, Williamson D, Mguni N, Potter A, Porter D, Goodwin J, Rook C, Harrison S, Williams H, Campbell H, Lomme K, Williamson J, Sheffield J, van't Hoff W, McCracken P, Young M, Board J, Mart E, Knott C, Smith J, Boschert C, Affleck J, Ramanan M, D'Souza R, Pateman K, Shakih A, Cheung W, Kol M,

Wong H, Shah A, Wagh A, Simpson J, Duke G, Chan P, Cartner B, Hunter S, Laver R, Shrestha T, Regli A, Pellicano A, McCullough J, Tallott M, Kumar N, Panwar R, Brinkerhoff G, Koppen C, Cazzola F, Brain M, Mineall S, Fischer R, Biradar V, Soar N, White H, Estensen K, Morrison L, Smith J, Cooper M, Health M, Shehabi Y, Al-Bassam W, Hulley A, Whitehead C, Lowrey J, Gresha R, Walsham J, Meyer J, Harward M, Venz E, Williams P, Kurenda C, Smith K, Smith M, Garcia R, Barge D, Byrne D, Byrne K, Driscoll A, Fortune L, Janin P, Yarad E, Hammond N, Bass F, Ashelford A, Waterson S, Wedd S, McNamara R, Buhr H, Coles J, Schweikert S, Wibrow B, Rauniyar R, Myers E, Fysh E, Dawda A, Mevavala B, Litton E, Ferrier J, Nair P, Buscher H, Reynolds C, Santamaria J, Barbazza L, Homes J, Smith R, Murray L, Brailsford J, Forbes L, Maguire T, Mariappa V, Smith J, Simpson S, Maiden M, Bone A, Horton M, Salerno T, Sterba M, Geng W, Depuydt P, De Waele J, De Bus L, Fierens J, Bracke S, Reeve B, Dechert W, Chassé M, Carrier FM, Boumahni D, Benettaib F, Ghamraoui A, Bellemare D, Cloutier È, Francoeur C, Lamontagne F, D'Aragon F, Carbonneau E, Leblond J, Vazquez-Grande G, Marten N, Wilson M, Albert M, Serri K, Cavayas A, Duplax M, Williams V, Rochweg B, Karachi T, Oczkowski S, Centofanti J, Millen T, Duan E, Tsang J, Patterson L, English S, Watpool I, Porteous R, Mieziitis S, McIntyre L, Brochard L, Burns K, Sandhu G, Khalid I, Binnie A, Powell E, McMillan A, Luk T, Aref N, Andric Z, Cvijevic S, Dimoti R, Zapalac M, Mirković G, Baršić B, Kutleša M, Kotarski V, Vujaklija Brajković A, Babel J, Sever H, Dragija L, Kušan I, Vaara S, Pettilä L, Heinonen J, Kuitunen A, Karlsson S, Vahtera A, Kiiski H, Ristimäki S, Azaiz A, Charron C, Godement M, Geri G, Vieillard-Baron A, Pourcine F, Monchi M, Luis D, Mercier R, Sagnier A, Verrier N, Caplin C, Siami S, Aparicio C, Vautier S, Jebbaoui A, Fartoukh M, Courtin L, Labbe V, Leparco C, Muller G, Nay MA, Kamel T, Benzekri D, Jacquier S, Mercier E, Chartier D, Salmon C, Dequin P, Schneider F, Morel G, L'Hotellier S, Badie J, Berdaguer FD, Malfroy S, Mezher C, Bourgoin C, Megarbane B, Voicu S, Deye N, Malissin I, Sutterlin L, Guitton C, Darreau C, Landais M, Chudeau N, Robert A, Moine P, Heming N, Maxime V, Bossard I, Nicholier TB, Colin G, Zinzoni V, Maquigneau N, Finn A, Krefß G, Hoff U, Friedrich Hinrichs C, Nee J, Pletz M, Hagel S, Ankert J, Kolanos S, Bloos F, Petros S, Pasięka B, Kunz K, Appelt P, Schütze B, Kluge S, Nierhaus A, Jarczak D, Roedl K, Weissmann D, Frey A, Klinikum Neukölln V, Reill L, Distler M, Maselli A, Bělteczi J, Magyar I, Fazekas Á, Kovács S, Szőke V, Szigligeti G, Leszkoven J, Collins D, Breen P, Frohlich S, Whelan R, McNicholas B, Scully M, Casey S, Kernan M, Doran P, O'Dwyer M, Smyth M, Hayes L, Hoiting O, Peters M, Rengers E, Evers M, Prinssen A, Bosch Ziekenhuis J, Simons K, Rozendaal W, Polderman F, de Jager P, Moviat M, Paling A, Salet A, Rademaker E, Peters AL, de Jonge E, Wigbers J, Guilder E, Butler M, Cowdrey KA, Newby L, Chen Y, Simmonds C, McConnochie R, Ritzema Carter J, Henderson S, Van Der Heyden K, Mehrrens J, Williams T, Kazemi A, Song R, Lai V, Girijadevi D, Everitt R, Russell R, Hacking D, Buehner U, Williams E, Browne T, Grimwade K, Goodson J, Keet O, Callender O, Martynoga R, Trask K, Butler A, Schischka L, Young C, Lesona E, Olatunji S, Robertson Y, José N, Amaro dos Santos Catorze T, de Lima Pereira TNA, Neves Pessoa LM, Castro Ferreira RM, Pereira Sousa Bastos JM, Aysel Florescu S, Stanciu D, Zaharia MF, Kosa AG, Codreanu D, Marabi Y, Al Qasim E, Moneer Hagazy M, Al Swaidan L, Arishi H, Muñoz-Bermúdez R, Marin-Corral J, Salazar Degracia A, Parrilla Gómez F, Mateo López MI, Rodríguez Fernandez J, Cárcel Fernández S, Carmona Flores R, León López R, de la Fuente Martos C, Allan A, Polgarova P, Farahi N, McWilliam S, Hawcutt D, Rad L, O'Malley L, Whitbread J, Kelsall O, Wild L, Thrush J, Wood H, Austin K, Donnelly A, Kelly M, O'Kane S, McClintock D, Warnock M, Johnston P, Gallagher LJ, Mc Goldrick C, Mc Master M, Strzelecka A, Jha R, Kalogirou M, Ellis C, Krishnamurthy V, Deelchand V, Silversides J, McGuigan P, Ward K, O'Neill A, Finn S, Phillips B, Mullan D, Oritz-Ruiz de Gordo A, Thomas M, Sweet K, Grimmer L, Johnson R, Pinnell J, Robinson M, Gledhill L, Wood T, Morgan M, Cole J, Hill H, Davies M, Antcliffe D, Templeton M, Rojo R, Coghlan P, Smee J, Mackay E, Cort J, Whileman A, Spencer T, Spittle N, Kasipandian V, Patel A, Allibone S, Genetu RM, Ramali M, Ghosh A, Bamford P, London E, Cawley K, Faulkner M, Jeffrey H, Smith T, Brewer C, Gregory J, Limb J, Cowton A, O'Brien J, Nikitas N, Wells C, Lankester L, Pullett M, Williams P, Birch J, Wiseman S, Horton S, Alegria A, Turki S, Elsefi T, Crisp N, Allen L, McCullagh I, Robinson P, Hays C, Babio-Galan M, Stevenson H, Khare D, Pinder M, Selvamoni S, Gopinath A, Pugh R, Menzies D, Mackay C, Allan E, Davies G, Puxty K, McCue C, Cathcart S, Hickey N, Ireland J, Yusuf H, Isgro G, Brightling C, Bourne M, Craner M, Watters M, Prout R, Davies L, Pegler S, Kyeremeh L, Arbane G, Wilson K, Gomm L, Francia F, Brett S, Sousa Arias S, Elin Hall R, Budd J, Small C, Birch J, Collins E, Henning J, Bonner S, Hugill K, Cirstea E, Wilkinson D, Karlikowski M, Sutherland H, Wilhelmsen E, Woods J, North J, Sundaran D, Hollos L, Coburn S, Walsh J, Turns M, Hopkins P, Smith J, Noble H, Depante MT, Clarey E, Laha S, Verlander M, Williams A, Huckle A, Hall A, Cooke J, Gardiner-Hill C, Maloney C, Qureshi H, Flint N, Nicholson S, Southin S, Nicholson A, Borgatta B, Turner-Bone I, Reddy A, Wilding L, Chamara Warnapura L, Agno Sathianathan R, Golden D, Hart C, Jones J, Bannard-Smith J, Henry J, Birchall K, Pomeroy F, Quayle R, Makowski A, Misztal B, Ahmed I, KyereDiabour T, Naiker K, Stewart R, Mwaura E, Mew L, Wren L, Willams F, Innes R, Doble P, Hutter J, Shovelton C, Plumb B, Szakmany T, Hamlyn V, Hawkins N, Lewis S, Dell A, Gopal S, Ganguly S, Smallwood A, Harris N, Metherell S, Lazaro JM, Newman T, Fletcher S, Nortje J, Fottrell-Gould D, Randell G, Zaman M, Elmahi E, Jones A, Hall K, Mills G, Ryalls K, Bowler H, Sall J, Bourne R, Borrill Z, Duncan T, Lamb T, Shaw J, Fox C, Moreno Cuesta J, Xavier K, Purohit D, Elhassan M, Bakthavatsalam D, Rowland M, Hutton P, Bashyal A, Davidson N, Hird C, Chhablani M, Phalod G, Kirkby A, Archer S, Netherton K, Reschreiter H, Camsooksai J, Patch S,

- Jenkins S, Pogson D, Rose S, Daly Z, Brimfield L, Claridge H, Parekh D, Bergin C, Bates M, Dasgin J, McGhee C, Sim M, Hay SK, Henderson S, Phull MK, Zaidi A, Pogreban T, Rosaroso LP, Harvey D, Lowe B, Meredith M, Ryan L, Hormis A, Walker R, Collier D, Kimpton S, Oakley S, Rooney K, Rodden N, Hughes E, Thomson N, McGlynn D, Walden A, Jacques N, Coles H, Tilney E, Vowell E, Schuster-Bruce M, Pitts S, Miln R, Purandare L, Vamplew L, Spivey M, Bean S, Burt K, Moore L, Day C, Gibson C, Gordon E, Zitter L, Keenan S, Baker E, Cherian S, Cutler S, Roynon-Reed A, Harrington K, Raithatha A, Bauchmuller K, Ahmad N, Grecu I, Trodd D, Martin J, Wrey Brown C, Arias AM, Craven T, Hope D, Singleton J, Clark S, Rae N, Welters I, Hamilton DO, Williams K, Waugh V, Shaw D, Puthuchearu Z, Martin T, Santos F, Uddin R, Somerville A, Tatham KC, Jhanji S, Black E, Dela Rosa A, Howle R, Tully R, Drummond A, Dearden J, Philbin J, Munt S, Vuylsteke A, Chan C, Victor S, Matsa R, Gellamucho M, Creagh-Brown B, Tooley J, Montague L, De Beaux F, Bullman L, Kerslake I, Demetriou C, Mitchard S, Ramos L, White K, Donnison P, Johns M, Casey R, Mattocks L, Salisbury S, Dark P, Claxton A, McLachlan D, Slevin K, Lee S, Hulme J, Joseph S, Kinney F, Senya HJ, Oborska A, Kayani A, Hadebe B, Orath Prabakaran R, Nichols L, Thomas M, Worner R, Faulkner B, Gendall E, Hayes K, Hamilton-Davies C, Chan C, Mfuko C, Abbass H, Mandadapu V, Leaver S, Forton D, Patel K, Paramasivam E, Powell M, Gould R, Wilby E, Howcroft C, Banach D, Fernández de, Cabrerós L, White I, Croft M, Holland N, Pereira R, Zaki A, Johnson D, Jackson M, Garrard H, Juhaz V, Roy A, Rostron A, Woods L, Cornell S, Pillai S, Harford R, Rees T, Ivatt H, Sundara Raman A, Davey M, Lee K, Barber R, Chablani M, Brohi F, Jagannathan V, Clark M, Purvis S, Wetherill B, Dushianthan A, Cusack R, de Courcy-Golder K, Smith S, Jackson S, Attwood B, Parsons P, Page V, Zhao XB, Oza D, Rhodes J, Anderson T, Morris S, Xia Le, Thomas A, Keen A, Digby S, Cowley N, Wild L, Southern D, Reddy H, Campbell A, Watkins C, Smuts S, Touma O, Barnes N, Alexander P, Felton T, Ferguson S, Sellers K, Bradley-Potts J, Yates D, Birkinshaw I, Kell K, Marshall N, Carr-Knott L, Summers C. Effect of Hydrocortisone on Mortality and Organ Support in Patients With Severe COVID-19: The REMAP-CAP COVID-19 Corticosteroid Domain Randomized Clinical Trial. *JAMA* 2020;324:1317-29.  
[PUBMED](#) | [CROSSREF](#)
124. Jeronimo CMP, Farias MEL, Val FFA, Sampaio VS, Alexandre MAA, Melo GC, Safe IP, Borba MGS, Abreu-Netto RL, Maciel ABS, Neto JRS, Oliveira LB, Figueiredo EFG, Dinelly KMO, Rodrigues MGA, Brito M, Mourão MPG, Pivoto João GA, Hajjar LA, Bassat Q, Romero GAS, Naveca FG, Vasconcelos HL, Tavares MA, Brito-Sousa JD, Costa FTM, Nogueira ML, Baía-da-Silva D, Xavier MS, Monteiro WM, Lacerda MVG; for the Metcovid Team. Methylprednisolone as adjunctive therapy for patients hospitalized with COVID-19 (Metcovid): a randomised, double-blind, phase IIb, placebo-controlled trial. *Clin Infect Dis* 2020:ciaa1177.  
[PUBMED](#) | [CROSSREF](#)
  125. Ruiz-Irastorza G, Pijoan JI, Bereciartua E, Dunder S, Dominguez J, Garcia-Escudero P, Rodrigo A, Gomez-Carballo C, Varona J, Guio L, Ibarrola M, Ugarte A, Martinez-Berriotxo A; Cruces COVID Study Group. Second week methyl-prednisolone pulses improve prognosis in patients with severe coronavirus disease 2019 pneumonia: an observational comparative study using routine care data. *PLoS One* 2020;15:e0239401.  
[PUBMED](#) | [CROSSREF](#)
  126. Majmundar M, Kansara T, Lenik JM, Park H, Ghosh K, Doshi R, Shah P, Kumar A, Amin H, Chaudhari S, Habtes I, Pancaldi L, Tedeschi S, Giannella M, Rinaldi M, Bussini L, Valentini I, Ferravante AF, Potalivo A, Marchionni E, Fornaro G, Pascale R, Pasquini Z, Puoti M, Merli M, Barchiesi F, Volpato F, Rubin A, Saracino A, Tonetti T, Gaibani P, Ranieri VM, Viale P, Cristini F; PREDICO Study Group. Efficacy of corticosteroids in non-intensive care unit patients with COVID-19 pneumonia from the New York Metropolitan region. *PLoS One* 2020;15:e0238827.  
[PUBMED](#) | [CROSSREF](#)
  127. Bartoletti M, Marconi L, Scudeller L. Efficacy of corticosteroid treatment for hospitalized patients with severe COVID-19: a multicentre study. *Clin Microbiol Infect* 2021;27:105-11.  
[PUBMED](#) | [CROSSREF](#)
  128. Li Q, Li W, Jin Y, Xu W, Huang C, Li L, Huang Y, Fu Q, Chen L. Efficacy evaluation of early, low-dose, short-term corticosteroids in adults hospitalized with non-severe COVID-19 pneumonia: a retrospective cohort study. *Infect Dis Ther* 2020;9:823-36.  
[PUBMED](#) | [CROSSREF](#)
  129. WHO Rapid Evidence Appraisal for COVID-19 Therapies (REACT) Working Group, Sterne JAC, Murthy S, Diaz JV, Slutsky AS, Villar J, Angus DC, Annane D, Azevedo LCP, Berwanger O, Cavalcanti AB, Dequin PF, Du B, Emberson J, Fisher D, Giraudeau B, Gordon AC, Granholm A, Green C, Haynes R, Heming N, Higgins JPT, Horby P, Jüni P, Landray MJ, Le Gouge A, Leclerc M, Lim WS, Machado FR, McArthur C, Meziani F, Möller MH, Perner A, Petersen MW, Savovic J, Tomazini B, Veiga VC, Webb S, Marshall JC. Association between administration of systemic corticosteroids and mortality among critically ill patients with COVID-19: a meta-analysis. *JAMA* 2020;324:1330-41.
  130. World Health Organization (WHO). Clinical management of severe acute respiratory infection (SARI) when COVID-19 disease is suspected: interim guidance, 13 March 2020. WHO: 2020.

131. Lamontagne F, Rochwerg B, Lytvyn L, Guyatt GH, Møller MH, Annane D, Kho ME, Adhikari NKJ, Machado F, Vandvik PO, Dodek P, Leboeuf R, Briel M, Hashmi M, Camsooksai J, Shankar-Hari M, Baraki MK, Fugate K, Chua S, Marti C, Cohen D, Botton E, Agoritsas T, Siemieniuk RAC. Corticosteroid therapy for sepsis: a clinical practice guideline. *BMJ* 2018;362:k3284.  
[PUBMED](#) | [CROSSREF](#)
132. Akira S, Taga T, Kishimoto T. Interleukin-6 in biology and medicine. *Adv Immunol* 1993;54:178.  
[PUBMED](#) | [CROSSREF](#)
133. Choy EH, De Benedetti F, Takeuchi T, Hashizume M, John MR, Kishimoto T. Translating IL-6 biology into effective treatments. *Nat Rev Rheumatol* 2020;16:335-45.  
[PUBMED](#) | [CROSSREF](#)
134. Zhang C, Wu Z, Li JW, Zhao H, Wang GQ. Cytokine release syndrome in severe COVID-19: interleukin-6 receptor antagonist tocilizumab may be the key to reduce mortality. *Int J Antimicrob Agents* 2020;55:105954.  
[PUBMED](#) | [CROSSREF](#)
135. McGonagle D, Sharif K, O'Regan A, Bridgewood C. The role of cytokines including interleukin-6 in COVID-19 induced pneumonia and macrophage activation syndrome-like disease. *Autoimmun Rev* 2020;19:102537.  
[PUBMED](#) | [CROSSREF](#)
136. Coomes EA, Haghbayan H. Interleukin-6 in Covid-19: a systematic review and meta-analysis. *Rev Med Virol* 2020;30:1-9.  
[PUBMED](#) | [CROSSREF](#)
137. Ruan Q, Yang K, Wang W, Jiang L, Song J. Clinical predictors of mortality due to COVID-19 based on an analysis of data of 150 patients from Wuhan, China. *Intensive Care Med* 2020;46:846-8.  
[PUBMED](#) | [CROSSREF](#)
138. Qin C, Zhou L, Hu Z, Zhang S, Yang S, Tao Y, Xie C, Ma K, Shang K, Wang W, Tian DS. Dysregulation of immune response in patients with coronavirus 2019 (COVID-19) in Wuhan, China. *Clin Infect Dis* 2020;71:762-8.  
[PUBMED](#) | [CROSSREF](#)
139. Gupta S, Wang W, Hayek SS, Chan L, Mathews KS, Melamed ML, Brenner SK, Leonberg-Yoo A, Schenck EJ, Radbel J, Reiser J, Bansal A, Srivastava A, Zhou Y, Finkel D, Green A, Mallappallil M, Faugno AJ, Zhang J, Velez JCQ, Shaefi S, Parikh CR, Charytan DM, Athavale AM, Friedman AN, Redfern RE, Short SAP, Correa S, Pokharel KK, Admon AJ, Donnelly JP, Gershengorn HB, Douin DJ, Semler MW, Hernán MA, Leaf DE; STOP-COVID Investigators. Association between early treatment with tocilizumab and mortality among critically ill patients with COVID-19. *JAMA Intern Med* 2021;181:41-51.  
[PUBMED](#) | [CROSSREF](#)
140. Sciascia S, Aprà F, Baffa A, Baldovino S, Boaro D, Boero R, Bonora S, Calcagno A, Cecchi I, Cinnirella G, Converso M, Cozzi M, Crosasso P, De Iaco F, Di Perri G, Eandi M, Fenoglio R, Giusti M, Imperiale D, Imperiale G, Livigni S, Manno E, Massara C, Milone V, Natale G, Navarra M, Oddone V, Osella S, Piccioni P, Radin M, Roccatello D, Rossi D. Pilot prospective open, single-arm multicentre study on off-label use of tocilizumab in patients with severe COVID-19. *Clin Exp Rheumatol* 2020;38:529-32.  
[PUBMED](#)
141. De Rossi N, Scarpazza C, Filippini C, Cordioli C, Rasia S, Mancinelli CR, Rizzoni D, Romanelli G, Cossi S, Vettoretto N, Bove S, Manfredini S, Beindorf EA, Mosca C, Scipione V, Flamminio G, Albini EA, Giansiracusa P, Capra R; Montichiari COVID-19 Study Group. Early use of low dose tocilizumab in patients with COVID-19: a retrospective cohort study with a complete follow-up. *EclinicalMedicine* 2020;25:100459.  
[PUBMED](#) | [CROSSREF](#)
142. Campochiaro C, Della-Torre E, Cavalli G, De Luca G, Ripa M, Boffini N, Tomelleri A, Baldissera E, Rovere-Querini P, Ruggeri A, Monti G, De Cobelli F, Zangrillo A, Tresoldi M, Castagna A, Dagna L; TOCI-RAF Study Group. Efficacy and safety of tocilizumab in severe COVID-19 patients: a single-centre retrospective cohort study. *Eur J Intern Med* 2020;76:43-9.  
[PUBMED](#) | [CROSSREF](#)
143. Kewan T, Covut F, Al-Jaghbeer MJ, Rose L, Gopalakrishna KV, Akbik B. Tocilizumab for treatment of patients with severe COVID-19: A retrospective cohort study. *EclinicalMedicine* 2020;24:100418.  
[PUBMED](#) | [CROSSREF](#)
144. Guaraldi G, Meschiari M, Cozzi-Lepri A, Milic J, Tonelli R, Menozzi M, Franceschini E, Cuomo G, Orlando G, Borghi V, Santoro A, Di Gaetano M, Puzzolante C, Carli F, Bedini A, Corradi L, Fantini R, Castaniere I, Tabbi L, Girardis M, Tedeschi S, Giannella M, Bartoletti M, Pascale R, Dolci G, Brugioni L, Pietrangelo A, Cossarizza A, Pea F, Clini E, Salvarani C, Massari M, Viale PL, Mussini C. Tocilizumab in patients with severe COVID-19: a retrospective cohort study. *Lancet Rheumatol* 2020;2:e474-84.  
[PUBMED](#) | [CROSSREF](#)

145. Rodríguez-Baño J, Pachón J, Carratalà J, Ryan P, Jarrín I, Yllescas M, Arribas JR, Berenguer J; SAM-COVID Study Group. Treatment with tocilizumab or corticosteroids for COVID-19 patients with hyperinflammatory state: a multicentre cohort study (SAM-COVID-19). *Clin Microbiol Infect* 2021;27:244-52.  
[PUBMED](#) | [CROSSREF](#)
146. Biran N, Ip A, Ahn J, Go RC, Wang S, Mathura S, Sinclair BA, Bednarz U, Marafelias M, Hansen E, Siegel DS, Goy AH, Pecora AL, Sawczuk IS, Koniaris LS, Simwenyi M, Varga DW, Tank LK, Stein AA, Allusson V, Lin GS, Oser WF, Tuma RA, Reichman J, Brusco L Jr, Carpenter KL, Costanzo EJ, Vivona V, Goldberg SL. Tocilizumab among patients with COVID-19 in the intensive care unit: a multicentre observational study. *Lancet Rheumatol* 2020;2:e603-12.  
[PUBMED](#) | [CROSSREF](#)
147. Chilimuri S, Sun H, Alemam A, Kang KS, Lao P, Mantri N, Schiller L, Sharabun M, Shehi E, Tejada J, Yugay A, Nayudu SK. Tocilizumab use in patients with moderate to severe COVID-19: a retrospective cohort study. *J Clin Pharm Ther* 2021;46:440-6.  
[PUBMED](#) | [CROSSREF](#)
148. Stone JH, Frigault MJ, Serling-Boyd NJ, Fernandes AD, Harvey L, Foulkes AS, Horick NK, Healy BC, Shah R, Bensaci AM, Woolley AE, Nikiforow S, Lin N, Sagar M, Schrager H, Huckins DS, Axelrod M, Pincus MD, Fleisher J, Sacks CA, Dougan M, North CM, Halvorsen YD, Thurber TK, Dagher Z, Scherer A, Wallwork RS, Kim AY, Schoenfeld S, Sen P, Neilan TG, Perugino CA, Unizony SH, Collier DS, Matza MA, Vinh JM, Bowman KA, Meyerowitz E, Zafar A, Drobní ZD, Bolster MB, Kohler M, D'Silva KM, Dau J, Lockwood MM, Cubbison C, Weber BN, Mansour MK; BACC bay tocilizumab trial investigators. Efficacy of tocilizumab in patients hospitalized with Covid-19. *N Engl J Med* 2020;383:2333-44.  
[PUBMED](#) | [CROSSREF](#)
149. Rosas IO, Bräu N, Waters M, Go RC, Hunter BD, Bhagani S, Skiest D, Aziz MS, Cooper N, Douglas IS, Savic S, Youngstein T, Del Sorbo L, Cubillo Gracian A, De La Zerda DJ, Ustianowski A, Bao M, Dimonaco S, Graham E, Matharu B, Spotswood H, Tsai L, Malhotra A. Tocilizumab in hospitalized patients with severe Covid-19 pneumonia. *N Engl J Med* 2021;NEJMoa2028700.  
[PUBMED](#) | [CROSSREF](#)
150. Roche. Roche's phase III EMPACTA study showed Actemra/RoActemra reduced the likelihood of needing mechanical ventilation in hospitalised patients with COVID-19 associated pneumonia. Available at: <https://www.roche.com/media/releases/med-cor-2020-09-18.htm>. Accessed 8 December 2020.
151. Salvarani C, Dolci G, Massari M, Merlo DF, Cavuto S, Savoldi L, Bruzzi P, Boni F, Braglia L, Turrà C, Ballerini PF, Sciascia R, Zammarchi L, Para O, Scotton PG, Inojosa WO, Ravagnani V, Salerno ND, Sainaghi PP, Brignone A, Codeluppi M, Teopompi E, Milesi M, Bertomoro P, Claudio N, Salio M, Falcone M, Cenderello G, Donghi L, Del Bono V, Colombelli PL, Angheben A, Passaro A, Secondo G, Pascale R, Piazza I, Facciolongo N, Costantini M; RCT-TCZ-COVID-19 Study Group. Effect of tocilizumab vs standard care on clinical worsening in patients hospitalized with COVID-19 pneumonia: a randomized clinical trial. *JAMA Intern Med* 2021;181:24-31.  
[PUBMED](#) | [CROSSREF](#)
152. Hermine O, Mariette X, Tharaux PL, Resche-Rigon M, Porcher R, Ravaud P; CORIMUNO-19 collaborative group. Effect of tocilizumab vs usual care in adults hospitalized with COVID-19 and moderate or severe pneumonia: a randomized clinical trial. *JAMA Intern Med* 2021;181:32-40.  
[PUBMED](#) | [CROSSREF](#)
153. Wang D, Fu B, Peng Z, Yang D, Han M, Li M, Yang Y, Yang T, Sun L, Li W, Shi W, Yao X, Ma Y, Xu F, Wang X, Chen J, Xia D, Sun Y, Dong L, Wang J, Zhu X, Zhang M, Zhou Y, Pan A, Hu X, Mei X, Wei H, Xu X. Tocilizumab in patients with moderate or severe COVID-19: a randomized, controlled, open-label, multicenter trial. *Front Med* 2021. [Epub ahead of print].  
[PUBMED](#) | [CROSSREF](#)
154. Martínez-Sanz J, Muriel A, Ron R, Herrera S, Pérez-Molina JA, Moreno S, Serrano-Villar S. Effects of tocilizumab on mortality in hospitalized patients with COVID-19: a multicentre cohort study. *Clin Microbiol Infect* 2021;27:238-43.  
[PUBMED](#) | [CROSSREF](#)
155. Boregowda U, Perisetti A, Nanjappa A, Gajendran M, Kutti Sridharan G, Goyal H. Addition of tocilizumab to the standard of care reduces mortality in severe COVID-19: a systematic review and meta-analysis. *Front Med (Lausanne)* 2020;7:586221.  
[PUBMED](#) | [CROSSREF](#)
156. Aziz M, Haghbin H, Abu Sitta E, Nawras Y, Fatima R, Sharma S, Lee-Smith W, Duggan J, Kammeyer JA, Hanrahan J, Assaly R. Efficacy of tocilizumab in COVID-19: a systematic review and meta-analysis. *J Med Virol* 2021;93:1620-30.  
[PUBMED](#) | [CROSSREF](#)

157. Berardicurti O, Ruscitti P, Ursini F, D'Andrea S, Ciaffi J, Meliconi R, Iagnocco A, Cipriani P, Giacomelli R. Mortality in tocilizumab-treated patients with COVID-19: a systematic review and meta-analysis. *Clin Exp Rheumatol* 2020;38:1247-54.  
[PUBMED](#)
158. Kotak S, Khatri M, Malik M, Malik M, Hassan W, Amjad A, Malik F, Hassan H, Ahmed J, Zafar M. Use of tocilizumab in COVID-19: a systematic review and meta-analysis of current evidence. *Cureus* 2020;12:e10869.  
[PUBMED](#)
159. Lan SH, Lai CC, Huang HT, Chang SP, Lu LC, Hsueh PR. Tocilizumab for severe COVID-19: a systematic review and meta-analysis. *Int J Antimicrob Agents* 2020;56:106103.  
[PUBMED](#) | [CROSSREF](#)
160. Tleyjeh IM, Kashour Z, Damla M, Riaz M, Tlayjeh H, Altannir M, Altannir Y, Al-Tannir M, Tleyjeh R, Hassett L, Kashour T. Efficacy and safety of tocilizumab in COVID-19 patients: a living systematic review and meta-analysis. *Clin Microbiol Infect* 2021;27:215-27.  
[PUBMED](#) | [CROSSREF](#)
161. Montesarchio V, Parrela R, Iommelli C, Bianco A, Manzillo E, Fraganza F, Palumbo C, Rea G, Murino P, De Rosa R, Atripaldi L, D'Abbraccio M, Curvietto M, Mallardo D, Celentano E, Grimaldi AM, Palla M, Trojaniello C, Vitale MG, Million-Weaver SL, Ascierto PA. Outcomes and biomarker analyses among patients with COVID-19 treated with interleukin 6 (IL-6) receptor antagonist sarilumab at a single institution in Italy. *J Immunother Cancer* 2020;8:e001089.  
[PUBMED](#) | [CROSSREF](#)
162. Campbell L, Chen C, Bhagat SS, Parker RA, Östör AJ. Risk of adverse events including serious infections in rheumatoid arthritis patients treated with tocilizumab: a systematic literature review and meta-analysis of randomized controlled trials. *Rheumatology (Oxford)* 2011;50:552-62.  
[PUBMED](#) | [CROSSREF](#)
163. Ingraham NE, Lotfi-Emran S, Thielen BK, Techar K, Morris RS, Holtan SG, Dudley RA, Tignanelli CJ. Immunomodulation in COVID-19. *Lancet Respir Med* 2020;8:544-6.  
[PUBMED](#) | [CROSSREF](#)
164. Cavalli G, De Luca G, Campochiaro C, Della-Torre E, Ripa M, Canetti D, Oltolini C, Castiglioni B, Tassin Din C, Boffini N, Tomelleri A, Farina N, Ruggeri A, Rovere-Querini P, Di Lucca G, Martinenghi S, Scotti R, Tresoldi M, Ciceri F, Landoni G, Zangrillo A, Scarpellini P, Dagna L. Interleukin-1 blockade with high-dose anakinra in patients with COVID-19, acute respiratory distress syndrome, and hyperinflammation: a retrospective cohort study. *Lancet Rheumatol* 2020;2:e325-31.  
[PUBMED](#) | [CROSSREF](#)
165. Huet T, Beaussier H, Voisin O, Jouvessomme S, Dauriat G, Lazareth I, Sacco E, Naccache JM, Bézie Y, Laplanche S, Le Berre A, Le Pavec J, Salmeron S, Emmerich J, Mourad JJ, Chatellier G, Hayem G. Anakinra for severe forms of COVID-19: a cohort study. *Lancet Rheumatol* 2020;2:e393-400.  
[PUBMED](#) | [CROSSREF](#)
166. Langer-Gould A, Smith JB, Gonzales EG, Castillo RD, Figueroa JG, Ramanathan A, Li BH, Gould MK. Early identification of COVID-19 cytokine storm and treatment with anakinra or tocilizumab. *Int J Infect Dis* 2020;99:291-7.  
[PUBMED](#) | [CROSSREF](#)
167. Cauchois R, Koubi M, Delarbre D, Manet C, Carvelli J, Blasco VB, Jean R, Fouche L, Bornet C, Pauly V, Mazodier K, Pestre V, Jarrot PA, Dinarello CA, Kaplanski G. Early IL-1 receptor blockade in severe inflammatory respiratory failure complicating COVID-19. *Proc Natl Acad Sci U S A* 2020;117:18951-3.  
[PUBMED](#) | [CROSSREF](#)
168. Narain S, Stefanov DG, Chau AS, Weber AG, Marder G, Kaplan B, Malhotra P, Bloom O, Liu A, Lesser ML, Hajizadeh N; Northwell COVID-19 research consortium. Comparative survival analysis of immunomodulatory therapy for coronavirus disease 2019 cytokine storm. *Chest* 2021;159:933-48.  
[PUBMED](#) | [CROSSREF](#)
169. Clementi N, Ferrarese R, Criscuolo E, Diotti RA, Castelli M, Scagnolari C, Burioni R, Antonelli G, Clementi M, Mancini N. Interferon- $\beta$ -1a inhibition of severe acute respiratory syndrome-coronavirus 2 in vitro when administered after virus infection. *J Infect Dis* 2020;222:722-5.  
[PUBMED](#) | [CROSSREF](#)
170. Bastard P, Rosen LB, Zhang Q, Michailidis E, Hoffmann HH, Zhang Y, Dorgham K, Philippot Q, Rosain J, Béziat V, Manry J, Shaw E, Haljasmägi L, Peterson P, Lorenzo L, Bizien L, Trouillet-Assant S, Dobbs K, de Jesus AA, Belot A, Kallaste A, Catherinot E, Tandjaoui-Lambiotte Y, Le Pen J, Kerner G, Bigio B, Seeleuthner Y, Yang R, Bolze A, Spaan AN, Delmonte OM, Abers MS, Aiuti A, Casari G, Lampasona V, Piemonti L, Ciceri F, Bilguvar K, Lifton RP, Vasse M, Smadja DM, Migaud M, Hadjadj J, Terrier B, Duffy D, Quintana-Murci L, van de, Roussel L, Vinh DC, Tangye SG, Haerynck F, Dalmau D, Martinez-Picado J,



- Brodin P, Nussenzweig MC, Boisson-Dupuis S, Rodríguez-Gallego C, Vogt G, Mogensen TH, Oler AJ, Gu J, Burbelo PD, Cohen JI, Biondi A, Bettini LR, D'Angio M, Bonfanti P, Rossignol P, Mayaux J, Rieux-Laucat F, Husebye ES, Fusco F, Ursini MV, Imberti L, Sottini A, Paghera S, Quiros-Roldan E, Rossi C, Castagnoli R, Montagna D, Licari A, Marseglia GL, Duval X, Ghosn J; HGID Lab; NIAID-USUHS Immune Response to COVID Group; COVID Clinicians; COVID-STORM Clinicians; Imagine COVID Group; French COVID Cohort Study Group; Milieu Intérieur Consortium; CoV-Contact Cohort; Amsterdam UMC Covid-19 Biobank; COVID Human Genetic Effort, Tsang JS, Goldbach-Mansky R, Kisand K, Lionakis MS, Puel A, Zhang SY, Holland SM, Gorochov G, Jouanguy E, Rice CM, Cobat A, Notarangelo LD, Abel L, Su HC, Casanova JL. Autoantibodies against type I IFNs in patients with life-threatening COVID-19. *Science* 2020;370:eabd4585.  
[PUBMED](#) | [CROSSREF](#)
171. Zhang Q, Bastard P, Liu Z, Le Pen J, Moncada-Velez M, Chen J, Ogishi M, Sabli IKD, Hodeib S, Korol C, Rosain J, Bilguvar K, Ye J, Bolze A, Bigio B, Yang R, Arias AA, Zhou Q, Zhang Y, Onodi F, Korniotis S, Karpf L, Philippot Q, Chbihi M, Bonnet-Madin L, Dorgham K, Smith N, Schneider WM, Razooky BS, Hoffmann HH, Michailidis E, Moens L, Han JE, Lorenzo L, Bizien L, Meade P, Neehus AL, Ugurbil AC, Corneau A, Kerner G, Zhang P, Rapaport F, Seeleuthner Y, Manry J, Masson C, Schmitt Y, Schlüter A, Le Voyer T, Khan T, Li J, Fellay J, Roussel L, Shahrooei M, Alosaimi MF, Mansouri D, Al-Saud H, Al-Mulla F, Almourfi F, Al-Muhsen SZ, Alsohime F, Al Turki S, Hasanato R, van de Beek B, Biondi A, Bettini LR, D'Angio M, Bonfanti P, Imberti L, Sottini A, Paghera S, Quiros-Roldan E, Rossi C, Oler AJ, Tompkins MF, Alba C, Vandernoot I, Goffard JC, Smits G, Migeotte I, Haerynck F, Soler-Palacin P, Martin-Nalda A, Colobran R, Morange PE, Keles S, Çölkesen F, Özcelik T, Yasar KK, Senoglu S, Karabela ŞN, Rodríguez-Gallego C, Novelli G, Hraiech S, Tandjaoui-Lambiotte Y, Duval X, Laouénan C; COVID-STORM Clinicians; COVID Clinicians; Imagine COVID Group; French COVID Cohort Study Group; CoV-Contact Cohort; Amsterdam UMC Covid-19 Biobank; COVID Human Genetic Effort; NIAID-USUHS/TAGC COVID Immunity Group, Snow AL, Dalgard CL, Milner JD, Vinh DC, Mogensen TH, Marr N, Spaan AN, Boisson B, Boisson-Dupuis S, Bustamante J, Puel A, Ciancanelli MJ, Meyts I, Maniatis T, Soumelis V, Amara A, Nussenzweig M, García-Sastre A, Krammer F, Pujol A, Duffy D, Lifton RP, Zhang SY, Gorochov G, Béziat V, Jouanguy E, Sancho-Shimizu V, Rice CM, Abel L, Notarangelo LD, Cobat A, Su HC, Casanova JL. Inborn errors of type I IFN immunity in patients with life-threatening COVID-19. *Science* 2020;370:eabd4570.  
[PUBMED](#) | [CROSSREF](#)
172. Food and Drug Administration (FDA). Interferon alpha-2b (Intron® A). Available at: [https://www.accessdata.fda.gov/drugsatfda\\_docs/label/2018/103132Orig1s51991bl.pdf](https://www.accessdata.fda.gov/drugsatfda_docs/label/2018/103132Orig1s51991bl.pdf). Accessed 8 December 2020.
173. Davoudi-Monfared E, Rahmani H, Khalili H, Hajiabdolbaghi M, Salehi M, Abbasian L, Kazemzadeh H, Yekaninejad MS. A randomized clinical trial of the efficacy and safety of interferon  $\beta$ -1a in treatment of severe COVID-19. *Antimicrob Agents Chemother* 2020;64:e01061-20.  
[PUBMED](#) | [CROSSREF](#)
174. National Institutes of Health (NIH). Ongoing clinical trials for interferon and COVI-19. Available at: <https://www.covid19treatmentguidelines.nih.gov/immune-based-therapy/immunomodulators/interferons/>. Accessed 8 December 2020.
175. Food and Drug Administration (FDA). Interferon alpha-2b (Intron® A). Available at: [https://www.accessdata.fda.gov/drugsatfda\\_docs/label/2018/103132Orig1s51991bl.pdf](https://www.accessdata.fda.gov/drugsatfda_docs/label/2018/103132Orig1s51991bl.pdf). Accessed 8 December 2020.
176. Monk PD, Marsden RJ, Tear VJ, Brookes J, Batten TN, Mankowski M, Gabbay FJ, Davies DE, Holgate ST, Ho LP, Clark T, Djukanovic R, Wilkinson TMA; Inhaled Interferon Beta COVID-19 Study Group. Safety and efficacy of inhaled nebulised interferon beta-1a (SNG001) for treatment of SARS-CoV-2 infection: a randomised, double-blind, placebo-controlled, phase 2 trial. *Lancet Respir Med* 2021;9:196-206.  
[PUBMED](#) | [CROSSREF](#)
177. Cheng Y, Wong R, Soo YO, Wong WS, Lee CK, Ng MH, Chan P, Wong KC, Leung CB, Cheng G. Use of convalescent plasma therapy in SARS patients in Hong Kong. *Eur J Clin Microbiol Infect Dis* 2005;24:44-6.  
[PUBMED](#) | [CROSSREF](#)
178. Mo Y, Fisher D. A review of treatment modalities for Middle East respiratory syndrome. *J Antimicrob Chemother* 2016;71:3340-50.  
[PUBMED](#) | [CROSSREF](#)
179. Sahr F, Ansumana R, Massaquoi TA, Idriss BR, Sesay FR, Lamin JM, Baker S, Nicol S, Conton B, Johnson W, Abiri OT, Kargbo O, Kamara P, Goba A, Russell JB, Gevaio SM. Evaluation of convalescent whole blood for treating ebola virus disease in freetown, Sierra Leone. *J Infect* 2017;74:302-9.  
[PUBMED](#) | [CROSSREF](#)
180. Li L, Zhang W, Hu Y, Tong X, Zheng S, Yang J, Kong Y, Ren L, Wei Q, Mei H, Hu C, Tao C, Yang R, Wang J, Yu Y, Guo Y, Wu X, Xu Z, Zeng L, Xiong N, Chen L, Wang J, Man N, Liu Y, Xu H, Deng E, Zhang X, Li C, Wang C, Su S, Zhang L, Wang J, Wu Y, Liu Z. Effect of convalescent plasma therapy on time to clinical improvement in patients with severe and life-threatening COVID-19: a randomized clinical trial. *JAMA* 2020;324:460-70.  
[PUBMED](#) | [CROSSREF](#)

181. Agarwal A, Mukherjee A, Kumar G, Chatterjee P, Bhatnagar T, Malhotra P; PLACID Trial Collaborators. Convalescent plasma in the management of moderate covid-19 in adults in India: open label phase II multicentre randomised controlled trial (PLACID Trial). *BMJ* 2020;371:m3939.  
[PUBMED](#) | [CROSSREF](#)
182. Avendaño-Solà C, Ramos-Martínez A, Muñoz-Rubio E, Ruiz-Antorán B, Malo de, Torres F, Fernández-Cruz A, Callejas-Díaz A, Calderón J, Payares-Herrera C, Salcedo I, Romera I, Lora-Tamayo J, Mancheño-Losa M, Paciello ML, Villegas C, Estrada V, Saez-Serrano I, Porras-Leal ML, Jarilla-Fernández MC, Paño-Pardo JR, Moreno-Chulilla JA, Arrieta-Aldea I, Bosch A, Belhassen-García M, López-Villar O, Ramos-Garrido A, Blanco L, Madrigal-Sánchez ME, Contreras E, Muñiz-Díaz E, Domingo-Morera JM, Casas-Flecha I, Pérez-Olmeda M, García-Pérez J, Alcamí J, Bueno JL, Duarte RF; for the ConPlas-19 Study Group. Convalescent plasma for COVID-19: a multicenter, randomized clinical trial. *MedRxiv* 2020 [Epub ahead of print].
183. Gharbharan A, Jordans CC, GeurtsvanKessel C, den Hollander JG, Karim F, Mollema FP, Stalenhoef JE, Dofferhoff A, Ludwig I, Koster A, Hassing RJ, Bos JC, van Pottelberge GR, Vlasveld IN, Ammerlaan HSM, van Leeuwen-Segarseanu EM, Miedema J, van der Eerden M, Papageorgiou G, te Boekhorst P, Swaneveld FH, Katsikis PD, Mueller Y, Okba NMA, Koopmans MPG, Haagmans BHG, Rokx C, Rijnders BJA. Convalescent plasma for COVID-19. A randomized clinical trial. *MEDRxiv* 2020 [Epub ahead of print].
184. Simonovich VA, Burgos Pratx LD, Scibona P, Beruto MV, Vallone MG, Vázquez C, Savoy N, Giunta DH, Pérez LG, Sánchez MDL, Gamarnik AV, Ojeda DS, Santoro DM, Camino PJ, Antelo S, Rainero K, Vidiella GP, Miyazaki EA, Cornistein W, Trabadelo OA, Ross FM, Spotti M, Funtowicz G, Scordo WE, Losso MH, Ferniot I, Pardo PE, Rodríguez E, Rucci P, Pasquali J, Fuentes NA, Esperatti M, Speroni GA, Nannini EC, Matteaccio A, Michelangelo HG, Follmann D, Lane HC, Belloso WH; PlasmAr Study Group. A randomized trial of convalescent plasma in Covid-19 severe pneumonia. *N Engl J Med* 2021;384:619-29.  
[PUBMED](#) | [CROSSREF](#)
185. Joyner MJ, Bruno KA, Klassen SA, Kunze KL, Johnson PW, Lesser ER, Wiggins CC, Senefeld JW, Klompas AM, Hodge DO, Shepherd JRA, Rea RF, Whelan ER, Clayburn AJ, Spiegel MR, Baker SE, Larson KF, Ripoll JG, Andersen KJ, Buras MR, Vogt MNP, Herasevich V, Dennis JJ, Regimbal RJ, Bauer PR, Blair JE, van Buskirk CM, Winters JL, Stubbs JR, van Helmond N, Butterfield BP, Sexton MA, Diaz Soto JC, Paneth NS, Verdun NC, Marks P, Casadevall A, Fairweather D, Carter RE, Wright RS. Safety update: COVID-19 convalescent plasma in 20,000 hospitalized patients. *Mayo Clin Proc* 2020;95:1888-97.  
[PUBMED](#) | [CROSSREF](#)
186. Ahn JY, Sohn Y, Lee SH, Cho Y, Hyun JH, Baek YJ, Jeong SJ, Kim JH, Ku NS, Yeom JS, Roh J, Ahn MY, Chin BS, Kim YS, Lee H, Yong D, Kim HO, Kim S, Choi JY. Use of Convalescent Plasma Therapy in Two COVID-19 Patients with Acute Respiratory Distress Syndrome in Korea. *J Korean Med Sci* 2020;35:e149.  
[PUBMED](#) | [CROSSREF](#)
187. Gharebaghi N, Nejadrahim R, Mousavi SJ, Sadat-Ebrahimi SR, Hajizadeh R. Correction to: The use of intravenous immunoglobulin gamma for the treatment of severe coronavirus disease 2019: a randomized placebo-controlled double-blind clinical trial. *BMC Infect Dis* 2020;20:895.  
[PUBMED](#) | [CROSSREF](#)
188. Sakoulas G, Geriak M, Kullar R, Greenwood KL, Habib M, Vyas A, Ghafourian M, Dintyala VNK, Haddad F. Intravenous immunoglobulin (IVIG) significantly reduces respiratory morbidity in COVID-19 pneumonia: a prospective randomized trial. *medRxiv* 2020 [Epub ahead of print].
189. Shao Z, Feng Y, Zhong L, Xie Q, Lei M, Liu Z, Wang C, Ji J, Liu H, Gu Z, Hu Z, Su L, Wu M, Liu Z. Clinical efficacy of intravenous immunoglobulin therapy in critical ill patients with COVID-19: a multicenter retrospective cohort study. *Clin Transl Immunology* 2020;9:e1192.  
[PUBMED](#) | [CROSSREF](#)
190. Guo Y, Tian X, Wang X, Xiao Z. Adverse effects of immunoglobulin therapy. *Front Immunol* 2018;9:1299.  
[PUBMED](#) | [CROSSREF](#)
